# Supplementary material for: Туристские стандарты российской Федерации (1990-2011 гг. )
Source: Royal Society of Chemistry journal article supplement (doi:10.1039/c5cc09329e), 2012-01-01
Supplement: c5cc09329e1.pdf [file c5cc09329e1.pdf]

## Organocatalytic Enantio- and Diastereoselective Synthesis of 3,5-Disubstituted Prolines

Iker Riaño, Estibaliz Díaz, Uxue Uria, Efraím Reyes, Luisa Carrillo\* and Jose L. Vicario\*

Department of Organic Chemistry II

University of the Basque Country (UPV/EHU)

P.O. Box 644, 48080 Bilbao (Spain)

Phone: (+) 34 601 5454

Fax: (+) 34 601 2748

E-mail: [joseluis.vicario@ehu.es](mailto:joseluis.vicario@ehu.es)

### Contents

|                                       |            |
|---------------------------------------|------------|
| General Methods                       | page SI-2  |
| Materials                             | page SI-2  |
| Synthesis of Pyrrolidines <b>4a-q</b> | page SI-3  |
| Synthesis of Prolines <b>5a-q</b>     | page SI-14 |
| Synthesis of Prolines <b>6a-b</b>     | page SI-23 |
| NMR Spectra                           | page SI-24 |
| HPLC Chromatograms                    | page SI-61 |

**General Methods.**<sup>1</sup> NMR spectra were acquired on a 300 spectrometer, running at 300 or 500 MHz and 75.4 MHz for <sup>1</sup>H and <sup>13</sup>C, respectively. Chemical shifts ( $\delta$ ) are reported in ppm relative to residual solvent signals (CHCl<sub>3</sub>, 7.26 ppm for <sup>1</sup>H NMR; CDCl<sub>3</sub>, 77.0 ppm for <sup>13</sup>C NMR). The following abbreviations are used to indicate the multiplicity in <sup>1</sup>H NMR spectra: s, singlet; d, doublet; t, triplet; m, multiplet; bs, broad signal. <sup>13</sup>C NMR spectra were acquired on a broad band decoupled mode. For infrared (IR) spectra only characteristic bands are given in cm<sup>-1</sup>. Mass spectra (MS) were recorded on a GC-MS spectrometer using electronic impact (EI) techniques (70 eV). High resolution mass spectrometry (HRMS) were recorded under chemical ionization (CI) TOF conditions using GC when necessary. Analytical thin layer chromatography (TLC) was performed using pre-coated aluminum-backed plates and visualized by ultraviolet irradiation, phosphomolybdic acid or potassium permanganate reagent. Melting points (M.p.) are given in °C. Optical rotations ( $\alpha$  value) were measured in the specified solvent at given concentration in g/100 mL. The enantiomeric excess (e.e.) of the products were determined by chiral stationary phase HPLC using photodiode array detector and using the indicated chiral column in each case. Standards for the optimization of the HPLC conditions for the separation of the two enantiomers were synthesized using either a equimolar mixture of **3a** with the corresponding quinidine-based primary amine as catalyst or, alternatively, using benzydrylamine as catalyst.

**Materials.** Analytical grade solvents and commercially available reagents were used without further purification. For flash chromatography (FC) silica gel was used.

---

<sup>1</sup> SGIker technical support (MEC, GV/EJ and European Social Fund) is gratefully acknowledged (NMR, Elementary analysis, HRMS analysis and allocation of computational resources).

## Synthesis of pyrrolidines (4a-q)

### General procedure for the Michael addition/imine formation step.

The aminomalonate **1** (0.56 mmol) was added to a solution of 9-*epi*-9-amino-9-deoxycinchonidine **3a** (0.08 mmol), methanesulfonic acid (0.16 mmol), and the corresponding  $\alpha,\beta$ -unsaturated ketone **2** (0.40 mmol) in THF (2 mL). The reaction was stirred at room temperature, following its evolution by  $^1\text{H-NMR}$ . After consumption of the starting material, the solvent was removed obtaining the corresponding cyclic imine, which was reduced without further purification as follows.

### General procedure for the reduction step.

$\text{NaBH}_3\text{CN}$  (0.8 mmol) was added to a solution of the crude cyclic imine in dried EtOH (15 mL) under inert atmosphere. The mixture was stirred at room temperature for 2 hours, HCl (1 M) was added till reaching an acidic pH and it was stirred for another 10 minutes. The solvent was removed under reduced pressure and a saturated solution of NaCl (10 mL) was added, followed by the addition of NaOH (4 M), till a basic pH was observed, and the mixture was extracted with  $\text{CH}_2\text{Cl}_2$  (3 x 10 mL). The combined organic layers were dried with anhydrous  $\text{Na}_2\text{SO}_4$ , filtered and the solvent was removed under reduced pressure. The pyrrolidines **1a-q** were obtained following this procedure, and purified by flash column chromatography with the indicated eluent.

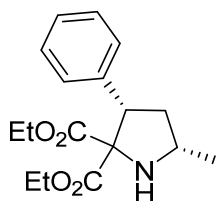

### (3*S*,5*S*)-Diethyl 5-methyl-3-phenylpyrrolidine-2,2-dicarboxylate, (**4a**).

The pyrrolidine **4a** (110 mg, 0.36 mmol, 89%) was obtained after 42 hours as a colourless oil, after isolation by flash column chromatography (hexanes/EtOAc gradient from 8:2 to 7:3) according to the general procedure using diethyl 2-aminomalonate **1a** (98 mg, 0.56 mmol) and (*E*)-4-phenylbut-3-en-2-one **2a** (59 mg, 0.40 mmol) in the presence of methanesulfonic acid (15 mg, 0.16 mmol), 9-*epi*-9-amino-9-deoxycinchonidine **3a** (23 mg, 0.08 mmol) and using THF (2 mL) as solvent, followed by the reduction using sodium cyanoborohydride (50 mg, 0.80 mmol) and EtOH as solvent (15 mL).  $^1\text{H-NMR}$  ( $\text{CDCl}_3$ , 300 MHz)  $\delta$  7.46-7.03 (m, 5H), 4.41-4.25 (m, 2H), 4.14 (dq,  $J = 10.7, 7.1$  Hz, 1H), 3.78 (dq,  $J = 10.6, 7.1$  Hz, 1H), 3.42 (dq,  $J = 10.6, 7.1$  Hz, 1H), 3.32-3.17 (m, 1H), 2.79 (bs, 1H), 2.29 (ddd,  $J = 12.3, 7.0, 5.4$  Hz, 1H), 1.82-1.67 (m, 1H), 1.35 (d,  $J = 6.1$  Hz, 3H), 1.24 (t,  $J = 7.1$  Hz, 3H), 0.72 (t,  $J = 7.1$  Hz, 3H).  $^{13}\text{C-NMR}$  ( $\text{CDCl}_3$ , 75 MHz)  $\delta$  171.3, 170.3, 140.1, 128.6, 128.0, 126.9, 77.9, 61.8, 61.5, 53.6, 50.9, 41.6, 19.9, 14.0, 13.3. FTIR (ATR,  $\text{cm}^{-1}$ ): 1723 (C=O st). MS (70 eV)  $m/z$  (%): 232 ( $\text{M}^+ - \text{CO}_2\text{Et}$ , 100), 204 (8), 186 (2), 170 (1), 159 (11), 144 (9), 127 (11), 116 (43), 103 (3), 91 (8), 77 (3), 65 (1), 55 (4), 44 (1), 29 (6). HRMS: calculated for  $[\text{C}_{17}\text{H}_{24}\text{NO}_4]^+$ : 306.1705 [(M + H) $^+$ ]; found: 306.1706. The ee was determined by HPLC using a Chiralpak IA column [*n*-hexane/*i*-PrOH (98:2)]; flow rate 1.0 mL/min;  $T_{\text{major}} = 10.28$  min,  $T_{\text{minor}} = 9.42$  min (89% ee).  $[\alpha]_{\text{D}}^{20}$ : -20.8 ( $c = 1.00$ ,  $\text{CH}_2\text{Cl}_2$ ).

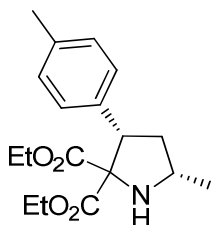

**(3S,5S)-Diethyl 5-methyl-3-(*p*-tolyl)pyrrolidine-2,2-dicarboxylate, (4b).**

The pyrrolidine **4b** (89 mg, 0.28 mmol, 70%) was obtained after 41 hours as a colourless oil, after isolation by flash column chromatography (hexanes/EtOAc gradient from 8:2 to 7:3) according to the general procedure using diethyl 2-aminomalonate **1a** (98 mg, 0.56 mmol) and (*E*)-4-(*p*-tolyl)but-3-en-2-one **2b** (64 mg, 0.40 mmol) in the presence of methanesulfonic acid (15 mg, 0.16 mmol), 9-epi-9-amino-9-deoxycinchonidine **3a** (23 mg, 0.08 mmol) and using THF (2 mL) as solvent, followed by the reduction using sodium cyanoborohydride (50 mg, 0.80 mmol) and EtOH as solvent (15 mL). <sup>1</sup>H-NMR (CDCl<sub>3</sub>, 300 MHz) δ 7.15 (d, *J* = 8.1 Hz, 2H), 7.00 (d, *J* = 8.1 Hz, 2H), 4.35-4.17 (m, 2H), 4.09 (dq, *J* = 10.8, 7.1 Hz, 1H), 3.74 (dq, *J* = 10.6, 7.1 Hz, 1H), 3.41 (dq, *J* = 10.6, 7.1 Hz, 1H), 3.27-3.11 (m, 1H), 2.74 (bs, 1H), 2.29-2.14 (m, 4H), 1.75-1.60 (m, 1H), 1.29 (d, *J* = 6.1 Hz, 3H), 1.19 (t, *J* = 7.1 Hz, 3H), 0.70 (t, *J* = 7.1 Hz, 3H). <sup>13</sup>C-NMR (CDCl<sub>3</sub>, 75 MHz) δ 171.2, 170.4, 136.8, 136.3, 128.6, 128.4, 77.8, 61.6, 61.3, 53.5, 50.5, 41.6, 20.9, 19.9, 13.9, 13.2. FTIR (ATR, cm<sup>-1</sup>): 1724 (C=O st). MS (70 eV) *m/z* (%): 246 (M<sup>+</sup> - CO<sub>2</sub>Et, 100), 218 (4), 201 (6), 184 (1), 173 (13), 155 (13), 145 (5), 130 (38), 115 (55), 103 (4), 91 (5), 77 (3), 65 (1), 55 (4), 45 (1), 29 (5). HRMS: calculated for [C<sub>18</sub>H<sub>26</sub>NO<sub>4</sub>]<sup>+</sup>: 320.1862 [(M + H)<sup>+</sup>]; found: 320.1862. The ee was determined by HPLC using a Chiralpak IA column [*n*-hexane/*i*-PrOH (98:2)]; flow rate 1.0 mL/min; T<sub>major</sub> = 14.02 min, T<sub>minor</sub> = 12.50 min (90% ee). [α]<sub>D</sub><sup>20</sup>: -26.8 (c = 1.03, CH<sub>2</sub>Cl<sub>2</sub>).

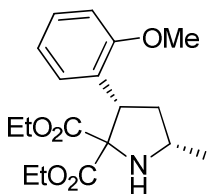

**(3S,5S)-Diethyl 3-(2-methoxyphenyl)-5-methylpyrrolidine-2,2-dicarboxylate, (4c).**

The pyrrolidine **4c** (90 mg, 0.27 mmol, 67%) was obtained after 119 hours as a colourless oil, after isolation by flash column chromatography (hexanes/EtOAc 8:2) according to the general procedure using diethyl 2-aminomalonate **1a** (98 mg, 0.56 mmol) and (*E*)-4-(2-methoxyphenyl)but-3-en-2-one **2c** (71 mg, 0.40 mmol) in the presence of methanesulfonic acid (15 mg, 0.16 mmol), 9-epi-9-amino-9-deoxycinchonidine **3a** (23 mg, 0.08 mmol) and using THF (2 mL) as solvent, followed by the reduction using sodium cyanoborohydride (50 mg, 0.80 mmol) and EtOH as solvent (15 mL). <sup>1</sup>H-NMR (CDCl<sub>3</sub>, 300 MHz) δ 7.24 (dd, *J* = 7.6, 1.7 Hz, 1H), 7.14 (ddd, *J* = 8.2, 7.6, 1.7 Hz, 1H), 6.87-6.81 (m, 1H), 6.78 (dd, *J* = 8.2, 1.1 Hz, 1H), 4.72 (dd, *J* = 9.8, 8.0 Hz, 1H), 4.30 (dq, *J* = 10.7, 7.1 Hz, 1H), 4.14 (dq, *J* = 10.7, 7.1 Hz, 1H), 3.86-3.71 (m, 4H), 3.48 (dq, *J* = 10.7, 7.1 Hz, 1H), 3.30-3.13 (m, 1H), 2.86 (bs, 1H), 2.29 (ddd, *J* = 12.3, 8.0, 5.9 Hz, 1H), 1.76-1.62 (m, 1H), 1.31 (d, *J* = 6.2 Hz, 3H), 1.23 (t, *J* = 7.1 Hz, 3H), 0.75 (t, *J* = 7.1 Hz, 3H). <sup>13</sup>C-NMR (CDCl<sub>3</sub>, 75 MHz) δ 171.1, 169.8, 157.7, 129.8, 129.1, 127.8, 120.4, 110.3, 77.6, 61.7, 61.1, 55.3, 53.5, 44.4, 41.3,

19.9, 14.0, 13.4. FTIR (ATR,  $\text{cm}^{-1}$ ): 1731 (C=O st). MS (70 eV)  $m/z$  (%): 262 ( $M^+ - \text{CO}_2\text{Et}$ , 100), 234 (1), 216 (32), 201 (30), 186 (5), 174 (5), 155 (11), 146 (13), 127 (14), 117 (5), 107 (3), 91 (9), 77 (4), 65 (1), 55 (4), 44 (1), 29 (4). HRMS: calculated for  $[\text{C}_{18}\text{H}_{26}\text{NO}_5]^+$ : 336.1811  $[(M + H)^+]$ ; found: 336.1800. The ee was determined by HPLC using a Chiralpak ASH column [*n*-hexane/*i*-PrOH (95:5)]; flow rate 1.0 mL/min;  $T_{\text{major}} = 4.90$  min,  $T_{\text{minor}} = 7.39$  min (89% ee).  $[\alpha]_{\text{D}}^{20}$ : +1.0 ( $c = 1.03$ ,  $\text{CH}_2\text{Cl}_2$ ).

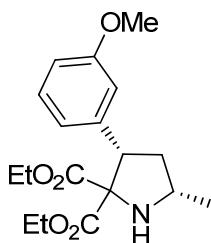

**(3S,5S)-Diethyl 3-(3-methoxyphenyl)-5-methylpyrrolidine-2,2-dicarboxylate, (4d).**

The pyrrolidine **4d** (104 mg, 0.31 mmol, 77%) was obtained after 68 hours as a colourless oil, after isolation by flash column chromatography (hexanes/EtOAc gradient from 8:2 to 7:3) according to the general procedure using diethyl 2-aminomalonate **1a** (98 mg, 0.56 mmol) and (*E*)-4-(3-methoxyphenyl)but-3-en-2-one **2d** (71 mg, 0.40 mmol) in the presence of methanesulfonic acid (15 mg, 0.16 mmol), 9-epi-9-amino-9-deoxycinchonidine **3a** (23 mg, 0.08 mmol) and using THF (2 mL) as solvent, followed by the reduction using sodium cyanoborohydride (50 mg, 0.80 mmol) and EtOH as solvent (15 mL).  $^1\text{H-NMR}$  ( $\text{CDCl}_3$ , 300 MHz)  $\delta$  7.30-7.21 (m, 1H), 7.15 (ddd,  $J = 8.1, 7.5, 1.7$  Hz, 1H), 6.90-6.75 (m, 2H), 4.73 (dd,  $J = 9.8, 8.0$  Hz, 1H), 4.31 (dq,  $J = 10.8, 7.1$  Hz, 1H), 4.15 (dq,  $J = 10.8, 7.1$  Hz, 1H), 3.86-3.72 (m, 4H), 3.49 (dq,  $J = 10.7, 7.1$  Hz, 1H), 3.31-3.14 (m, 1H), 2.87 (bs, 1H), 2.30 (ddd,  $J = 12.3, 8.0, 5.9$  Hz, 1H), 1.78-1.62 (m, 1H), 1.32 (d,  $J = 6.2$  Hz, 3H), 1.24 (t,  $J = 7.1$  Hz, 3H), 0.76 (t,  $J = 7.1$  Hz, 3H).  $^{13}\text{C-NMR}$  ( $\text{CDCl}_3$ , 75 MHz)  $\delta$  169.6, 168.7, 157.7, 140.1, 127.3, 119.2, 112.6, 111.0, 76.2, 60.2, 59.9, 53.5, 51.9, 49.3, 40.1, 18.3, 12.4, 11.7. FTIR (ATR,  $\text{cm}^{-1}$ ): 1724 (C=O st). MS (70 eV)  $m/z$  (%): 262 ( $M^+ - \text{CO}_2\text{Et}$ , 100), 234 (4), 216 (2), 201 (3), 188 (8), 174 (6), 161 (5), 146 (30), 127 (9), 117 (6), 103 (2), 91 (5), 77 (3), 65 (1), 55 (3), 41 (1), 29 (4). HRMS: calculated for  $[\text{C}_{18}\text{H}_{26}\text{NO}_5]^+$ : 336.1811  $[(M + H)^+]$ ; found: 336.1794. The ee was determined by HPLC using a Chiralpak ASH column [*n*-hexane/*i*-PrOH (95:5)]; flow rate 1.0 mL/min;  $T_{\text{major}} = 4.96$  min,  $T_{\text{minor}} = 6.91$  min (89% ee).  $[\alpha]_{\text{D}}^{20}$ : -26.8 ( $c = 0.98$ ,  $\text{CH}_2\text{Cl}_2$ ).

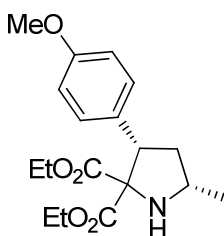

**(3S,5S)-Diethyl 3-(4-methoxyphenyl)-5-methylpyrrolidine-2,2-dicarboxylate, (4e).**

The pyrrolidine **4e** (106 mg, 0.32 mmol, 79%) was obtained after 41 hours as a colourless oil, after isolation by flash column chromatography (hexanes/EtOAc gradient from 8:2 to 7:3) according to the general procedure using diethyl 2-aminomalonate **1a** (98 mg, 0.56 mmol) and (*E*)-4-(4-methoxyphenyl)but-3-en-2-one **2e** (71 mg, 0.40 mmol) in the presence of methanesulfonic acid (15 mg, 0.16 mmol), 9-epi-9-amino-9-deoxycinchonidine **3a** (23

mg, 0.08 mmol) and using THF (2 mL) as solvent, followed by the reduction using sodium cyanoborohydride (50 mg, 0.80 mmol) and EtOH as solvent (15 mL).  $^1\text{H-NMR}$  ( $\text{CDCl}_3$ , 300 MHz)  $\delta$  7.19 (d,  $J = 8.7$  Hz, 2H), 6.74 (d,  $J = 8.7$  Hz, 2H), 4.36-4.16 (m, 2H), 4.09 (dq,  $J = 10.8, 7.1$  Hz, 1H), 3.83-3.68 (m, 4H), 3.43 (dq,  $J = 10.7, 7.1$  Hz, 1H), 3.25-3.11 (m, 1H), 2.67 (bs, 1H), 2.21 (ddd,  $J = 12.3, 7.0, 5.4$  Hz, 1H), 1.74-1.59 (m, 1H), 1.29 (d,  $J = 6.1$  Hz, 3H), 1.19 (t,  $J = 7.1$  Hz, 3H), 0.74 (t,  $J = 7.1$  Hz, 3H).  $^{13}\text{C-NMR}$  ( $\text{CDCl}_3$ , 75 MHz)  $\delta$  171.3, 170.4, 158.6, 131.9, 129.5, 113.3, 77.7, 61.7, 61.4, 55.2, 53.4, 50.1, 41.6, 19.9, 13.9, 13.4. FTIR (ATR,  $\text{cm}^{-1}$ ): 1722 (C=O st). MS (70 eV)  $m/z$  (%): 262 ( $\text{M}^+ - \text{CO}_2\text{Et}$ , 100), 234 (1), 216 (1), 201 (10), 189 (15), 174 (9), 155 (17), 146 (23), 127 (19), 115 (3), 103 (2), 91 (5), 77 (3), 65 (1), 55 (5), 42 (1), 19 (4). HRMS: calculated for  $[\text{C}_{18}\text{H}_{26}\text{NO}_5]^+$ : 336.1811 [(M + H) $^+$ ]; found: 336.1797. The ee was determined by HPLC using a Chiralpak ASH column [*n*-hexane/*i*-PrOH (95:5)]; flow rate 1.0 mL/min;  $T_{\text{major}} = 5.14$  min,  $T_{\text{minor}} = 7.47$  min (89% ee).  $[\alpha]_{\text{D}}^{20}$ : -28.6 ( $c = 0.99$ ,  $\text{CH}_2\text{Cl}_2$ ).

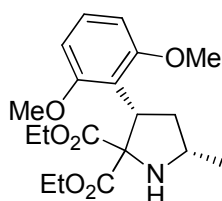

**(3S,5S)-Diethyl 3-(2,6-dimethoxyphenyl)-5-methylpyrrolidine-2,2-dicarboxylate, (4f).**

The pyrrolidine **4f** (92 mg, 0.25 mmol, 63%) was obtained after 97 hours as a colourless oil, after isolation by flash column chromatography (hexanes/EtOAc 1:1) according to the general procedure using diethyl 2-aminomalonate **1a** (98 mg, 0.56 mmol) and (*E*)-4-(2,6-dimethoxyphenyl)but-3-en-2-one **2f** (82 mg, 0.40 mmol) in the presence of methanesulfonic acid (15 mg, 0.16 mmol), 9-epi-9-amino-9-deoxycinchonidine **3a** (23 mg, 0.08 mmol) and using THF (2 mL) as solvent, followed by the reduction using sodium cyanoborohydride (50 mg, 0.80 mmol) and EtOH as solvent (15 mL).  $^1\text{H-NMR}$  ( $\text{CDCl}_3$ , 300 MHz)  $\delta$  7.07 (t,  $J = 8.3$  Hz, 1H), 6.46 (d,  $J = 8.3$  Hz, 2H), 5.12 (t,  $J = 9.0$  Hz, 1H), 4.29 (dq,  $J = 10.7, 7.1$  Hz, 1H), 4.11 (dq,  $J = 10.7, 7.1$  Hz, 1H), 3.83-3.70 (m, 7H), 3.59 (dq,  $J = 10.7, 7.1$  Hz, 1H), 3.24-3.07 (m, 1H), 2.93 (bs, 1H), 2.17 (ddd,  $J = 12.0, 9.2, 6.7$  Hz, 1H), 1.87 (ddd,  $J = 12.0, 10.3, 8.7$  Hz, 1H), 1.30 (d,  $J = 6.2$  Hz, 3H), 1.21 (t,  $J = 7.1$  Hz, 3H), 0.74 (t,  $J = 7.1$  Hz, 3H).  $^{13}\text{C-NMR}$  ( $\text{CDCl}_3$ , 75 MHz)  $\delta$  171.1, 169.1, 158.6, 127.6, 118.7, 104.1, 78.7, 61.8, 60.8, 56.0, 54.7, 40.5, 40.3, 19.5, 14.0, 13.4. FTIR (ATR,  $\text{cm}^{-1}$ ): 1731 (C=O st). MS (70 eV)  $m/z$  (%): 292 ( $\text{M}^+ - \text{CO}_2\text{Et}$ , 100), 264 (11), 246 (13), 231 (23), 215 (7), 201 (5), 191 (3), 176 (10), 155 (10), 146 (4), 127 (11), 102 (2), 91 (4), 77 (2), 55 (3), 41 (1), 29 (3). HRMS: calculated for  $[\text{C}_{19}\text{H}_{28}\text{NO}_6]^+$ : 366.1917 [(M + H) $^+$ ]; found: 366.1901. The ee was determined by HPLC using a Chiralpak ASH column [*n*-hexane/*i*-PrOH (95:5)]; flow rate 1.0 mL/min;  $T_{\text{major}} = 6.36$  min,  $T_{\text{minor}} = 5.27$  min (77% ee).  $[\alpha]_{\text{D}}^{20}$ : -20.8 ( $c = 0.99$ ,  $\text{CH}_2\text{Cl}_2$ ).

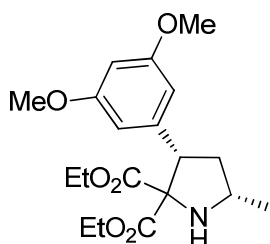

**(3S,5S)-Diethyl 3-(3,5-dimethoxyphenyl)-5-methylpyrrolidine-2,2-dicarboxylate, (4g).**

The pyrrolidine **4g** (98 mg, 0.27 mmol, 67%) was obtained after 29 hours as a colourless oil, after isolation by flash column chromatography (hexanes/EtOAc gradient from 8:2 to 7:3) according to the general procedure using diethyl 2-aminomalonate **1a** (98 mg, 0.56 mmol) and (*E*)-4-(3,5-dimethoxyphenyl)but-3-en-2-one **2g** (82 mg, 0.40 mmol) in the presence of methanesulfonic acid (15 mg, 0.16 mmol), 9-*epi*-9-amino-9-deoxycinchonidine **3a** (23 mg, 0.08 mmol) and using THF (2 mL) as solvent, followed by the reduction using sodium cyanoborohydride (50 mg, 0.80 mmol) and EtOH as solvent (15 mL). <sup>1</sup>H-NMR (CDCl<sub>3</sub>, 300 MHz) δ 6.47 (d, *J* = 2.3 Hz, 2H), 6.29 (t, *J* = 2.3 Hz, 1H), 4.32 (dq, *J* = 10.8, 7.1 Hz, 1H), 4.22 (dd, *J* = 11.2, 7.0 Hz, 1H), 4.12 (dq, *J* = 10.8, 7.1 Hz, 1H), 3.88-3.72 (m, 7H), 3.54 (dq, *J* = 10.6, 7.1 Hz, 1H), 3.29-3.13 (m, 1H), 2.68 (bs, 1H), 2.25 (ddd, *J* = 12.3, 7.0, 5.3 Hz, 1H), 1.76-1.59 (m, 1H), 1.32 (d, *J* = 6.1 Hz, 3H), 1.23 (t, *J* = 7.1 Hz, 3H), 0.79 (t, *J* = 7.1 Hz, 3H). <sup>13</sup>C-NMR (CDCl<sub>3</sub>, 75 MHz) δ 171.2, 170.4, 160.4, 142.5, 106.6, 99.2, 77.7, 61.8, 61.5, 55.3, 53.6, 51.1, 41.7, 19.9, 14.0, 13.4. FTIR (ATR, cm<sup>-1</sup>): 1724 (C=O st). MS (70 eV) *m/z* (%): 292 (M<sup>+</sup> - CO<sub>2</sub>Et, 100), 246 (2), 218 (6), 204 (3), 191 (4), 176 (17), 155 (5), 127 (5), 109 (2), 91 (2), 77 (1), 55 (2), 41 (1), 29 (3). HRMS: calculated for [C<sub>19</sub>H<sub>28</sub>NO<sub>6</sub>]<sup>+</sup>: 366.1917 [(M + H)<sup>+</sup>]; found: 366.1903. The ee was determined by HPLC using a Chiralpak ASH column [*n*-hexane/*i*-PrOH (95:5)]; flow rate 1.0 mL/min; *T*<sub>major</sub> = 5.91 min, *T*<sub>minor</sub> = 8.39 min (87% ee). [ $\alpha$ ]<sub>D</sub><sup>20</sup>: -27.4 (*c* = 1.01, CH<sub>2</sub>Cl<sub>2</sub>).

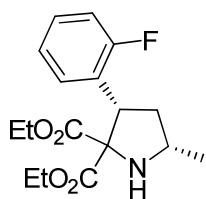

### (3*S*,5*S*)-Diethyl 3-(2-fluorophenyl)-5-methylpyrrolidine-2,2-dicarboxylate, (**4h**).

The pyrrolidine **4h** (100 mg, 0.31 mmol, 78%) was obtained after 42 hours as a colourless oil, after isolation by flash column chromatography (hexanes/EtOAc gradient from 8:2 to 7:3) according to the general procedure using diethyl 2-aminomalonate **1a** (98 mg, 0.56 mmol) and (*E*)-4-(2-fluorophenyl)but-3-en-2-one **2h** (66 mg, 0.40 mmol) in the presence of methanesulfonic acid (15 mg, 0.16 mmol), 9-*epi*-9-amino-9-deoxycinchonidine **3a** (23 mg, 0.08 mmol) and using THF (2 mL) as solvent, followed by the reduction using sodium cyanoborohydride (50 mg, 0.80 mmol) and EtOH as solvent (15 mL). <sup>1</sup>H-NMR (CDCl<sub>3</sub>, 300 MHz) δ 7.32 (dt, *J* = 7.6, 1.6 Hz, 1H), 7.22-7.09 (m, 1H), 7.09-6.89 (m, 2H), 4.62 (dd, *J* = 9.6, 7.9 Hz, 1H), 4.30 (dq, *J* = 10.7, 7.1 Hz, 1H), 4.14 (dq, *J* = 10.7, 7.1 Hz, 1H), 3.82 (dq, *J* = 10.7, 7.1 Hz, 1H), 3.54 (dq, *J* = 10.7, 7.2 Hz, 1H), 3.32-3.15 (m, 1H), 2.84 (bs, 1H), 2.35 (ddd, *J* = 12.8, 7.9, 6.0 Hz, 1H), 1.76-1.54 (m, 1H), 1.33 (d, *J* = 6.1 Hz, 3H), 1.23 (t, *J* = 7.1 Hz, 3H), 0.80 (t, *J* = 7.1 Hz, 3H). <sup>13</sup>C-NMR (CDCl<sub>3</sub>, 75 MHz) δ 170.7, 169.6, 161.1 (d, <sup>1</sup>*J*<sub>CF</sub> = 247.1 Hz), 129.8 (d, <sup>3</sup>*J*<sub>CF</sub> = 4.1 Hz), 128.3 (d, <sup>3</sup>*J*<sub>CF</sub> = 8.4 Hz), 128.1 (d, <sup>2</sup>*J*<sub>CF</sub> = 13.9 Hz), 123.8 (d, <sup>4</sup>*J*<sub>CF</sub> = 3.5 Hz), 115.0 (d, <sup>2</sup>*J*<sub>CF</sub> = 23.1 Hz), 77.6, 61.9, 61.4, 53.3, 43.0, 41.7, 19.9, 14.0, 13.3. FTIR (ATR, cm<sup>-1</sup>): 1724 (C=O st). MS (70 eV) *m/z* (%): 250 (M<sup>+</sup> - CO<sub>2</sub>Et, 100), 222 (11), 201 (2), 190 (1), 176 (15), 162 (6), 149 (11), 134 (43), 109 (8), 96 (1), 81 (1), 68 (1), 55 (3), 29 (5). HRMS: calculated for [C<sub>17</sub>H<sub>23</sub>FNO<sub>4</sub>]<sup>+</sup>: 324.1611 [(M + H)<sup>+</sup>]; found: 324.1601. The ee was determined by HPLC using a Chiralpak IA column [*n*-hexane/*i*-PrOH (98:2)]; flow rate 1.0 mL/min; *T*<sub>major</sub> = 15.79 min, *T*<sub>minor</sub> = 13.19 min (89% ee). [ $\alpha$ ]<sub>D</sub><sup>20</sup>: -31.6 (*c* = 1.03, CH<sub>2</sub>Cl<sub>2</sub>).

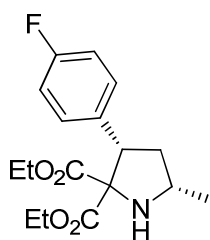

**(3S,5S)-Diethyl 3-(4-fluorophenyl)-5-methylpyrrolidine-2,2-dicarboxylate, (4i).**

The pyrrolidine **4i** (95 mg, 0.29 mmol, 74%) was obtained after 26 hours as a colourless oil, after isolation by flash column chromatography (hexanes/EtOAc gradient from 8:2 to 7:3) according to the general procedure using diethyl 2-aminomalonate **1a** (98 mg, 0.56 mmol) and (*E*)-4-(4-fluorophenyl)but-3-en-2-one **2i** (66 mg, 0.40 mmol) in the presence of methanesulfonic acid (15 mg, 0.16 mmol), 9-*epi*-9-amino-9-deoxycinchonidine **3a** (23 mg, 0.08 mmol) and using THF (2 mL) as solvent, followed by the reduction using sodium cyanoborohydride (50 mg, 0.80 mmol) and EtOH as solvent (15 mL). <sup>1</sup>H-NMR (CDCl<sub>3</sub>, 300 MHz) δ 7.35-7.23 (m, 2H), 7.00-6.86 (m, 2H), 4.41-4.21 (m, 2H), 4.14 (dq, *J* = 10.7, 7.1 Hz, 1H), 3.81 (dq, *J* = 10.7, 7.1 Hz, 1H), 3.48 (dq, *J* = 10.7, 7.1 Hz, 1H), 3.31-3.15 (m, 1H), 2.76 (bs, 1H), 2.27 (ddd, *J* = 12.3, 7.0, 5.4 Hz, 1H), 1.77-1.54 (m, 1H), 1.33 (d, *J* = 6.1 Hz, 3H), 1.23 (t, *J* = 7.1 Hz, 3H), 0.78 (t, *J* = 7.1 Hz, 3H). <sup>13</sup>C-NMR (CDCl<sub>3</sub>, 75 MHz) δ 171.1, 170.2, 161.9 (d, <sup>1</sup>*J*<sub>CF</sub> = 245.4 Hz), 135.8 (d, <sup>4</sup>*J*<sub>CF</sub> = 3.2 Hz), 130.1 (d, <sup>3</sup>*J*<sub>CF</sub> = 7.9 Hz), 114.7 (d, <sup>2</sup>*J*<sub>CF</sub> = 21.1 Hz), 77.7, 61.8, 61.5, 53.4, 50.0, 41.7, 19.9, 13.9, 13.4. FTIR (ATR, cm<sup>-1</sup>): 1724 (C=O st). MS (70 eV) *m/z* (%): 250 (M<sup>+</sup> - CO<sub>2</sub>Et, 100), 222 (7), 201 (3), 188 (1), 177 (12), 155 (8), 134 (21), 127 (11), 109 (9), 88 (1), 55 (5), 44 (1), 29 (5). HRMS: calculated for [C<sub>17</sub>H<sub>23</sub>FNO<sub>4</sub>]<sup>+</sup>: 324.1611 [(M + H)<sup>+</sup>]; found: 324.1599. The ee was determined by HPLC using a Chiralpak IA column [*n*-hexane/*i*-PrOH (99:1)]; flow rate 1.0 mL/min; T<sub>major</sub> = 14.52 min, T<sub>minor</sub> = 13.65 min (89% ee). [α]<sub>D</sub><sup>20</sup>: -26.7 (*c* = 0.99, CH<sub>2</sub>Cl<sub>2</sub>).

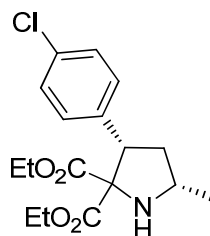

**(3S,5S)-Diethyl 3-(4-chlorophenyl)-5-methylpyrrolidine-2,2-dicarboxylate, (4j).**

The pyrrolidine **4j** (104 mg, 0.31 mmol, 78%) was obtained after 27 hours as a colourless oil, after isolation by flash column chromatography (hexanes/EtOAc gradient from 8:2 to 7:3) according to the general procedure using diethyl 2-aminomalonate **1a** (98 mg, 0.56 mmol) and (*E*)-4-(4-chlorophenyl)but-3-en-2-one **2j** (72 mg, 0.40 mmol) in the presence of methanesulfonic acid (15 mg, 0.16 mmol), 9-*epi*-9-amino-9-deoxycinchonidine **3a** (23 mg, 0.08 mmol) and using THF (2 mL) as solvent, followed by the reduction using sodium cyanoborohydride (50 mg, 0.80 mmol) and EtOH as solvent (15 mL). <sup>1</sup>H-NMR (CDCl<sub>3</sub>, 300 MHz) δ 7.27-7.10 (m, 4H), 4.35-4.16 (m, 2H), 4.09 (dq, *J* = 10.7, 7.1 Hz, 1H), 3.77 (dq, *J* = 10.7, 7.1 Hz, 1H), 3.46 (dq, *J* = 10.7, 7.1 Hz, 1H), 3.27-3.12 (m, 1H), 2.73 (bs, 1H), 2.23 (ddd, *J* = 12.3, 7.0, 5.4 Hz, 1H), 1.72-1.55 (m, 1H), 1.29 (d, *J* = 6.1 Hz, 3H), 1.19 (t, *J* = 7.1 Hz, 3H), 0.74 (t, *J* = 7.1 Hz, 3H). <sup>13</sup>C-NMR (CDCl<sub>3</sub>, 75 MHz) δ 171.0, 170.1, 138.6, 132.6, 129.9, 128.0, 77.6, 61.8, 61.5, 53.4, 50.1, 41.4, 19.9, 14.0, 13.3. FTIR (ATR, cm<sup>-1</sup>): 1724



(C=O st). MS (70 eV)  $m/z$  (%): 266 ( $M^+ - \text{CO}_2\text{Et}$ , 100), 238 (5), 220 (1), 193 (8), 178 (5), 165 (3), 150 (27), 138 (1), 127 (11), 115 (6), 103 (2), 89 (4), 78 (1), 55 (4), 29 (5). HRMS: calculated for  $[\text{C}_{17}\text{H}_{23}\text{ClNO}_4]^+$ : 340.1316  $[(M + H)^+]$ ; found: 340.1313. The ee was determined by HPLC using a Chiralpak IA column [*n*-hexane/*i*-PrOH (98:2)]; flow rate 1.0 mL/min;  $T_{\text{major}} = 13.42$  min,  $T_{\text{minor}} = 12.14$  min (89% ee).  $[\alpha]_{\text{D}}^{20}$ : -34.0 ( $c = 0.99$ ,  $\text{CH}_2\text{Cl}_2$ ).

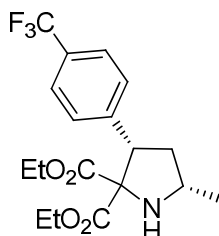

**(3S,5S)-Diethyl 5-methyl-3-(4-(trifluoromethyl)phenyl)pyrrolidine-2,2-dicarboxylate, (4k).**

The pyrrolidine **4k** (79 mg, 0.21 mmol, 53%) was obtained after 23 hours as a colourless oil, after isolation by flash column chromatography (hexanes/EtOAc gradient from 8:2 to 7:3) according to the general procedure using diethyl 2-aminomalonate **1a** (98 mg, 0.56 mmol) and (*E*)-4-(4-(trifluoromethyl)phenyl)but-3-en-2-one **2k** (86 mg, 0.40 mmol) in the presence of methanesulfonic acid (15 mg, 0.16 mmol), 9-epi-9-amino-9-deoxycinchonidine **3a** (23 mg, 0.08 mmol) and using THF (2 mL) as solvent, followed by the reduction using sodium cyanoborohydride (50 mg, 0.80 mmol) and EtOH as solvent (15 mL).  $^1\text{H-NMR}$  ( $\text{CDCl}_3$ , 300 MHz)  $\delta$  7.64-7.36 (m, 4H), 4.40-4.26 (m, 2H), 4.14 (dq,  $J = 10.7, 7.1$  Hz, 1H), 3.77 (dq,  $J = 10.7, 7.1$  Hz, 1H), 3.45 (dq,  $J = 10.7, 7.1$  Hz, 1H), 3.34-3.19 (m, 1H), 2.82 (bs, 1H), 2.30 (ddd,  $J = 12.4, 7.1, 5.4$  Hz, 1H), 1.79-1.65 (m, 1H), 1.34 (d,  $J = 6.1$  Hz, 3H), 1.23 (t,  $J = 7.1$  Hz, 3H), 0.70 (t,  $J = 7.1$  Hz, 3H).  $^{13}\text{C-NMR}$  ( $\text{CDCl}_3$ , 75 MHz)  $\delta$  171.0, 170.0, 144.4, 129.3 (q,  $^2J_{\text{CF}} = 32.5$  Hz), 129.0, 124.8 (q,  $^3J_{\text{CF}} = 3.7$  Hz), 124.2 (q,  $^1J_{\text{CF}} = 271.8$  Hz), 77.7, 62.0, 61.6, 53.5, 50.4, 41.3, 19.9, 13.9, 13.2. FTIR (ATR,  $\text{cm}^{-1}$ ): 1727 (C=O st). MS (70 eV)  $m/z$  (%): 300 ( $M^+ - \text{CO}_2\text{Et}$ , 100), 272 (13), 254 (1), 240 (1), 226 (14), 199 (15), 184 (35), 159 (5), 127 (6), 103 (1), 89 (1), 55 (4), 29 (5). HRMS: calculated for  $[\text{C}_{18}\text{H}_{23}\text{F}_3\text{NO}_4]^+$ : 374.1579  $[(M + H)^+]$ ; found: 374.1569. The ee was determined by HPLC using a Chiralpak ASH column [*n*-hexane/*i*-PrOH (98:2)]; flow rate 1.0 mL/min;  $T_{\text{major}} = 5.58$  min,  $T_{\text{minor}} = 6.97$  min (87% ee).  $[\alpha]_{\text{D}}^{20}$ : -23.4 ( $c = 1.03$ ,  $\text{CH}_2\text{Cl}_2$ ).

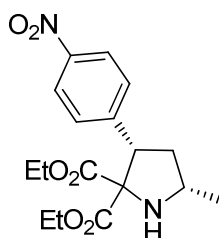

**(3S,5S)-Diethyl 5-methyl-3-(4-nitrophenyl)pyrrolidine-2,2-dicarboxylate, (4l).**

The pyrrolidine **4l** (98 mg, 0.28 mmol, 70%) was obtained after 20 hours as a colourless oil, after isolation by flash column chromatography (hexanes/EtOAc gradient from 8:2 to 7:3) according to the general procedure using diethyl 2-aminomalonate **1a** (98 mg, 0.56 mmol) and (*E*)-4-(4-nitrophenyl)but-3-en-2-one **2l** (77 mg, 0.40 mmol) in the presence of methanesulfonic acid (15 mg, 0.16 mmol), 9-epi-9-amino-9-deoxycinchonidine **3a** (23 mg, 0.08 mmol) and using THF (2 mL) as solvent, followed by the reduction using sodium

cyanoborohydride (50 mg, 0.80 mmol) and EtOH as solvent (15 mL).  $^1\text{H-NMR}$  ( $\text{CDCl}_3$ , 300 MHz)  $\delta$  8.14-8.07 (m, 2H), 7.54-7.48 (m, 2H), 4.39-4.26 (m, 2H), 4.16 (dq,  $J = 10.7, 7.1$  Hz, 1H), 3.82 (dq,  $J = 10.7, 7.1$  Hz, 1H), 3.49 (dq,  $J = 10.7, 7.2$  Hz, 1H), 3.35-3.21 (m, 1H), 2.81 (bs, 1H), 2.35 (ddd,  $J = 12.6, 7.2, 5.5$  Hz, 1H), 1.77-1.63 (m, 1H), 1.34 (d,  $J = 6.1$  Hz, 3H), 1.24 (t,  $J = 7.1$  Hz, 3H), 0.76 (t,  $J = 7.1$  Hz, 3H).  $^{13}\text{C-NMR}$  ( $\text{CDCl}_3$ , 75 MHz)  $\delta$  170.8, 169.6, 148.3, 146.9, 129.5, 128.1, 77.7, 62.1, 61.7, 53.4, 50.2, 41.4, 20.0, 14.0, 13.5. FTIR (ATR,  $\text{cm}^{-1}$ ): 1724 (C=O st), 1522 ( $\text{NO}_2$  st as), 1343 ( $\text{NO}_2$  st sym). MS (70 eV)  $m/z$  (%): 277 ( $\text{M}^+ - \text{CO}_2\text{Et}$ , 100), 261 (1), 249 (8), 231 (3), 203 (6), 189 (2), 172 (1), 157 (11), 142 (5), 130 (5), 115 (8), 103 (2), 89 (3), 77 (2), 55 (2), 41 (1), 29 (4). HRMS: calculated for  $[\text{C}_{17}\text{H}_{23}\text{N}_2\text{O}_6]^+$ : 351.1556 [(M + H) $^+$ ]; found: 351.1542. The ee was determined by HPLC using a Chiralpak ASH column [*n*-hexane/*i*-PrOH (98:2)]; flow rate 1.0 mL/min;  $T_{\text{major}} = 15.16$  min,  $T_{\text{minor}} = 19.05$  min (86% ee).  $[\alpha]_{\text{D}}^{20}$ : -29.5 ( $c = 0.98$ ,  $\text{CH}_2\text{Cl}_2$ ).

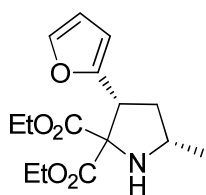

#### (3S,5S)-Diethyl 3-(furan-2-yl)-5-methylpyrrolidine-2,2-dicarboxylate, (4m).

The pyrrolidine **4m** (94 mg, 0.32 mmol, 80%) was obtained after 120 hours as a colourless oil, after isolation by flash column chromatography (hexanes/EtOAc gradient from 8:2 to 7:3) according to the general procedure using diethyl 2-aminomalonate **1a** (98 mg, 0.56 mmol) and (*E*)-4-(furan-2-yl)but-3-en-2-one **2m** (54 mg, 0.40 mmol) in the presence of trifluoroacetic acid (18 mg, 0.16 mmol), 9-*epi*-9-amino-9-deoxycinchonidine **3a** (23 mg, 0.08 mmol) and using  $\text{CHCl}_3$  (2 mL) as solvent, followed by the reduction using sodium cyanoborohydride (50 mg, 0.80 mmol) and EtOH as solvent (15 mL).  $^1\text{H-NMR}$  ( $\text{CDCl}_3$ , 300 MHz)  $\delta$  7.29 (dd,  $J = 1.8, 0.7$  Hz, 1H), 6.25 (dd,  $J = 3.1, 1.9$  Hz, 1H), 6.14 (d,  $J = 3.2$  Hz, 1H), 4.41-4.28 (m, 2H), 4.13 (dq,  $J = 10.7, 7.1$  Hz, 1H), 3.99 (dq,  $J = 10.7, 7.1$  Hz, 1H), 3.71 (dq,  $J = 10.7, 7.1$  Hz, 1H), 3.29-3.16 (m, 1H), 2.80 (bs, 1H), 2.24 (ddd,  $J = 12.3, 7.0, 5.4$  Hz, 1H), 1.78-1.69 (m, 1H), 1.32 (d,  $J = 6.2$  Hz, 3H), 1.24 (t,  $J = 7.1$  Hz, 3H), 0.99 (t,  $J = 7.1$  Hz, 3H).  $^{13}\text{C-NMR}$  ( $\text{CDCl}_3$ , 75 MHz)  $\delta$  170.7, 170.3, 153.2, 141.5, 110.2, 107.1, 76.6, 62.0, 61.9, 53.8, 45.1, 39.8, 19.9, 13.9, 13.6. FTIR (ATR,  $\text{cm}^{-1}$ ): 1727 (C=O st). MS (70 eV)  $m/z$  (%): 222 ( $\text{M}^+ - \text{CO}_2\text{Et}$ , 100), 201 (7), 176 (3), 149 (20), 127 (24), 106 (25), 91 (3), 79 (6), 67 (1), 55 (8), 41 (1), 29 (6). HRMS: calculated for  $[\text{C}_{15}\text{H}_{22}\text{NO}_5]^+$ : 296.1498 [(M + H) $^+$ ]; found: 296.1498. The ee was determined by HPLC using a Chiralcel OZ3 column [*n*-hexane/*i*-PrOH (95:5)]; flow rate 1.0 mL/min;  $T_{\text{major}} = 8.99$  min,  $T_{\text{minor}} = 11.09$  min (86% ee).  $[\alpha]_{\text{D}}^{20}$ : -26.4 ( $c = 1.01$ ,  $\text{CH}_2\text{Cl}_2$ ).

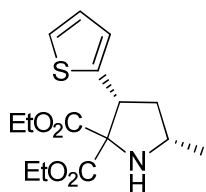

#### (3S,5S)-Diethyl 5-methyl-3-(thiophen-2-yl)pyrrolidine-2,2-dicarboxylate, (4n).

The pyrrolidine **4n** (101 mg, 0.32 mmol, 81%) was obtained after 120 hours as a yellow oil, after isolation by flash column chromatography (hexanes/EtOAc gradient from 8:2 to 7:3)

according to the general procedure using diethyl 2-aminomalonate **1a** (98 mg, 0.56 mmol) and (*E*)-4-(thiophen-2-yl)but-3-en-2-one **2n** (62 mg, 0.40 mmol) in the presence of trifluoroacetic acid (18 mg, 0.16 mmol), 9-epi-9-amino-9-deoxycinchonidine **3a** (23 mg, 0.08 mmol) and using CHCl<sub>3</sub> (2 mL) as solvent, followed by the reduction using sodium cyanoborohydride (50 mg, 0.80 mmol) and EtOH as solvent (15 mL). <sup>1</sup>H-NMR (CDCl<sub>3</sub>, 300 MHz) δ 7.13 (dd, *J* = 5.0, 1.2 Hz, 1H), 6.97-6.88 (m, 2H), 4.51 (dd, *J* = 11.4, 6.7 Hz, 1H), 4.35 (dq, *J* = 10.7, 7.1 Hz, 1H), 4.17 (dq, *J* = 10.7, 7.1 Hz, 1H), 3.89 (dq, *J* = 10.7, 7.1 Hz, 1H), 3.62 (dq, *J* = 10.7, 7.1 Hz, 1H), 3.36-3.18 (m, 1H), 2.56 (bs, 1H), 2.38 (ddd, *J* = 12.1, 6.7, 5.4 Hz, 1H), 1.84-1.71 (m, 1H), 1.34 (d, *J* = 6.2 Hz, 3H), 1.26 (t, *J* = 7.1 Hz, 3H), 0.88 (t, *J* = 7.1 Hz, 3H). <sup>13</sup>C-NMR (CDCl<sub>3</sub>, 75 MHz) δ 168.9, 168.2, 140.5, 124.3, 123.5, 121.9, 75.4, 59.8, 59.7, 51.4, 44.3, 40.3, 17.9, 11.9, 11.4. FTIR (ATR, cm<sup>-1</sup>): 1724 (C=O st). MS (70 eV) *m/z* (%): 238 (M<sup>+</sup> - CO<sub>2</sub>Et, 100), 201 (8), 190 (1), 176 (1), 165 (18), 155 (20), 137 (4), 127 (24), 110 (4), 97 (7), 82 (3), 68 (2), 55 (8), 45 (4), 29 (6). HRMS: calculated for [C<sub>15</sub>H<sub>22</sub>NO<sub>4</sub>S]<sup>+</sup>: 312.1270 [(M + H)<sup>+</sup>]; found: 312.1269. The ee was determined by HPLC using a Chiralcel OZ3 column [*n*-hexane/*i*-PrOH (95:5)]; flow rate 1.0 mL/min; T<sub>major</sub> = 8.11 min, T<sub>minor</sub> = 10.00 min (87% ee). [α]<sub>D</sub><sup>20</sup>: -22.4 (*c* = 0.97, CH<sub>2</sub>Cl<sub>2</sub>).

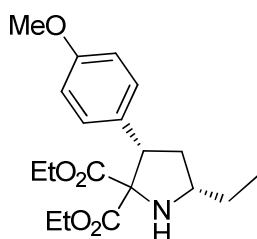

### (3*S*,5*S*)-Diethyl 5-ethyl-3-(4-methoxyphenyl)pyrrolidine-2,2-dicarboxylate, (**4o**).

The pyrrolidine **4o** (92 mg, 0.26 mmol, 65%) was obtained after 168 hours as a colourless oil, after isolation by flash column chromatography (hexanes/EtOAc 8:2) according to the general procedure using diethyl 2-aminomalonate **1a** (98 mg, 0.56 mmol) and (*E*)-4-(4-methoxyphenyl)pent-3-en-2-one **2o** (76 mg, 0.40 mmol) in the presence of methanesulfonic acid (15 mg, 0.16 mmol), 9-epi-9-amino-9-deoxycinchonidine **3a** (23 mg, 0.08 mmol) and using THF (2 mL) as solvent, followed by the reduction using sodium cyanoborohydride (50 mg, 0.80 mmol) and EtOH as solvent (15 mL). <sup>1</sup>H-NMR (CDCl<sub>3</sub>, 300 MHz) δ 7.28-7.20 (m, 2H), 6.81-6.74 (m, 2H), 4.31 (dq, *J* = 10.8, 7.1 Hz, 1H), 4.23-4.08 (m, 2H), 3.86-3.73 (m, 4H), 3.50 (dq, *J* = 10.7, 7.2 Hz, 1H), 3.08-2.98 (m, 1H), 2.75 (bs, 1H), 2.28 (ddd, *J* = 12.6, 7.3, 5.6 Hz, 1H), 1.87-1.72 (m, 1H), 1.70-1.66 (m, 1H), 1.64-1.48 (m, 1H), 1.23 (t, *J* = 7.1 Hz, 3H), 0.97 (t, *J* = 7.5 Hz, 3H), 0.78 (t, *J* = 7.1 Hz, 3H). <sup>13</sup>C-NMR (CDCl<sub>3</sub>, 75 MHz) δ 171.4, 170.4, 158.6, 132.3, 129.6, 113.3, 77.4, 61.7, 61.4, 59.5, 55.3, 49.4, 39.3, 28.2, 14.0, 13.4, 11.4. FTIR (ATR, cm<sup>-1</sup>): 1722 (C=O st). MS (70 eV) *m/z* (%): 276 (M<sup>+</sup> - CO<sub>2</sub>Et, 100), 246 (1), 230 (1), 216 (1), 203 (7), 186 (2), 169 (16), 141 (13), 121 (3), 104 (1), 91 (3), 69 (3), 54 (1), 29 (4). HRMS: calculated for [C<sub>19</sub>H<sub>28</sub>NO<sub>5</sub>]<sup>+</sup>: 350.1967 [(M + H)<sup>+</sup>]; found: 350.1948. The ee was determined by HPLC using a Chiralpak ASH column [*n*-hexane/*i*-PrOH (95:5)]; flow rate 1.0 mL/min; T<sub>major</sub> = 4.66 min, T<sub>minor</sub> = 6.86 min (89% ee). [α]<sub>D</sub><sup>20</sup>: -24.1 (*c* = 1.02, CH<sub>2</sub>Cl<sub>2</sub>).

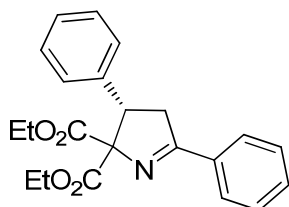

**(3S)-Diethyl 3,5-diphenyl-3,4-dihydro-2H-pyrrole-2,2-dicarboxylate, (4p).**

The pyrroline **4p** (34 mg, 0.09 mmol, 31%) was obtained after 192 hours as a yellow oil, after isolation by flash column chromatography (hexanes/EtOAc gradient from 8:2 to 7:3) according to the general procedure using diethyl 2-aminomalonate **1a** (74 mg, 0.42 mmol) and (*E*)-1,3-diphenyl-2-propen-1-one **2p** (62 mg, 0.30 mmol) in the presence of methanesulfonic acid (12 mg, 0.12 mmol), 9-*epi*-9-amino-9-deoxycinchonidine **3a** (18 mg, 0.06 mmol) and using THF (1.5 mL) as solvent. <sup>1</sup>H-NMR (CDCl<sub>3</sub>, 300 MHz) δ 8.02-7.96 (m, 2H), 7.52-7.40 (m, 3H), 7.27-7.17 (m, 5H), 4.54 (dd, *J* = 9.0, 5.6 Hz, 1H), 4.40 (dq, *J* = 10.7, 7.1 Hz, 1H), 4.21 (dq, *J* = 10.7, 7.1 Hz, 1H), 3.81 (dq, *J* = 10.7, 7.1 Hz, 1H), 3.71-3.54 (m, 2H), 3.40 (dd, *J* = 17.4, 5.6 Hz, 1H), 1.30 (t, *J* = 7.1 Hz, 3H), 0.84 (t, *J* = 7.1 Hz, 3H). <sup>13</sup>C-NMR (CDCl<sub>3</sub>, 75 MHz) δ 177.6, 168.9, 167.5, 139.5, 133.1, 131.5, 128.4, 128.3, 128.2, 128.1, 127.2, 91.5, 62.1, 61.1, 48.3, 43.6, 13.9, 13.4. FTIR (ATR, cm<sup>-1</sup>): 1729 (C=O st). MS (70 eV) *m/z* (%): 365 (1), 292 (M<sup>+</sup> - CO<sub>2</sub>Et, 100), 246 (12), 233 (15), 219 (37), 191 (11), 187 (90), 165 (4), 140 (4), 115 (24), 105 (62), 91 (7), 77 (17), 65 (2). HRMS: calculated for [C<sub>22</sub>H<sub>24</sub>NO<sub>4</sub>]<sup>+</sup>: 366.1705 [(M + H)<sup>+</sup>]; found: 366.1701. The ee was determined by HPLC using a Chiralpak IA column [*n*-hexane/*i*-PrOH (97:3)]; flow rate 1.0 mL/min; T<sub>major</sub> = 33.56 min, T<sub>minor</sub> = 24.49 min (58% ee).

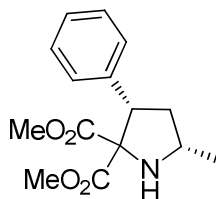

**(3S,5S)-Dimethyl 5-methyl-3-phenylpyrrolidine-2,2-dicarboxylate, (4r).**

The pyrrolidine **4r** (101 mg, 0.37 mmol, 91%) was obtained after 41 hours as a colourless oil, after isolation by flash column chromatography (hexanes/EtOAc 8:2) according to the general procedure using dimethyl 2-aminomalonate **1b** (82 mg, 0.56 mmol) and (*E*)-4-phenylbut-3-en-2-one **2a** (59 mg, 0.40 mmol) in the presence of methanesulfonic acid (15 mg, 0.16 mmol), 9-*epi*-9-amino-9-deoxycinchonidine **3a** (23 mg, 0.08 mmol) and using THF (2 mL) as solvent, followed by the reduction using sodium cyanoborohydride (50 mg, 0.80 mmol) and EtOH as solvent (15 mL). <sup>1</sup>H-NMR (CDCl<sub>3</sub>, 300 MHz) δ 7.33-7.07 (m, 5H), 4.30 (dd, *J* = 11.3, 7.1 Hz, 1H), 3.75 (s, 3H), 3.30-3.17 (m, 1H), 3.12 (s, 3H), 2.80 (bs, 1H), 2.35-2.21 (m, 1H), 1.80-1.69 (m, 1H), 1.34 (d, *J* = 6.1 Hz, 3H). <sup>13</sup>C-NMR (CDCl<sub>3</sub>, 75 MHz) δ 171.8, 170.7, 139.7, 128.4, 128.1, 127.0, 78.1, 53.9, 53.1, 52.3, 51.3, 41.5, 19.8. FTIR (ATR, cm<sup>-1</sup>): 1727 (C=O st). MS (70 eV) *m/z* (%): 218 (M<sup>+</sup> - CO<sub>2</sub>Me, 100), 184 (2), 173 (6), 158 (11), 141 (18), 131 (9), 116 (47), 103 (3), 91 (8), 77 (4), 68 (3), 59 (4), 42 (3), 28 (2). HRMS: calculated for [C<sub>15</sub>H<sub>20</sub>NO<sub>4</sub>]<sup>+</sup>: 278.1392 [(M + H)<sup>+</sup>]; found: 278.1380. The ee was determined by HPLC using a Chiralpak IA column [*n*-hexane/*i*-PrOH (98:2)]; flow rate 1.0 mL/min; T<sub>major</sub> = 11.86 min, T<sub>minor</sub> = 10.17 min (90% ee). [α]<sub>D</sub><sup>20</sup>: -28.0 (*c* = 1.00, CH<sub>2</sub>Cl<sub>2</sub>).

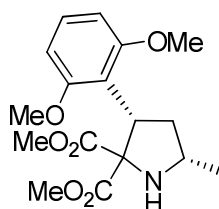

**(3S,5S)-Dimethyl 3-(2,6-dimethoxyphenyl)-5-methylpyrrolidine-2,2-dicarboxylate, (4s).**

The pyrrolidine **4s** (91 mg, 0.27 mmol, 67%) was obtained after 72 hours as a white solid, after isolation by flash column chromatography (hexanes/EtOAc gradient from 6:4 to 4:6) according to the general procedure using dimethyl 2-aminomalonate **1b** (82 mg, 0.56 mmol) and (*E*)-4-(2,6-dimethoxyphenyl)but-3-en-2-one **2f** (82 mg, 0.40 mmol) in the presence of methanesulfonic acid (15 mg, 0.16 mmol), 9-*epi*-9-amino-9-deoxycinchonidine **3a** (23 mg, 0.08 mmol) and using THF (2 mL) as solvent, followed by the reduction using sodium cyanoborohydride (50 mg, 0.80 mmol) and EtOH as solvent (15 mL). M.p.: 118-120°C (hexanes/EtOAc 6:4). <sup>1</sup>H-NMR (CDCl<sub>3</sub>, 300 MHz) δ 7.11 (t, *J* = 8.3 Hz, 1H), 6.50 (d, *J* = 8.3 Hz, 2H), 5.18-5.12 (m, 1H), 3.78 (s, 6H), 3.76 (s, 3H), 3.25-3.14 (m, 4H), 2.18 (ddd, *J* = 12.0, 9.1, 6.6 Hz, 1H), 1.93 (ddd, *J* = 12.0, 10.4, 9.1 Hz, 1H), 1.33 (d, *J* = 6.2 Hz, 3H). <sup>13</sup>C-NMR (CDCl<sub>3</sub>, 75 MHz) δ 171.6, 169.7, 158.5, 127.7, 118.2, 104.1, 78.7, 55.6, 54.8, 53.2, 51.8, 40.9, 40.0, 19.5. FTIR (ATR, cm<sup>-1</sup>): 1727 (C=O st). MS (70 eV) *m/z* (%): 278 (M<sup>+</sup> - CO<sub>2</sub>Me, 100), 246 (11), 231 (22), 216 (8), 204 (3), 191 (4), 176 (11), 161 (3), 141 (25), 113 (20), 91 (16), 77 (3), 59 (3), 42 (2), 28 (1). HRMS: calculated for [C<sub>17</sub>H<sub>24</sub>NO<sub>6</sub>]<sup>+</sup>: 338.1604 [(M + H)<sup>+</sup>]; found: 338.1595. The ee was determined by HPLC using a Chiralpak ASH column [*n*-hexane/*i*-PrOH (95:5)]; flow rate 1.0 mL/min; τ<sub>major</sub> = 7.71 min, τ<sub>minor</sub> = 6.47 min (80% ee). [α]<sub>D</sub><sup>20</sup>: -17.5 (*c* = 0.66, CH<sub>2</sub>Cl<sub>2</sub>). M.p.: 118-120°C (hexanes/EtOAc).

### General procedure for the Synthesis of Prolines (5a-o, 5r and 5s).

MeLi (1.00 mmol) was added dropwise to a solution of the corresponding pyrrolidine **4** (1.00 mmol) in THF (10 mL) at -78°C under inert atmosphere. The reaction was stirred at -78°C during 1 hour and then the reaction was quenched with the dropwise addition of water (1 mL) at -78°C. The reaction mixture was warmed to room temperature, then brine (5 mL) was added and the mixture was extracted with EtOAc (3 × 5 mL). The combined organic layers were dried over anhydrous Na<sub>2</sub>SO<sub>4</sub>, filtered, and the solvent was removed under reduced pressure. The obtained crude product was purified by flash column chromatography (hexanes/EtOAc gradient from 9.5:0.5 to 7:3) yielding the desired product **5**.

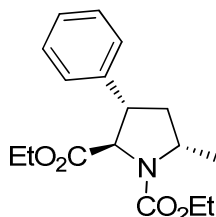

#### (2R,3S,5S)-Diethyl 5-methyl-3-phenylpyrrolidine-1,2-dicarboxylate, (**5a**).

The pyrrolidine **5a** (44 mg, 0.14 mmol, 84%, dr: 7:1) was obtained after 1 hour as a colourless oil, after isolation by flash column chromatography (hexanes/EtOAc gradient from 9.5:0.5 to 7:3) according to the general procedure starting from pyrrolidine **4a** (52 mg, 0.17 mmol), methyllithium (0.12 mL of a 1.46 M solution in diethyl ether, 0.17 mmol) and THF (1.7 mL). <sup>1</sup>H-NMR (CDCl<sub>3</sub>, 300 MHz) (rotamer ratio 1.4:1, \*denotes minor rotamer signals), δ 7.36-7.23 (m, 5H), 4.51\* (d, *J* = 6.2 Hz, 1H), 4.43 (d, *J* = 6.6 Hz, 1H), 4.25-4.03 (m, 5H), 3.48-3.31 (m, 1H), 2.66-2.43 (m, 1H), 1.90-1.74 (m, 1H), 1.40-1.14 (m, 9H). <sup>13</sup>C-NMR (CDCl<sub>3</sub>, 75 MHz) (\*denotes minor rotamer signals), δ 172.6, 172.2\*, 155.4\*, 154.5, 140.7, 140.6\*, 128.7, 127.1, 127.1, 66.7, 66.4\*, 61.4\*, 61.0, 60.9, 55.1, 54.2\*, 47.9, 47.1\*, 41.7\*, 41.4, 21.5\*, 20.3, 14.6\*, 14.5, 14.2, 14.1\*. FTIR (ATR, cm<sup>-1</sup>): 1742 (C=O st), 1708 (NC=O st). MS (70 eV) *m/z* (%): 305 (1), 260 (1), 232 (M<sup>+</sup> - CO<sub>2</sub>Et, 100), 216 (2), 204 (10), 188 (12), 172 (1), 160 (29), 144 (4), 129 (7), 117 (16), 104 (3), 91 (9), 77 (2), 55 (2). HRMS: calculated for [C<sub>17</sub>H<sub>24</sub>NO<sub>4</sub>]<sup>+</sup>: 306.1705 [(M + H)<sup>+</sup>]; found: 306.1699. [ $\alpha$ ]<sub>D</sub><sup>20</sup>: -51.2 (*c* = 0.44, CH<sub>2</sub>Cl<sub>2</sub>).

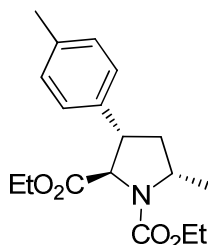

#### (2R,3S,5S)-Diethyl 5-methyl-3-*p*-tolylpyrrolidine-1,2-dicarboxylate, (**5b**).

The pyrrolidine **5b** (26 mg, 0.08 mmol, 80%, dr: 10:1) was obtained after 1 hour as a colourless oil, after isolation by flash column chromatography (hexanes/EtOAc gradient from 9.5:0.5 to 7:3) according to the general procedure starting from pyrrolidine **4b** (32 mg, 0.10 mmol), methyllithium (0.07 mL of a 1.48 M solution in diethyl ether, 0.10 mmol) and THF (1.0 mL). <sup>1</sup>H-NMR (CDCl<sub>3</sub>, 300 MHz) (rotamer ratio 1.4:1, \*denotes minor rotamer signals), δ 7.19-7.09 (m, 4H), 4.47\* (d, *J* = 6.7 Hz, 1H), 4.40 (d, *J* = 6.9 Hz, 1H), 4.26-4.00

(m, 5H), 3.41-3.30 (m, 1H), 2.63-2.42 (m, 1H), 2.33 (s, 3H), 1.90-1.69 (m, 1H), 1.42-1.13 (m, 9H). <sup>13</sup>C-NMR (CDCl<sub>3</sub>, 75 MHz) (\*denotes minor rotamer signals), δ 172.6, 172.3\*, 155.4\*, 154.5, 137.6, 137.5\*, 136.8, 136.7\*, 129.3, 127.0, 66.8, 66.5\*, 61.3\*, 61.0, 60.9, 55.1, 54.2\*, 47.6, 46.7\*, 41.8\*, 41.5, 21.5\*, 21.0, 20.3, 14.6\*, 14.5, 14.2, 14.1\*. FTIR (ATR, cm<sup>-1</sup>): 1743 (C=O st), 1710 (NC=O st). MS (70 eV) *m/z* (%): 319 (2), 246 (M<sup>+</sup> - CO<sub>2</sub>Et, 100), 230 (4), 218 (11), 202 (12), 186 (1), 174 (29), 158 (5), 145 (5), 131 (20), 117 (7), 105 (6), 91 (7), 77 (2), 55 (2). HRMS: calculated for [C<sub>18</sub>H<sub>26</sub>NO<sub>4</sub>]<sup>+</sup>: 320.1862 [(M + H)<sup>+</sup>]; found: 320.1852. [α]<sub>D</sub><sup>20</sup>: -63.2 (c = 0.61, CH<sub>2</sub>Cl<sub>2</sub>).

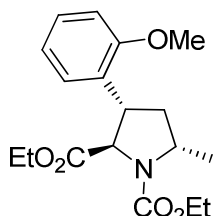

**(2R,3S,5S)-Diethyl 3-(2-methoxyphenyl)-5-methylpyrrolidine-1,2-dicarboxylate, (5c).**

The pyrrolidine **5c** (30 mg, 0.09 mmol, 78%, dr: >20:1) was obtained after 1 hour as a colourless oil, after isolation by flash column chromatography (hexanes/EtOAc gradient from 9.5:0.5 to 7:3) according to the general procedure starting from pyrrolidine **4c** (38 mg, 0.12 mmol), methyllithium (0.08 mL of a 1.40 M solution in diethyl ether, 0.12 mmol) and THF (1.2 mL). <sup>1</sup>H-NMR (CDCl<sub>3</sub>, 300 MHz) (rotamer ratio 1.4:1, \*denotes minor rotamer signals), δ 7.29-7.19 (m, 2H), 6.95-6.90 (m, 1H), 6.86 (d, *J* = 8.1 Hz, 1H), 4.63\* (d, *J* = 5.4 Hz, 1H), 4.51 (d, *J* = 5.9 Hz, 1H), 4.27-4.01 (m, 5H), 3.82 (s, 3H), 3.77-3.65 (m, 1H), 2.62-2.41 (m, 1H), 1.86-1.72 (m, 1H), 1.35-1.14 (m, 9H). <sup>13</sup>C-NMR (CDCl<sub>3</sub>, 75 MHz) (\*denotes minor rotamer signals), δ 172.8, 172.5\*, 157.0, 155.6\*, 154.7, 129.3\*, 129.1, 128.1, 128.0\*, 127.1, 120.5, 120.4\*, 110.5, 110.4\*, 65.2, 65.0\*, 61.3\*, 60.9, 60.8, 55.2, 55.0, 54.1\*, 41.8, 41.1\*, 39.7\*, 39.3, 21.7\*, 20.6, 14.6\*, 14.5, 14.2, 14.1\*. FTIR (ATR, cm<sup>-1</sup>): 1743 (C=O st), 1705 (NC=O st). MS (70 eV) *m/z* (%): 335 (7), 289 (4), 262 (M<sup>+</sup> - CO<sub>2</sub>Et, 100), 246 (3), 233 (5), 218 (8), 203 (1), 190 (34), 174 (5), 161 (5), 147 (11), 131 (8), 115 (5), 91 (14), 77 (3), 55 (2). HRMS: calculated for [C<sub>18</sub>H<sub>26</sub>NO<sub>5</sub>]<sup>+</sup>: 336.1811 [(M + H)<sup>+</sup>]; found: 336.1808. [α]<sub>D</sub><sup>20</sup>: -54.0 (c = 1.20, CH<sub>2</sub>Cl<sub>2</sub>).

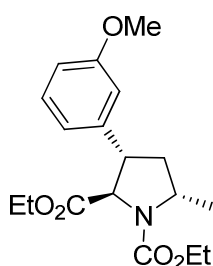

**(2R,3S,5S)-Diethyl 3-(3-methoxyphenyl)-5-methylpyrrolidine-1,2-dicarboxylate, (5d).**

The pyrrolidine **5d** (14 mg, 0.04 mmol, 77%, dr: >20:1) was obtained after 1 hour as a colourless oil, after isolation by flash column chromatography (hexanes/EtOAc gradient from 9.5:0.5 to 7:3) according to the general procedure starting from pyrrolidine **4d** (18 mg, 0.05 mmol), methyllithium (0.04 mL, 1.53 M solution in diethyl ether, 0.05 mmol) and THF (0.5 mL). <sup>1</sup>H-NMR (CDCl<sub>3</sub>, 300 MHz) (rotamer ratio 1.4:1, \*denotes minor rotamer signals), δ 7.28-7.20 (m, 1H), 6.85 (d, *J* = 7.7 Hz, 1H), 6.82-6.75 (m, 2H), 4.49\* (d, *J* = 6.6 Hz, 1H),

4.43 (d,  $J = 6.8$  Hz, 1H), 4.26-4.01 (m, 5H), 3.80 (s, 3H), 3.41-3.32 (m, 1H), 2.62-2.47 (m, 1H), 1.90-1.71 (m, 1H), 1.45-1.11 (m, 9H).  $^{13}\text{C-NMR}$  ( $\text{CDCl}_3$ , 75 MHz) (\*denotes minor rotamer signals),  $\delta$  172.6, 172.2\*, 159.8, 155.4\*, 154.5, 142.4, 142.3\*, 129.6, 119.4, 113.3, 113.2\*, 112.1, 66.6, 66.4\*, 61.4\*, 61.1, 61.0, 60.9\*, 55.2, 55.0, 54.2\*, 47.8, 47.0\*, 41.7\*, 41.3, 21.5\*, 20.4, 14.6\*, 14.5, 14.2, 14.1\*. FTIR (ATR,  $\text{cm}^{-1}$ ): 1742 (C=O st), 1705 (NC=O st). MS (70 eV)  $m/z$  (%): 335 (1), 262 ( $\text{M}^+ - \text{CO}_2\text{Et}$ , 100), 246 (4), 234 (5), 218 (7), 206 (2), 190 (18), 174 (2), 162 (3), 147 (6), 134 (3), 121 (3), 103 (1), 91 (4), 78 (1), 65 (1). HRMS: calculated for  $[\text{C}_{18}\text{H}_{26}\text{NO}_5]^+$ : 336.1811 [(M + H) $^+$ ]; found: 336.1798.  $[\alpha]_{\text{D}}^{20}$ : -47.5 ( $c = 0.99$ ,  $\text{CH}_2\text{Cl}_2$ ).

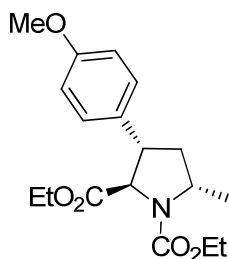

**(2R,3S,5S)-Diethyl 3-(4-methoxyphenyl)-5-methylpyrrolidine-1,2-dicarboxylate, (5e).**

The pyrrolidine **5e** (52 mg, 0.16 mmol, 73%, dr: 6:1) was obtained after 1 hour as a colourless oil, after isolation by flash column chromatography (hexanes/EtOAc gradient from 9.5:0.5 to 7:3) according to the general procedure starting from pyrrolidine **4e** (71 mg, 0.21 mmol), methyllithium (0.16 mL of a 1.35 M solution in diethyl ether, 0.21 mmol) and THF (2.1 mL).  $^1\text{H-NMR}$  ( $\text{CDCl}_3$ , 300 MHz) (rotamer ratio 1.4:1, \*denotes minor rotamer signals),  $\delta$  7.17 (d,  $J = 8.6$  Hz, 2H), 6.86 (d,  $J = 8.5$  Hz, 2H), 4.43\* (d,  $J = 6.8$  Hz, 1H), 4.35 (d,  $J = 6.9$  Hz, 1H), 4.26-4.01 (m, 5H), 3.79 (s, 3H), 3.39-3.29 (m, 1H), 2.60-2.41 (m, 1H), 1.87-1.69 (m, 1H), 1.43-1.13 (m, 9H).  $^{13}\text{C-NMR}$  ( $\text{CDCl}_3$ , 75 MHz) (\*denotes minor rotamer signals),  $\delta$  172.6, 172.2\*, 158.7, 155.4\*, 154.4, 132.5, 132.4\*, 128.1, 114.0, 67.0, 66.7\*, 61.3\*, 61.0, 60.9, 55.3, 55.0, 54.1\*, 47.2, 46.4\*, 41.9\*, 41.6, 21.5\*, 20.3, 14.6\*, 14.5, 14.2, 14.1\*. FTIR (ATR,  $\text{cm}^{-1}$ ): 1742 (C=O st), 1705 (NC=O st). MS (70 eV)  $m/z$  (%): 335 (5), 262 ( $\text{M}^+ - \text{CO}_2\text{Et}$ , 100), 246 (2), 233 (9), 218 (6), 206 (5), 190 (17), 174 (3), 161 (5), 147 (15), 134 (5), 116 (9), 103 (2), 91 (7), 77 (2), 55 (2). HRMS: calculated for  $[\text{C}_{18}\text{H}_{26}\text{NO}_5]^+$ : 336.1811 [(M + H) $^+$ ]; found: 336.1795.  $[\alpha]_{\text{D}}^{20}$ : -57.4 ( $c = 1.04$ ,  $\text{CH}_2\text{Cl}_2$ ).

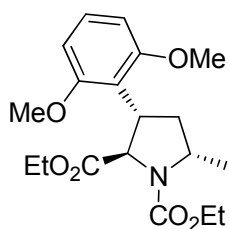

**(2R,3S,5S)-Diethyl 3-(2,6-dimethoxyphenyl)-5-methylpyrrolidine-1,2-dicarboxylate, (5f).**

The pyrrolidine **5f** (32 mg, 0.09 mmol, 73%, dr: 3:1) was obtained after 1 hour as a colourless oil, after isolation by flash column chromatography (hexanes/EtOAc gradient from 9.5:0.5 to 7:3) according to the general procedure starting from pyrrolidine **4f** (44 mg, 0.12 mmol), methyllithium (0.09 mL of a 1.31 M solution in diethyl ether, 0.12 mmol) and THF (1.2 mL).  $^1\text{H-NMR}$  ( $\text{CDCl}_3$ , 300 MHz) (rotamer ratio 1.3:1, \*denotes minor rotamer



signals),  $\delta$  7.16 (t,  $J = 8.3$  Hz, 1H), 6.50 (d,  $J = 8.3$  Hz, 2H), 4.62\* (d,  $J = 8.5$  Hz, 1H), 4.48 (d,  $J = 8.6$  Hz, 1H), 4.29-3.78 (m, 6H), 3.75 (s, 6H), 2.96-2.72 (m, 1H), 2.21-1.96 (m, 1H), 1.55-1.50 (m, 3H), 1.29\* (t;  $J = 7.1$  Hz, 3H), 1.19 (t,  $J = 7.1$  Hz, 3H), 0.98 (t,  $J = 7.1$  Hz, 3H), 0.91\* (t,  $J = 7.1$  Hz, 3H).  $^{13}\text{C-NMR}$  ( $\text{CDCl}_3$ , 75 MHz) (\*denotes minor rotamer signals),  $\delta$  171.4\*, 171.3, 159.6, 155.6\*, 154.7, 128.3, 128.2\*, 112.7\*, 112.6, 103.8, 62.8\*, 62.5, 61.0\*, 60.8, 60.2, 55.4, 54.5, 54.0\*, 38.0, 37.8\*, 35.8\*, 35.1, 21.2\*, 20.1, 14.6, 13.8, 13.7\*. FTIR (ATR,  $\text{cm}^{-1}$ ): 1744 (C=O st), 1698 (NC=O st). MS (70 eV)  $m/z$  (%): 292 ( $\text{M}^+ - \text{CO}_2\text{Et}$ , 100), 263 (1), 246 (1), 220 (11), 204 (2), 191 (2), 177 (3), 161 (4), 147 (3), 132 (1), 121 (3), 103 (1), 91 (5), 79 (1), 68 (1), 56 (1). HRMS: calculated for  $[\text{C}_{19}\text{H}_{28}\text{NO}_6]^+$ : 366.1917 [(M + H) $^+$ ]; found: 366.1907.  $[\alpha]_{\text{D}}^{20}$ : 54.6 ( $c = 1.01$ ,  $\text{CH}_2\text{Cl}_2$ ).

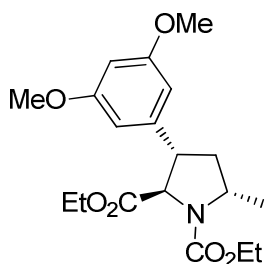

**(2R,3S,5S)-Diethyl 3-(3,5-dimethoxyphenyl)-5-methylpyrrolidine-1,2-dicarboxylate, (5g).**

The pyrrolidine **5g** (52 mg, 0.14 mmol, 84%, dr: 10:1) was obtained after 1 hour as a colourless oil, after isolation by flash column chromatography (hexanes/EtOAc gradient from 9.5:0.5 to 7:3) according to the general procedure starting from pyrrolidine **4g** (61 mg, 0.17 mmol), methyllithium (0.11 mL of a 1.48 M solution in diethyl ether, 0.17 mmol) and THF (1.7 mL).  $^1\text{H-NMR}$  ( $\text{CDCl}_3$ , 300 MHz) (rotamer ratio 1.5:1, \*denotes minor rotamer signals),  $\delta$  6.42 (d,  $J = 2.0$  Hz, 2H), 6.35 (t,  $J = 2.0$  Hz, 1H), 4.47\* (d,  $J = 6.7$  Hz, 1H), 4.41 (d,  $J = 6.6$  Hz, 1H), 4.27-3.99 (m, 5H), 3.78 (s, 6H), 3.40-3.25 (m, 1H), 2.63-2.42 (m, 1H), 1.89-1.69 (m, 1H), 1.46-1.12 (m, 9H).  $^{13}\text{C-NMR}$  ( $\text{CDCl}_3$ , 75 MHz) (\*denotes minor rotamer signals),  $\delta$  172.6, 172.2\*, 161.0, 155.4\*, 154.5, 143.2, 143.0\*, 105.4, 98.8\*, 98.7, 66.5, 66.4\*, 61.4\*, 61.1, 61.0, 60.9\*, 55.3, 55.0, 54.1\*, 48.0, 47.2\*, 41.6\*, 41.2, 21.5\*, 20.4, 14.6\*, 14.4, 14.2, 14.1\*. FTIR (ATR,  $\text{cm}^{-1}$ ): 1742 (C=O st), 1703 (NC=O st). MS (70 eV)  $m/z$  (%): 365 (8), 319 (2), 292 ( $\text{M}^+ - \text{CO}_2\text{Et}$ , 100), 264 (2), 248 (5), 220 (11), 203 (2), 177 (4), 161 (2), 145 (1), 119 (1), 91 (1), 77 (1), 55 (1). HRMS: calculated for  $[\text{C}_{19}\text{H}_{28}\text{NO}_6]^+$ : 366.1917 [(M + H) $^+$ ]; found: 366.1394.  $[\alpha]_{\text{D}}^{20}$ : -47.7 ( $c = 0.65$ ,  $\text{CH}_2\text{Cl}_2$ ).

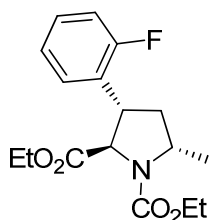

**(2R,3S,5S)-Diethyl 3-(2-fluorophenyl)-5-methylpyrrolidine-1,2-dicarboxylate, (5h).**

The pyrrolidine **5h** (50 mg, 0.15 mmol, 85%, dr: 17:1) was obtained after 1 hour as a colourless oil, after isolation by flash column chromatography (hexanes/EtOAc gradient from 9.5:0.5 to 7:3) according to the general procedure starting from pyrrolidine **4h** (59 mg, 0.18 mmol), methyllithium (0.13 mL of a 1.40 M solution in diethyl ether, 0.18 mmol) and

THF (1.8 mL).  $^1\text{H-NMR}$  ( $\text{CDCl}_3$ , 300 MHz) (rotamer ratio 1.4:1, \*denotes minor rotamer signals),  $\delta$  7.34-7.29 (m, 1H), 7.26-7.19 (m, 1H), 7.14-7.09 (m, 1H), 7.07-6.98 (m, 1H), 4.59\* (d,  $J = 6.0$  Hz, 1H), 4.47 (d,  $J = 6.4$  Hz, 1H), 4.29-4.01 (m, 5H), 3.68-3.60 (m, 1H), 2.66-2.44 (m, 1H), 1.91-1.74 (m, 1H), 1.41-1.12 (m, 9H).  $^{13}\text{C-NMR}$  ( $\text{CDCl}_3$ , 75 MHz) (\*denotes minor rotamer signals),  $\delta$  172.3, 171.9\*, 160.8 (d,  $^1J_{\text{CF}} = 246.2$  Hz), 155.5\*, 154.5, 128.8 (d,  $^3J_{\text{CF}} = 8.2$  Hz), 128.7\* (d,  $^3J_{\text{CF}} = 8.3$  Hz), 127.9 (d,  $^3J_{\text{CF}} = 3.6$  Hz), 127.8 (d,  $^2J_{\text{CF}} = 26.7$  Hz), 124.3 (d,  $^4J_{\text{CF}} = 3.4$  Hz), 115.6 (d,  $^2J_{\text{CF}} = 22.2$  Hz), 115.5\* (d,  $^2J_{\text{CF}} = 22.2$  Hz), 65.4, 65.1\*, 61.4\*, 61.2, 61.1, 61.0\*, 55.0, 54.0\*, 41.2, 40.4\*, 40.2\*, 39.8, 21.5\*, 20.4, 14.6\*, 14.5, 14.1, 14.0\*. FTIR (ATR,  $\text{cm}^{-1}$ ): 1746 (C=O st), 1709 (NC=O st). MS (70 eV)  $m/z$  (%): 323 (4), 250 ( $\text{M}^+ - \text{CO}_2\text{Et}$ , 100), 234 (1), 222 (10), 206 (17), 190 (1), 178 (42), 162 (5), 150 (4), 135 (14), 122 (3), 109 (11), 96 (1), 83 (1), 56 (1). HRMS: calculated for  $[\text{C}_{17}\text{H}_{23}\text{FNO}_4]^+$ : 324.1611 [(M + H) $^+$ ]; found: 324.1603.  $[\alpha]_{\text{D}}^{20}$ : -46.8 ( $c = 1.36$ ,  $\text{CH}_2\text{Cl}_2$ ).

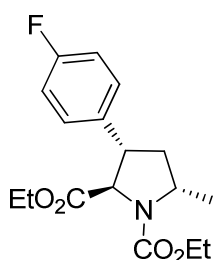

**(2R,3S,5S)-Diethyl 3-(4-fluorophenyl)-5-methylpyrrolidine-1,2-dicarboxylate, (5i).**

The pyrrolidine **5i** (41 mg, 0.13 mmol, 71%, dr: 6:1) was obtained after 1 hour as a colourless oil, after isolation by flash column chromatography (hexanes/EtOAc gradient from 9.5:0.5 to 7:3) according to the general procedure starting from pyrrolidine **4i** (58 mg, 0.18 mmol), methyllithium (0.13 mL of a 1.35 M solution in diethyl ether, 0.18 mmol) and THF (1.8 mL).  $^1\text{H-NMR}$  ( $\text{CDCl}_3$ , 300 MHz) (rotamer ratio 1.3:1, \*denotes minor rotamer signals),  $\delta$  7.25-7.19 (m, 2H), 7.07-6.95 (m, 2H), 4.43\* (d,  $J = 6.7$  Hz, 1H), 4.36 (d,  $J = 6.9$  Hz, 1H), 4.26-4.02 (m, 5H), 3.41-3.31 (m, 1H), 2.60-2.46 (m, 1H), 1.85-1.68 (m, 1H), 1.43-1.11 (m, 9H).  $^{13}\text{C-NMR}$  ( $\text{CDCl}_3$ , 75 MHz) (\*denotes minor rotamer signals),  $\delta$  172.4, 172.0\*, 161.9 (d,  $^1J_{\text{CF}} = 245.6$  Hz), 155.3\*, 154.4, 136.2, 128.7 (d,  $^3J_{\text{CF}} = 8.0$  Hz), 115.5 (d,  $^2J_{\text{CF}} = 21.4$  Hz), 66.9, 66.7\*, 61.4\*, 61.1, 61.0, 55.0, 54.1\*, 47.2, 46.4\*, 41.9\*, 41.6, 21.4\*, 20.3, 14.6\*, 14.4, 14.2, 14.1\*. FTIR (ATR,  $\text{cm}^{-1}$ ): 1742 (C=O st), 1706 (NC=O st). MS (70 eV)  $m/z$  (%): 323 (1), 250 ( $\text{M}^+ - \text{CO}_2\text{Et}$ , 100), 234 (1), 222 (6), 206 (9), 178 (29), 162 (4), 150 (4), 135 (19), 122 (3), 109 (12), 95 (1), 82 (2), 68 (1), 55 (2). HRMS: calculated for  $[\text{C}_{17}\text{H}_{23}\text{FNO}_4]^+$ : 324.1611 [(M + H) $^+$ ]; found: 324.1593.  $[\alpha]_{\text{D}}^{20}$ : -47.9 ( $c = 1.01$ ,  $\text{CH}_2\text{Cl}_2$ ).

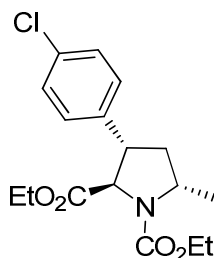

**(2R,3S,5S)-Diethyl 3-(4-chlorophenyl)-5-methylpyrrolidine-1,2-dicarboxylate, (5j).**

The pyrrolidine **5j** (73 mg, 0.21 mmol, 86%, dr: 7:1) was obtained after 1 hour as a colourless oil, after isolation by flash column chromatography (hexanes/EtOAc gradient from 9.5:0.5 to 7:3) according to the general procedure starting from pyrrolidine **4j** (85 mg,

0.25 mmol), methyllithium (0.19 mL of a 1.31 M solution in diethyl ether, 0.25 mmol) and THF (2.5 mL).  $^1\text{H-NMR}$  ( $\text{CDCl}_3$ , 300 MHz) (rotamers ratio 1.3:1, \*denotes minor rotamer signals),  $\delta$  7.30 (d,  $J = 8.4$  Hz, 2H), 7.19 (d,  $J = 8.4$  Hz, 2H), 4.45\* (d,  $J = 6.4$  Hz, 1H), 4.38 (d,  $J = 6.8$  Hz, 1H), 4.27-3.97 (m, 5H), 3.43-3.28 (m, 1H), 2.64-2.44 (m, 1H), 1.87-1.66 (m, 1H), 1.45-1.11 (m, 9H).  $^{13}\text{C-NMR}$  ( $\text{CDCl}_3$ , 75 MHz) (\*denotes minor rotamer signals),  $\delta$  172.3, 172.0\*, 155.3\*, 154.4, 139.2, 139.1\*, 132.9, 128.8, 128.5, 66.6, 66.4\*, 61.5\*, 61.2, 61.1, 61.0\*, 55.0, 54.1\*, 47.3, 46.4\*, 41.7\*, 41.4, 21.5\*, 20.3, 14.6\*, 14.5, 14.2, 14.1\*. FTIR (ATR,  $\text{cm}^{-1}$ ): 1742 (C=O st), 1704 (NC=O st). MS (70 eV)  $m/z$  (%): 339 (1), 266 ( $\text{M}^+ - \text{CO}_2\text{Et}$ , 100), 252 (1), 238 (6), 222 (9), 194 (30), 181 (2), 166 (4), 151 (9), 129 (13), 115 (13), 101 (2), 82 (4), 77 (2), 55 (4). HRMS: calculated for  $[\text{C}_{17}\text{H}_{23}\text{ClNO}_4]^+$ : 340.1316 [(M + H) $^+$ ]; found: 340.1302.  $[\alpha]_D^{20}$ : -78.5 ( $c = 1.00$ ,  $\text{CH}_2\text{Cl}_2$ ).

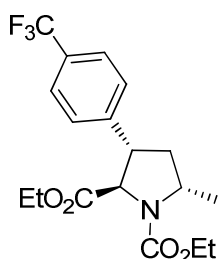

**(2R,3S,5S)-Diethyl 5-methyl-3-(4-(trifluoromethyl)phenyl)pyrrolidine-1,2-dicarboxylate, (5k).**

The pyrrolidine **5k** (39 mg, 0.10 mmol, 80%, dr: 5:1) was obtained after 1 hour as a colourless oil, after isolation by flash column chromatography (hexanes/EtOAc gradient from 9.5:0.5 to 7:3) according to the general procedure starting from pyrrolidine **4k** (49 mg, 0.13 mmol), methyllithium (0.10 mL of a 1.31 M solution in diethyl ether, 0.13 mmol) and THF (1.3 mL).  $^1\text{H-NMR}$  ( $\text{CDCl}_3$ , 300 MHz) (rotamer ratio 1.3:1, \*denotes minor rotamer signals),  $\delta$  7.59 (d,  $J = 8.1$  Hz, 2H), 7.39 (d,  $J = 8.1$  Hz, 2H), 4.53\* (d,  $J = 5.8$  Hz, 1H), 4.45 (d,  $J = 6.4$  Hz, 1H), 4.28-4.01 (m, 5H), 3.53-3.36 (m, 1H), 2.70-2.48 (m, 1H), 1.90-1.71 (m, 1H), 1.44-1.13 (m, 9H).  $^{13}\text{C-NMR}$  ( $\text{CDCl}_3$ , 75 MHz) (\*denotes minor rotamer signals),  $\delta$  172.2, 171.8\*, 155.4\*, 154.4, 144.9, 129.5 (q,  $^2J_{\text{CF}} = 32.7$  Hz), 127.6, 125.6 (q,  $^3J_{\text{CF}} = 3.6$  Hz), 124.0 (q,  $^1J_{\text{CF}} = 272.0$  Hz), 66.5, 66.2\*, 61.5\*, 61.2, 61.1, 61.0\*, 55.0, 54.1\*, 47.5, 46.7\*, 41.6\*, 41.2, 21.5\*, 20.4, 14.6\*, 14.4, 14.2, 14.1\*. FTIR (ATR,  $\text{cm}^{-1}$ ): 1743 (C=O st), 1706 (NC=O st). MS (70 eV)  $m/z$  (%): 373 (1), 300 ( $\text{M}^+ - \text{CO}_2\text{Et}$ , 100), 286 (1), 272 (4), 256 (12), 228 (28), 200 (2), 185 (4), 159 (3), 145 (1), 129 (4), 115 (1), 82 (1), 55 (1). HRMS: calculated for  $[\text{C}_{18}\text{H}_{23}\text{F}_3\text{NO}_4]^+$ : 374.1579 [(M + H) $^+$ ]; found: 374.1565.  $[\alpha]_D^{20}$ : -55.1 ( $c = 1.00$ ,  $\text{CH}_2\text{Cl}_2$ ).

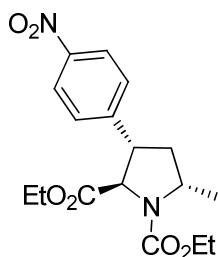

**(2R,3S,5S)-Diethyl 5-methyl-3-(4-nitrophenyl)pyrrolidine-1,2-dicarboxylate, (5l).**

The pyrrolidine **5l** (13 mg, 0.04 mmol, 60%<sup>2</sup>, dr: 7:1) was obtained after 1 hour as a colourless oil, after isolation by flash column chromatography (hexanes/EtOAc gradient from 9.5:0.5 to 7:3) according to the general procedure starting from pyrrolidine **4l** (54 mg, 0.15 mmol), methyllithium (0.10 mL of a 1.53 M solution in diethyl ether, 0.15 mmol) and THF (1.5 mL). <sup>1</sup>H-NMR (CDCl<sub>3</sub>, 300 MHz) (rotamer ratio 1.1:1, \*denotes minor rotamer signals), δ 8.20 (d, *J* = 8.6 Hz, 2H), 7.45 (d, *J* = 8.7 Hz, 2H), 4.55\* (d, *J* = 6.5 Hz, 1H), 4.47 (d, *J* = 6.3 Hz, 1H), 4.27-4.08 (m, 5H), 3.58-3.41 (m, 1H), 2.71-2.51 (m, 1H), 1.89-1.75 (m, 1H), 1.40-1.19 (m, 9H). <sup>13</sup>C-NMR (CDCl<sub>3</sub>, 75 MHz) (\*denotes minor rotamer signals), δ 171.9, 171.6\*, 155.4\*, 154.3, 148.4, 147.1, 128.1, 124.0, 66.3, 66.1\*, 61.6\*, 61.3, 61.3, 61.2\*, 55.0, 54.1\*, 47.5, 46.6\*, 41.6\*, 41.2, 21.5\*, 20.4, 14.6\*, 14.5, 14.2, 14.2\*. FTIR (ATR, cm<sup>-1</sup>): 1742 (C=O st), 1705 (NC=O st), 1521 (NO<sub>2</sub> st as), 1346 (NO<sub>2</sub> st sym). MS (70 eV) *m/z* (%): 277 (M<sup>+</sup> - CO<sub>2</sub>Et, 100), 261 (2), 249 (4), 233 (13), 205 (39), 187 (10), 177 (2), 159 (8), 143 (2), 129 (12), 115 (10), 103 (2), 91 (4), 77 (2), 55 (2). HRMS: calculated for [C<sub>17</sub>H<sub>23</sub>N<sub>2</sub>O<sub>6</sub>]<sup>+</sup>: 351.1556 [(M + H)<sup>+</sup>]; found: 351.1540. [α]<sub>D</sub><sup>20</sup>: -72.7 (*c* = 0.61, CH<sub>2</sub>Cl<sub>2</sub>).

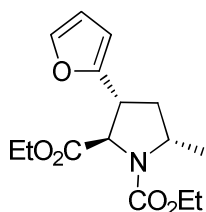

**(2R,3S,5S)-Diethyl 3-(furan-2-yl)-5-methylpyrrolidine-1,2-dicarboxylate, (5m).**

The pyrrolidine **5m** (29 mg, 0.10 mmol, 78%, dr: 9:1) was obtained after 1 hour as a colourless oil, after isolation by flash column chromatography (hexanes/EtOAc gradient from 9.5:0.5 to 7:3) according to the general procedure starting from pyrrolidine **4m** (37 mg, 0.13 mmol), methyllithium (0.10 mL of a 1.31 M solution in diethyl ether, 0.13 mmol) and THF (1.3 mL). <sup>1</sup>H-NMR (CDCl<sub>3</sub>, 300 MHz) (rotamer ratio 1.3:1, \*denotes minor rotamer signals), δ 7.36-7.31 (m, 1H), 6.36-6.25 (m, 1H), 6.20-6.12 (m, 1H), 4.60\* (d, *J* = 4.4 Hz, 1H), 4.53 (d, *J* = 4.7 Hz, 1H), 4.26-4.00 (m, 5H), 3.53-3.40 (m, 1H), 2.60-2.40 (m, 1H), 2.04-1.87 (m, 1H), 1.32-1.12 (m, 9H). <sup>13</sup>C-NMR (CDCl<sub>3</sub>, 75 MHz) (\*denotes minor rotamer signals), δ 172.2, 171.9\*, 155.4\*, 154.4, 154.2\*, 154.1, 141.8, 110.3, 105.7, 105.6\*, 64.5, 61.4\*, 61.3, 61.2, 61.0\*, 54.6, 53.7\*, 41.5, 40.6\*, 37.3\*, 36.9, 21.4\*, 20.4, 14.6\*, 14.5, 14.2, 14.1\*. FTIR (ATR, cm<sup>-1</sup>): 1735 (C=O st), 1703 (NC=O st). MS (70 eV) *m/z* (%): 295 (16), 250 (1), 222 (M<sup>+</sup> - CO<sub>2</sub>Et, 100), 206 (4), 194 (9), 178 (12), 162 (1), 150 (32), 134 (4), 122 (7), 107 (12), 94 (5), 79 (8), 68 (2), 55 (3). HRMS: calculated for [C<sub>15</sub>H<sub>22</sub>NO<sub>5</sub>]<sup>+</sup>: 296.1498 [(M + H)<sup>+</sup>]; found: 296.1489. [α]<sub>D</sub><sup>20</sup>: -47.3 (*c* = 1.01, CH<sub>2</sub>Cl<sub>2</sub>).

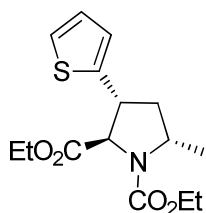

**(2R,3S,5S)-Diethyl 5-methyl-3-(thiophen-2-yl)pyrrolidine-1,2-dicarboxylate, (5n).**

The pyrrolidine **5n** (52 mg, 0.17 mmol, 84%, dr: 13:1) was obtained after 1 hour as a

<sup>2</sup> Calculated yield over a conversion of 40%.

colourless oil, after isolation by flash column chromatography (hexanes/EtOAc gradient from 9.5:0.5 to 7:3) according to the general procedure starting from pyrrolidine **4n** (62 mg, 0.20 mmol), methyllithium (0.14 mL of a 1.48 M solution in diethyl ether, 0.20 mmol) and THF (2.0 mL). <sup>1</sup>H-NMR (CDCl<sub>3</sub>, 300 MHz) (rotamer ratio 1.4:1, \*denotes minor rotamer signals), δ 7.22-7.16 (m, 1H), 6.96-6.90 (m, 2H), 4.50\* (d, *J* = 6.1 Hz, 1H), 4.43 (d, *J* = 6.3 Hz, 1H), 4.26-3.99 (m, 5H), 3.69-3.62 (m, 1H), 2.71-2.52 (m, 1H), 1.98-1.79 (m, 1H), 1.42-1.13 (m, 9H). <sup>13</sup>C-NMR (CDCl<sub>3</sub>, 75 MHz) (\*denotes minor rotamer signals), δ 172.1, 171.8\*, 155.2\*, 154.3, 144.3, 126.9, 124.3, 124.2\*, 124.0, 67.3, 67.2\*, 61.4\*, 61.2, 61.1, 61.0\*, 54.9, 54.0\*, 43.3, 42.6\*, 42.1\*, 41.7, 21.4\*, 20.3, 14.6\*, 14.5, 14.2, 14.1\*. FTIR (ATR, cm<sup>-1</sup>): 1742 (C=O st), 1705 (NC=O st). MS (70 eV) *m/z* (%): 311 (6), 238 (M<sup>+</sup> - CO<sub>2</sub>Et, 100), 222 (4), 210 (5), 194 (5), 182 (1), 166 (15), 150 (3), 137 (3), 123 (12), 110 (3), 97 (7), 79 (2), 65 (1), 53 (1). HRMS: calculated for [C<sub>15</sub>H<sub>22</sub>NO<sub>4</sub>S]<sup>+</sup>: 312.1270 [(M + H)<sup>+</sup>]; found: 312.1255. [α]<sub>D</sub><sup>20</sup>: -51.1 (c = 1.01, CH<sub>2</sub>Cl<sub>2</sub>).

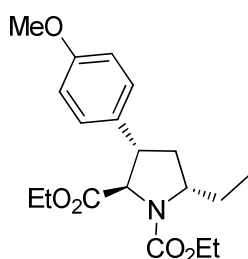

**(2R,3S,5S)-Diethyl 5-ethyl-3-(4-methoxyphenyl)pyrrolidine-1,2-dicarboxylate, (5o).**

The pyrrolidine **5o** (49 mg, 0.14 mmol, 89%, dr: 6:1) was obtained after 1 hour as a colourless oil, after isolation by flash column chromatography (hexanes/EtOAc gradient from 9.5:0.5 to 7:3) according to the general procedure starting from pyrrolidine **4o** (55 mg, 0.16 mmol), methyllithium (0.10 mL of a 1.53 M solution in diethyl ether, 0.16 mmol) and THF (1.6 mL), quenching the reaction with the dropwise addition of <sup>t</sup>BuOH (0.06 mL) in THF (1 mL) at -78°C. <sup>1</sup>H-NMR (CDCl<sub>3</sub>, 300 MHz) (rotamer ratio 1.3:1, \*denotes minor rotamer signals), δ 7.17 (d, *J* = 8.6 Hz, 2H), 6.86 (d, *J* = 8.5 Hz, 2H), 4.38\* (d, *J* = 7.1 Hz, 1H), 4.33 (d, *J* = 7.1 Hz, 1H), 4.26-4.02 (m, 4H), 4.00-3.87 (m, 1H), 3.80 (s, 3H), 3.42-3.26 (m, 1H), 2.54-2.37 (m, 1H), 2.33-2.17 (m, 1H), 2.07-1.93\* (m, 1H), 1.93-1.74 (m, 1H), 1.52-1.36 (m, 1H), 1.32-1.12 (m, 6H), 0.90-0.78 (m, 3H). <sup>13</sup>C-NMR (CDCl<sub>3</sub>, 75 MHz) (\*denotes minor rotamer signals), δ 172.5, 172.1\*, 158.7, 155.3\*, 154.4, 132.5, 132.3\*, 128.1, 114.0, 67.1, 66.9\*, 61.3\*, 61.0, 60.9, 60.5, 59.6\*, 55.3, 47.3, 46.5\*, 38.6\*, 38.3, 27.1\*, 26.1, 14.6\*, 14.4, 14.2, 14.1\*, 9.8, 9.6\*. FTIR (ATR, cm<sup>-1</sup>): 1742 (C=O st), 1706 (NC=O st). MS (70 eV) *m/z* (%): 349 (3), 320 (4), 276 (M<sup>+</sup> - CO<sub>2</sub>Et, 100), 248 (7), 232 (3), 218 (1), 204 (11), 187 (1), 174 (11), 160 (2), 147 (13), 130 (12), 115 (3), 91 (5), 77 (2), 58 (1). HRMS: calculated for [C<sub>19</sub>H<sub>28</sub>NO<sub>5</sub>]<sup>+</sup>: 350.1967 [(M + H)<sup>+</sup>]; found: 350.1949. [α]<sub>D</sub><sup>20</sup>: -52.2 (c = 1.00, CH<sub>2</sub>Cl<sub>2</sub>).

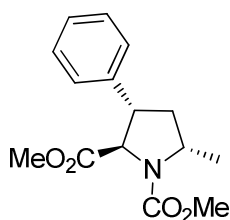

**(2R,3S,5S)-Dimethyl 5-methyl-3-phenylpyrrolidine-1,2-dicarboxylate, (5r).**

The pyrrolidine **5r** (61 mg, 0.22 mmol, 80%, dr: 10:1) was obtained after 1 hour as a

colourless oil, after isolation by flash column chromatography (hexanes/EtOAc gradient from 9.5:0.5 to 7:3) according to the general procedure starting from pyrrolidine **4r** (76 mg, 0.27 mmol), methyl lithium (0.19 mL of a 1.48 M solution in diethyl ether, 0.27 mmol) and THF (2.7 mL). <sup>1</sup>H-NMR (CDCl<sub>3</sub>, 300 MHz) (rotamer ratio 1.2:1, \*denotes minor rotamer signals), δ 7.37-7.19 (m, 5H), 4.54\* (d, *J* = 6.4 Hz, 1H), 4.47 (d, *J* = 6.4 Hz, 1H), 4.22-4.00 (m, 1H), 3.79-3.60 (m, 6H), 3.50-3.33 (m, 1H), 2.66-2.44 (m, 1H), 1.93-1.75 (m, 1H), 1.37 (d, *J* = 6.0 Hz, 3H), 1.26\* (d, *J* = 6.1 Hz, 3H). <sup>13</sup>C-NMR (CDCl<sub>3</sub>, 75 MHz) (\*denotes minor rotamer signals), δ 173.0, 172.7\*, 155.8\*, 154.8, 140.6, 140.4\*, 128.7, 127.2, 127.0, 66.5, 66.4\*, 55.2, 54.2\*, 52.6, 52.2, 47.8, 47.0\*, 41.7\*, 41.3, 21.4\*, 20.3. FTIR (ATR, cm<sup>-1</sup>): 1747 (C=O st), 1699 (NC=O st). MS (70 eV) *m/z* (%): 277 (1), 262 (1), 218 (M<sup>+</sup> - CO<sub>2</sub>Et, 100), 202 (10), 186 (3), 170 (1), 158 (5), 143 (18), 128 (8), 117 (27), 103 (4), 91 (15), 77 (4), 59 (11). HRMS: calculated for [C<sub>15</sub>H<sub>20</sub>NO<sub>4</sub>]<sup>+</sup>: 278.1392 [(M + H)<sup>+</sup>]; found: 278.1381. [α]<sub>D</sub><sup>20</sup>: -58.9 (*c* = 1.19, CH<sub>2</sub>Cl<sub>2</sub>).

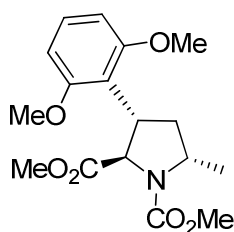

**(2R,3S,5S)-Dimethyl 3-(2,6-dimethoxyphenyl)-5-methylpyrrolidine-1,2-dicarboxylate, (5s).**

The pyrrolidine **5s** (10 mg, 0.03 mmol, 75%, dr: 3:1) was obtained after 1 hour as a colourless oil, after isolation by flash column chromatography (hexanes/EtOAc gradient from 9.5:0.5 to 7:3) according to the general procedure starting from pyrrolidine **4s** (14 mg, 0.04 mmol), methyl lithium (0.03 mL of a 1.53 M solution in diethyl ether, 0.04 mmol) and THF (0.4 mL). <sup>1</sup>H-NMR (CDCl<sub>3</sub>, 300 MHz) (rotamer ratio 1.4:1, \*denotes minor rotamer signals), δ 7.17 (t, *J* = 8.3 Hz, 1H), 6.51 (d, *J* = 8.3 Hz, 2H), 4.60\* (d, *J* = 8.4 Hz, 1H), 4.48 (d, *J* = 8.5 Hz, 1H), 4.11-4.02 (m, 1H), 4.01-3.84 (m, 1H), 3.80-3.63 (m, 9H), 3.46 (s, 3H), 2.92-2.70 (m, 1H), 2.17-1.98 (m, 1H), 1.55-1.49 (m, 3H). <sup>13</sup>C-NMR (CDCl<sub>3</sub>, 75 MHz) (\*denotes minor rotamer signals), δ 171.8, 159.5, 156.0\*, 155.1, 128.4, 112.5\*, 112.4, 103.8, 62.8\*, 62.4, 55.5, 54.7, 54.0\*, 52.3\*, 52.2, 51.3, 38.0, 37.5\*, 35.7\*, 34.9, 21.2\*, 20.1. FTIR (ATR, cm<sup>-1</sup>): 1746 (C=O st), 1698 (NC=O st). MS (70 eV) *m/z* (%): 337 (2), 305 (1), 278 (M<sup>+</sup> - CO<sub>2</sub>Me, 100), 262 (1), 246 (2), 219 (1), 204 (2), 188 (4), 175 (1), 161 (6), 147 (3), 134 (1), 121 (4), 105 (1), 91 (6), 77 (2), 59 (6). HRMS: calculated for [C<sub>17</sub>H<sub>24</sub>NO<sub>6</sub>]<sup>+</sup>: 338.1604 [(M + H)<sup>+</sup>]; found: 338.1596. [α]<sub>D</sub><sup>20</sup>: 60.7 (*c* = 0.99, CH<sub>2</sub>Cl<sub>2</sub>).

### General procedure for the Synthesis of Prolines (6a-b).

Trimethylsilyl iodide (10 mmol) was added dropwise to a solution of **5a,p** (1 mmol) in dry  $\text{CHCl}_3$  under inert atmosphere. The reaction mixture was refluxed for 24 h, then MeOH was added and the mixture was refluxed for 3 h more and the mixture was allowed to reach room temperature. After this time, the solvent was removed under reduced pressure,  $\text{Et}_2\text{O}$  (5 mL) and a few drops of HCl conc. were added and the solution was stirred for 10-15 min. The mixture was washed with  $\text{Et}_2\text{O}$  (3 x 20 mL). The liquid phase was basified by the addition of  $\text{NH}_3$  (aq.), and the mixture was extracted with  $\text{CH}_2\text{Cl}_2$  (3 x 20 mL). The combined organic layers were dried over anhydrous  $\text{Na}_2\text{SO}_4$ , filtered, and the solvent was removed under reduced pressure, yielding the desired product **6a,b** without further purification.

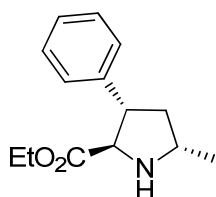

### (2R,3S,5S)-Ethyl 5-methyl-3-phenylpyrrolidine-2-carboxylate, (6a).

The pyrrolidine **6a** (36 mg, 0.15 mmol, 80%) was obtained as a colourless oil according to the general procedure starting from pyrrolidine **5a** (59 mg, 0.19 mmol), trimethylsilyl iodide (0.27 mL, 1.9 mmol) and  $\text{CHCl}_3$  (10.0 mL), followed by the addition of MeOH (5.6 mL).  $^1\text{H-NMR}$  ( $\text{CDCl}_3$ , 300 MHz)  $\delta$  7.33-7.16 (m, 5H), 4.26-4.01 (m, 2H), 3.84 (d,  $J = 7.4$  Hz, 1H), 3.58-3.42 (m, 1H), 3.42-3.28 (m, 1H), 2.47-2.25 (m, 2H), 1.67-1.56 (m, 1H), 1.25 (d,  $J = 6.1$  Hz, 3H), 1.19 (t,  $J = 7.1$  Hz, 3H).  $^{13}\text{C-NMR}$  ( $\text{CDCl}_3$ , 75 MHz)  $\delta$  175.2, 143.0, 128.5, 127.4, 126.6, 67.2, 60.9, 54.6, 50.8, 44.0, 21.2, 14.2. FTIR (ATR,  $\text{cm}^{-1}$ ): 1730 (C=O st). MS (70 eV)  $m/z$  (%): 161 (13), 160 ( $\text{M}^+ - \text{CO}_2\text{Et}$ , 100), 144 (4), 129 (4), 117 (10), 100 (2), 91 (9), 83 (4), 73 (3), 63 (1), 55 (4). HRMS: calculated for  $[\text{C}_{14}\text{H}_{20}\text{NO}_2]^+$ : 234.1494 [(M + H) $^+$ ]; found: 234.1484.  $[\alpha]_{\text{D}}^{20}$ : -60.5 ( $c = 1.00$ ,  $\text{CH}_2\text{Cl}_2$ ).

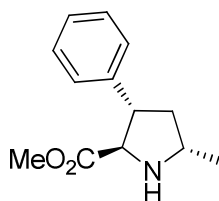

### (2R,3S,5S)-Methyl 5-methyl-3-phenylpyrrolidine-2-carboxylate, (6b).

The pyrrolidine **6b** (33 mg, 0.15 mmol, 70%) was obtained as a colourless oil according to the general procedure starting from pyrrolidine **5p** (61 mg, 0.22 mmol), trimethylsilyl iodide (0.30 mL, 2.2 mmol) and  $\text{CHCl}_3$  (11.0 mL), followed by the addition of MeOH (6.4 mL).  $^1\text{H-NMR}$  ( $\text{CDCl}_3$ , 300 MHz)  $\delta$  7.38-7.21 (m, 5H), 3.88 (d,  $J = 7.3$  Hz, 1H), 3.68 (s, 3H), 3.55-3.44 (m, 1H), 3.43-3.35 (m, 1H), 2.42 (bs, 1H), 2.32 (ddd,  $J = 12.4, 7.4, 5.2$  Hz, 1H), 1.66-1.55 (m, 1H), 1.25 (d,  $J = 6.1$  Hz, 3H).  $^{13}\text{C-NMR}$  ( $\text{CDCl}_3$ , 75 MHz)  $\delta$  175.8, 143.0, 128.6, 127.3, 126.7, 67.1, 54.6, 52.1, 50.6, 44.1, 21.0. FTIR (ATR,  $\text{cm}^{-1}$ ): 1731 (C=O st). MS (70 eV)  $m/z$  (%): 204 (1), 183 (1), 160 ( $\text{M}^+ - \text{CO}_2\text{Me}$ , 100), 144 (5), 128 (5), 115 (21), 103 (3), 91 (15), 83 (12), 72 (4), 65 (3), 55 (11). HRMS: calculated for  $[\text{C}_{13}\text{H}_{18}\text{NO}_2]^+$ : 220.1338 [(M + H) $^+$ ]; found: 220.1323.  $[\alpha]_{\text{D}}^{20}$ : -66.3 ( $c = 1.01$ ,  $\text{CH}_2\text{Cl}_2$ ).

## NMR spectra

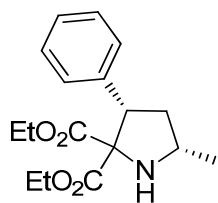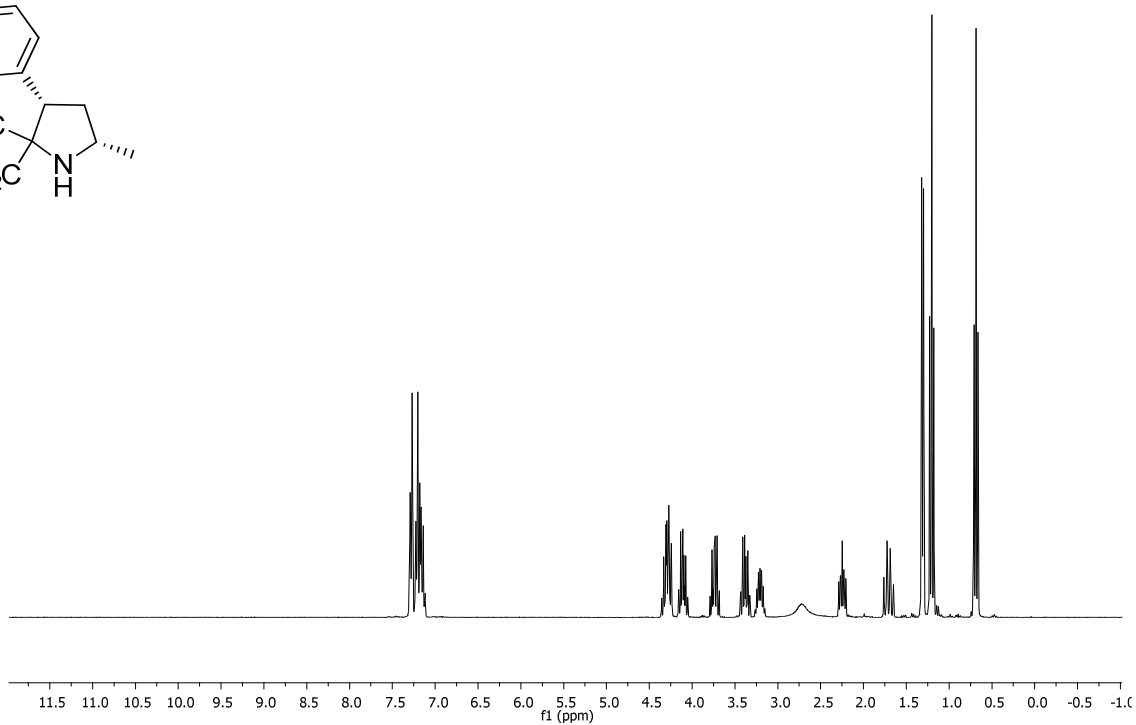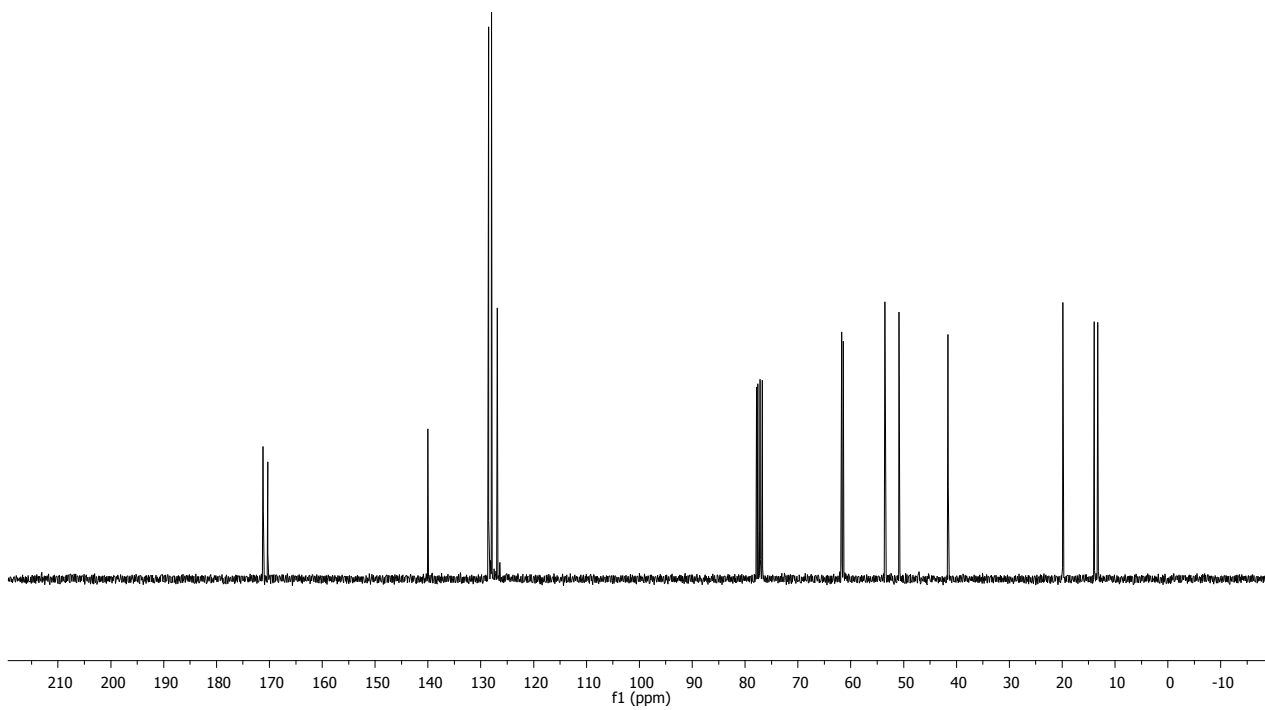

Figure 1:  $^1\text{H-NMR}$  and  $^{13}\text{C-NMR}$  spectra for compound 4a.



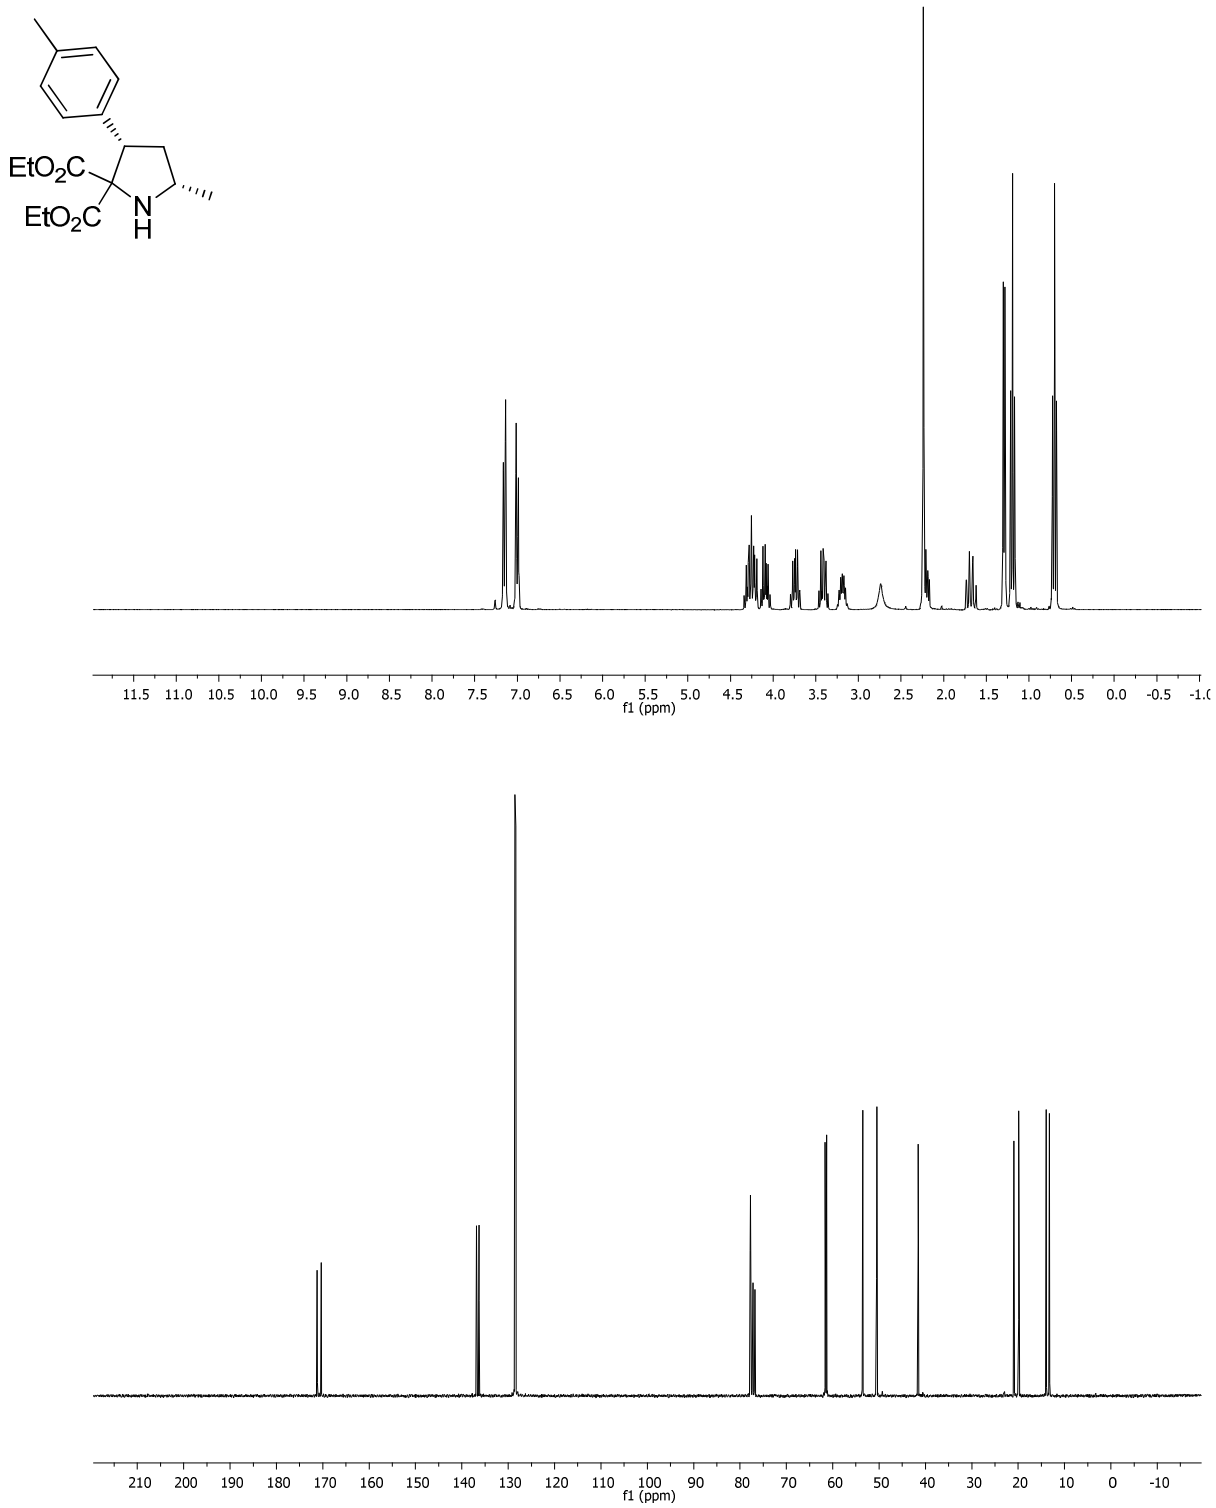

Figure 2:  $^1\text{H-NMR}$  and  $^{13}\text{C-NMR}$  spectra for compound **4b**.

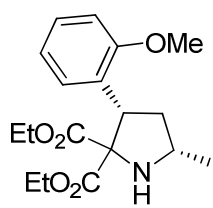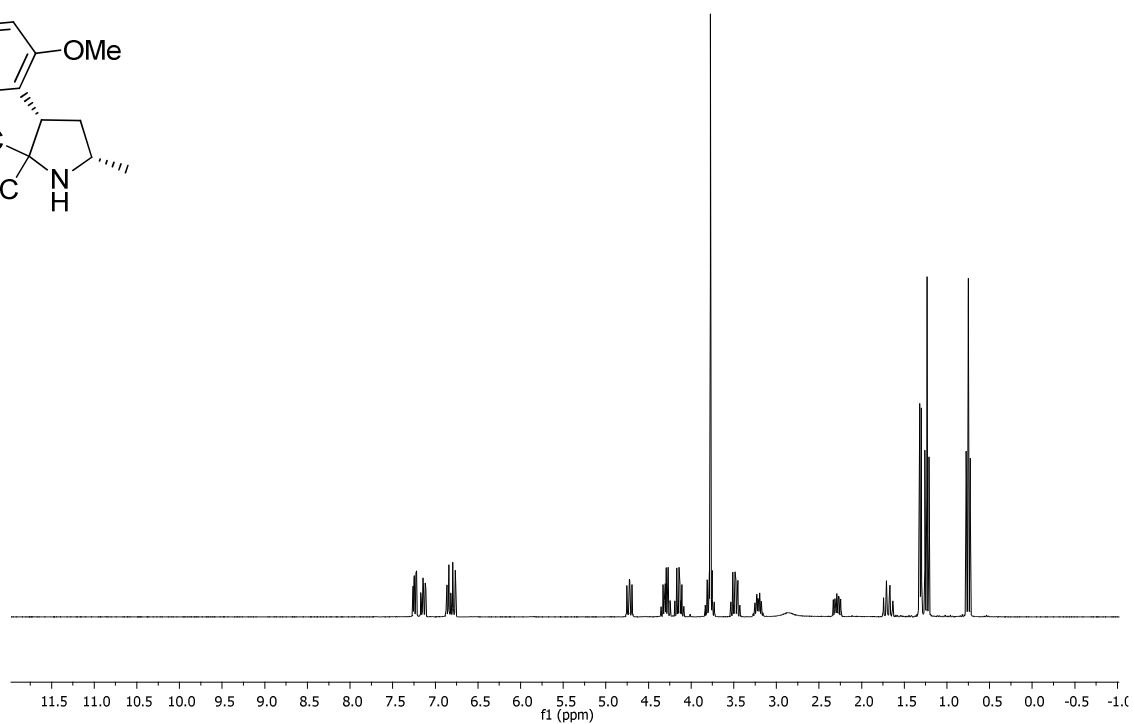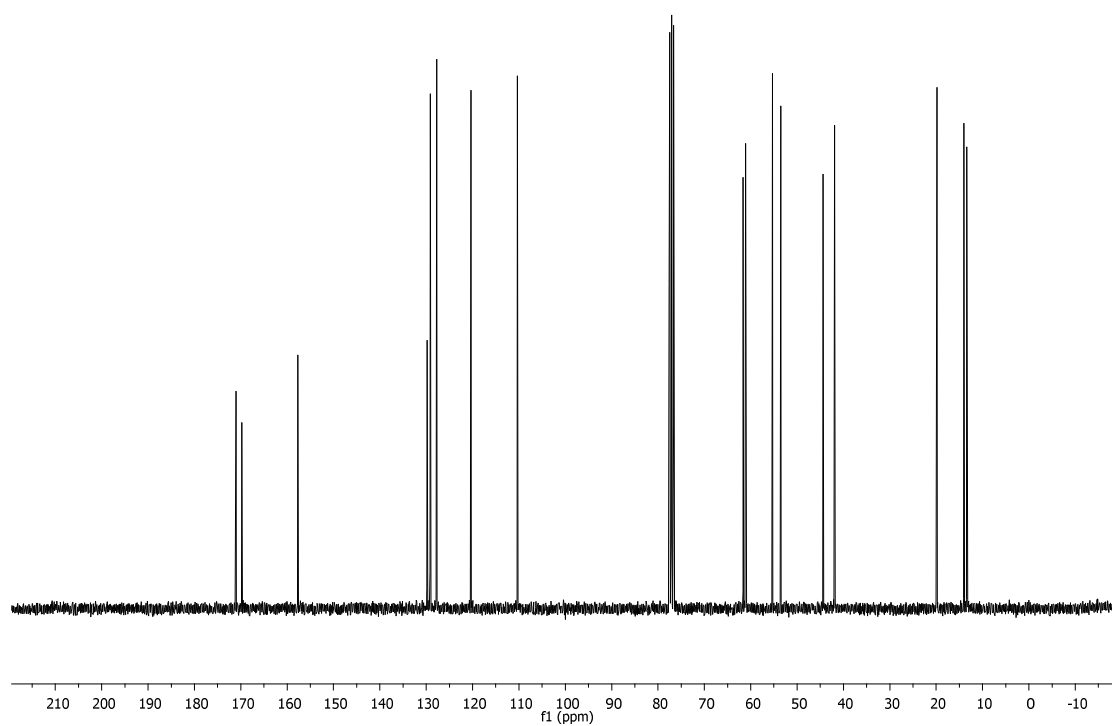

Figure 3:  $^1\text{H-NMR}$  and  $^{13}\text{C-NMR}$  spectra for compound 4c.

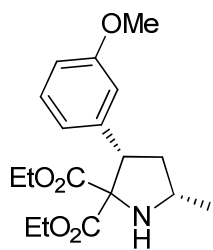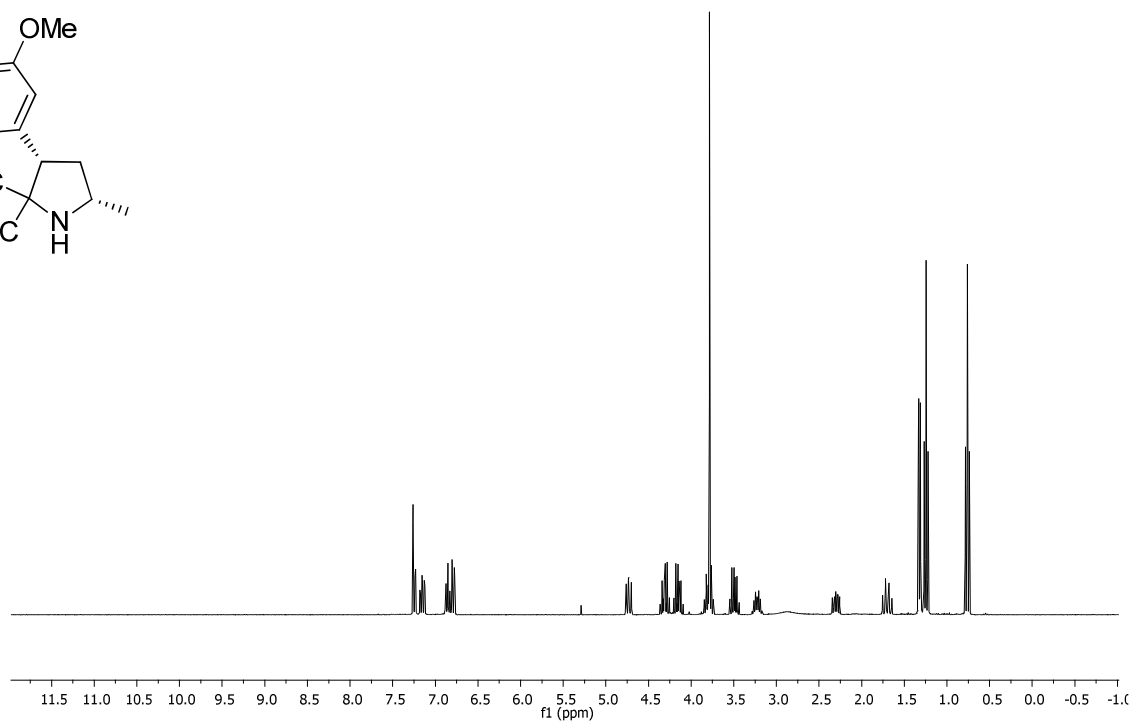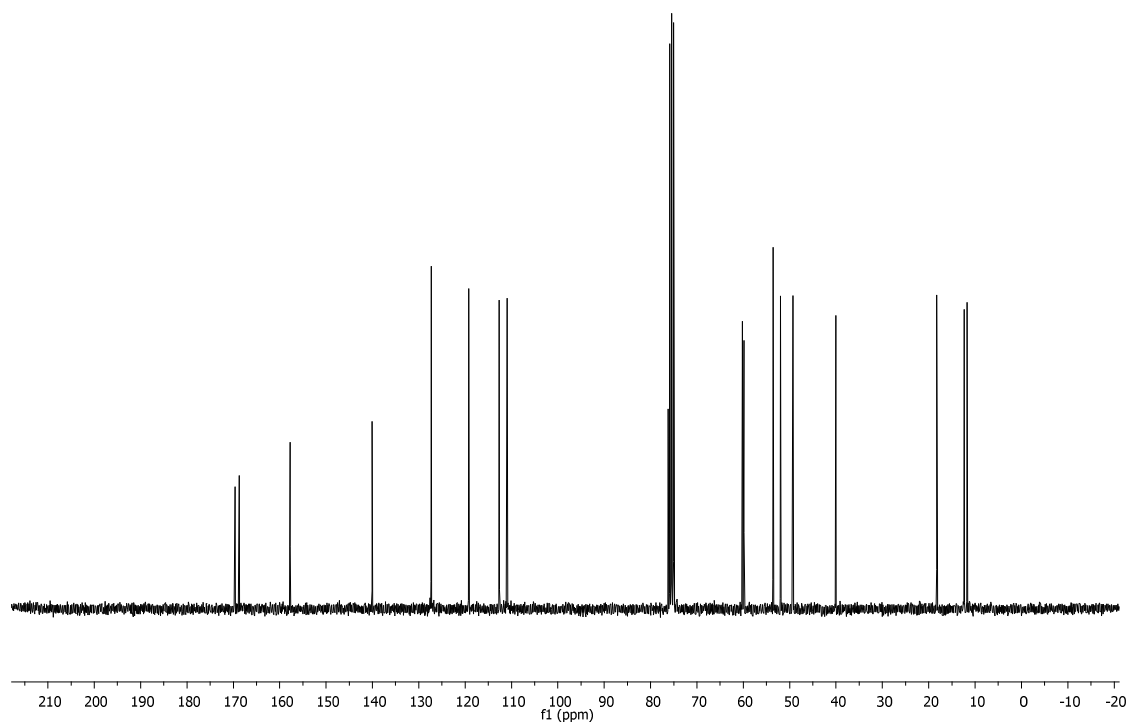

Figure 4: <sup>1</sup>H-NMR and <sup>13</sup>C-NMR spectra for compound 4d.

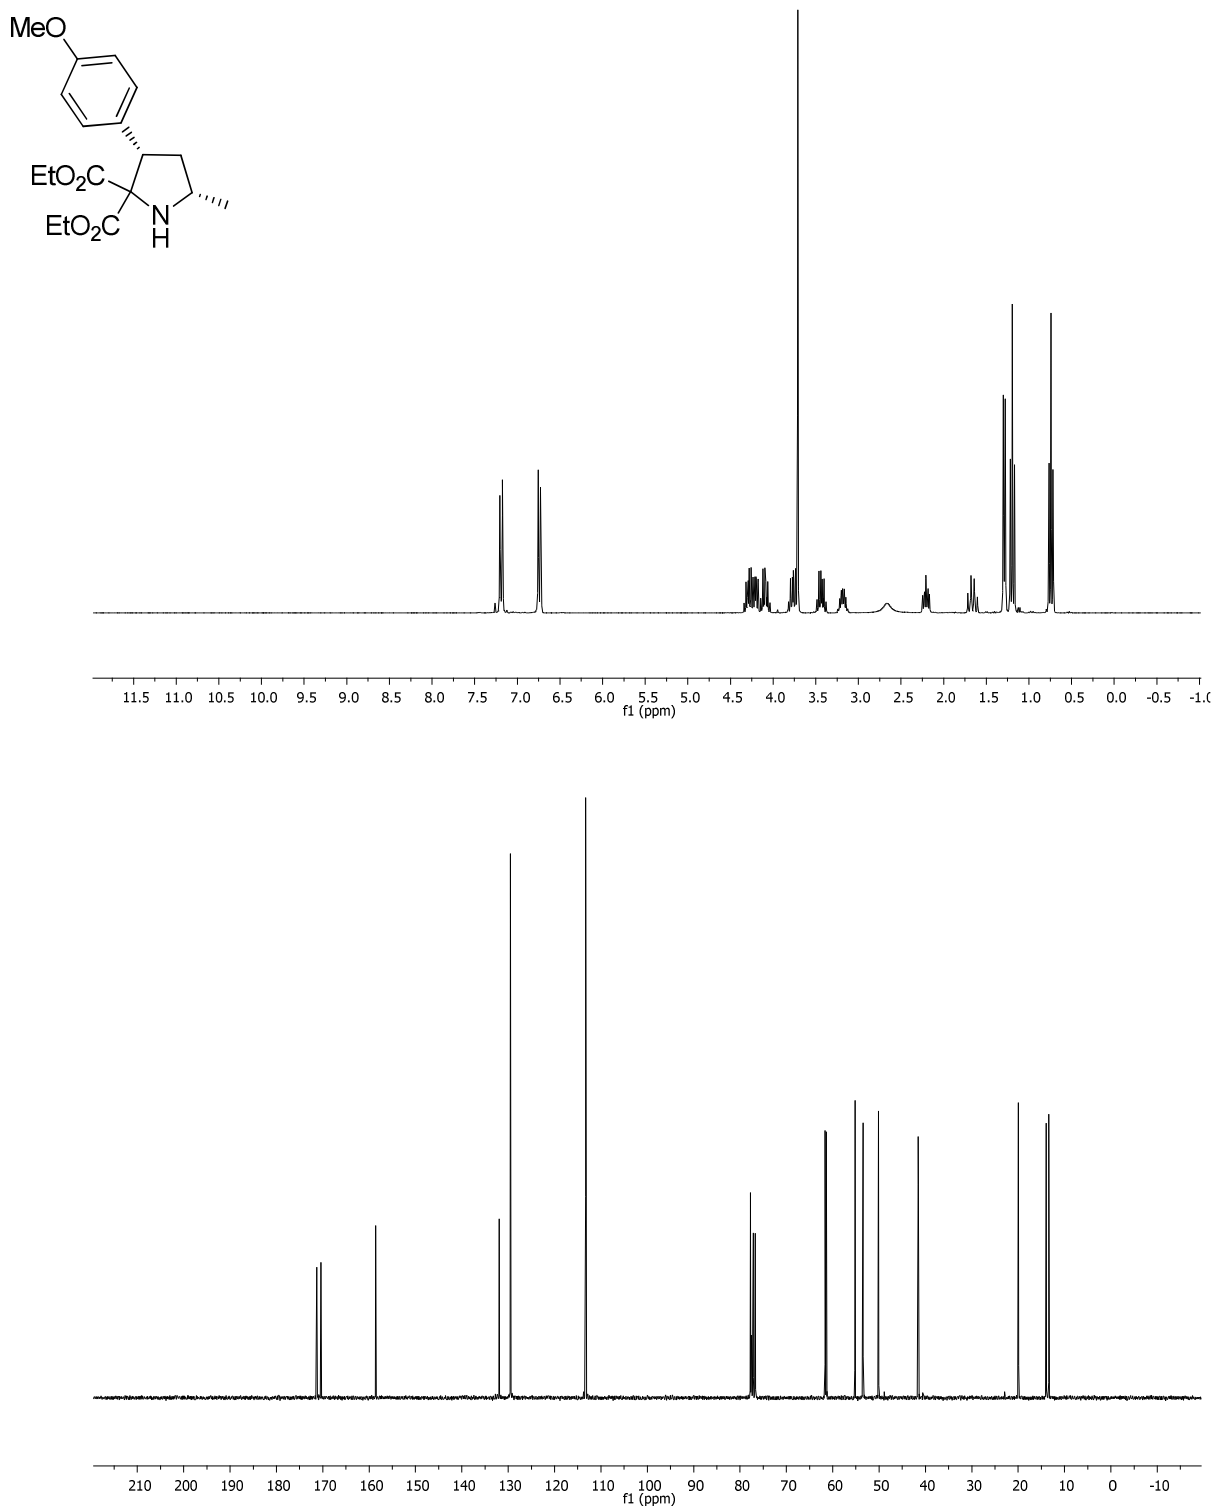

Figure 5:  $^1\text{H-NMR}$  and  $^{13}\text{C-NMR}$  spectra for compound **4e**.

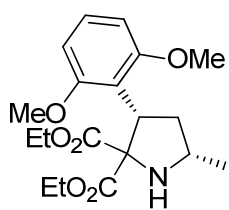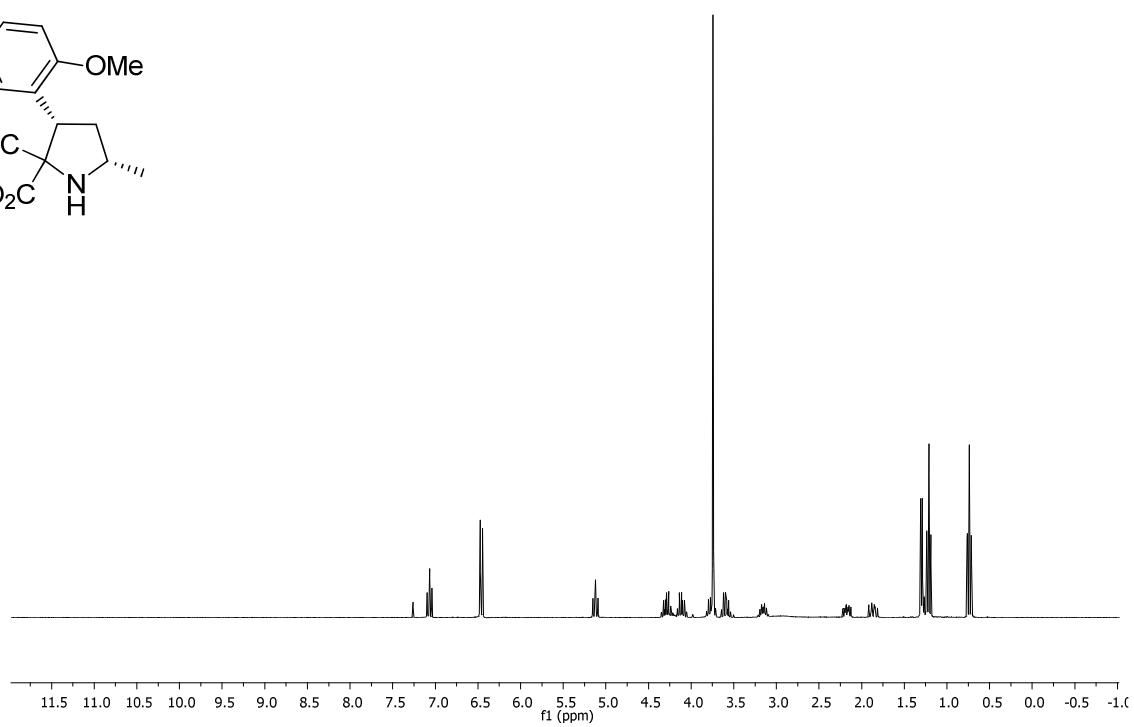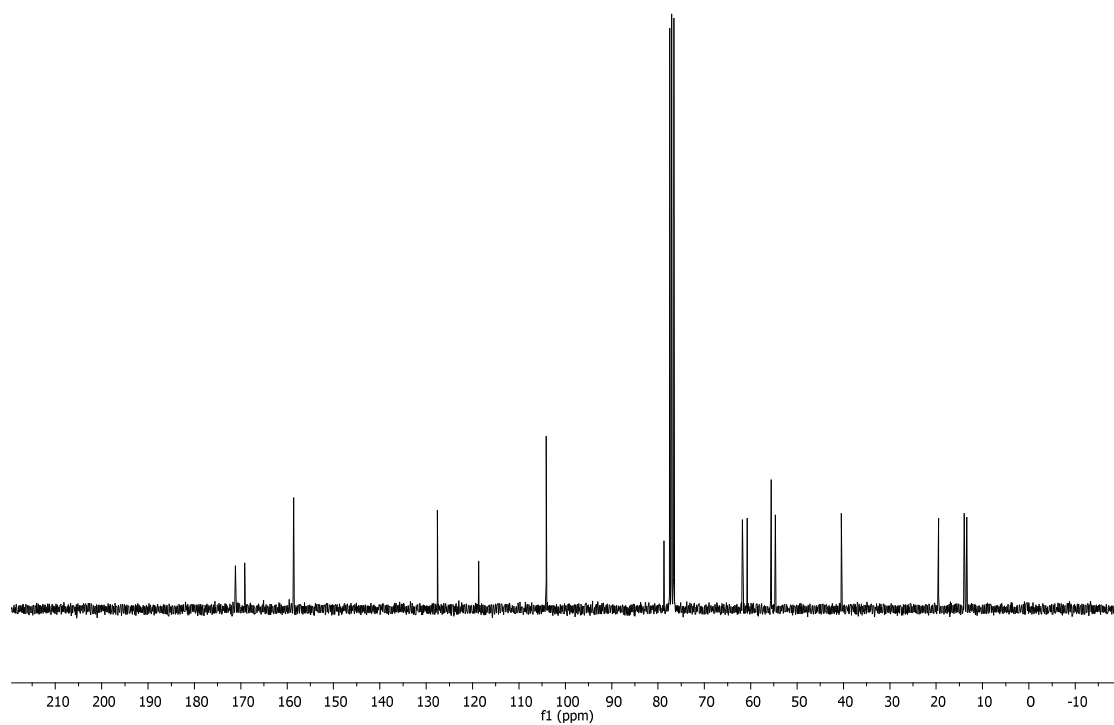

Figure 6: <sup>1</sup>H-NMR and <sup>13</sup>C-NMR spectra for compound 4f.

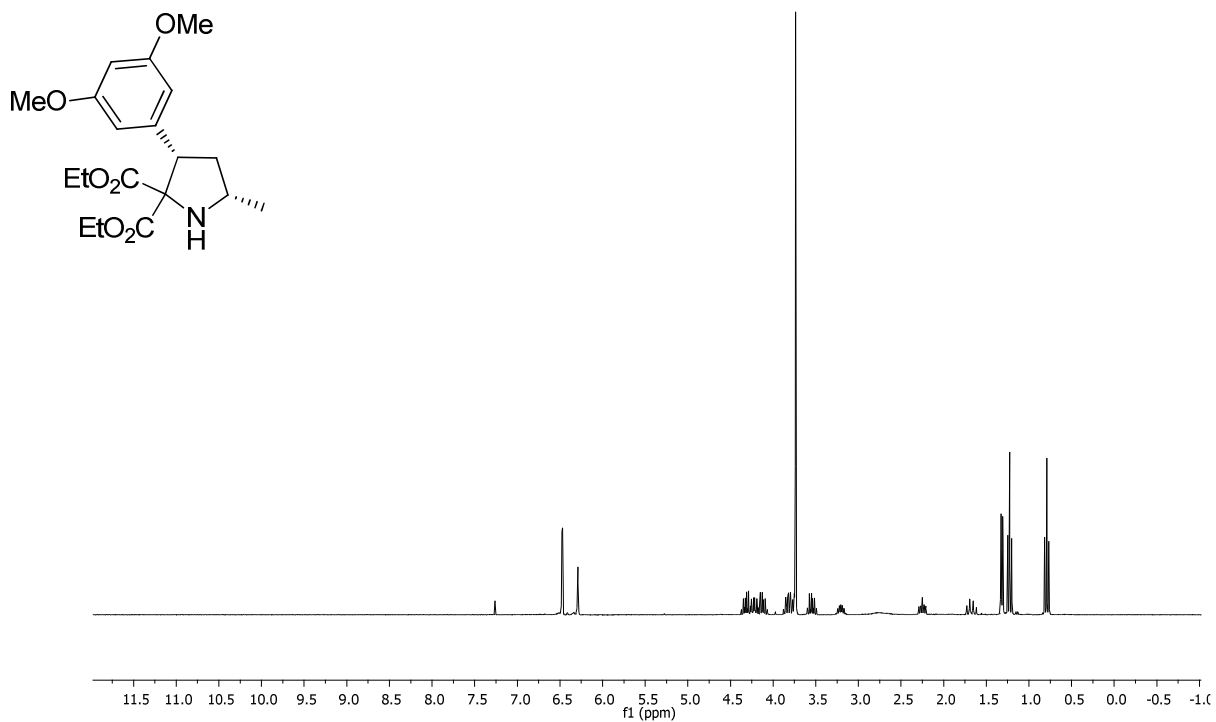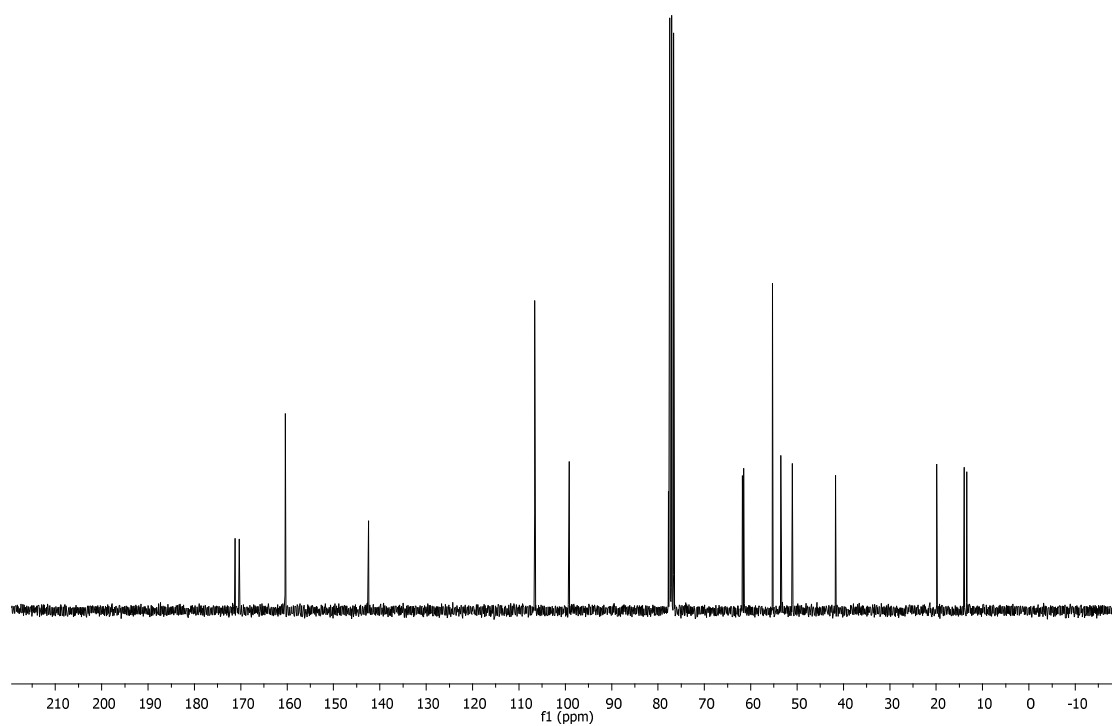

Figure 7: <sup>1</sup>H-NMR and <sup>13</sup>C-NMR spectra for compound **4g**.

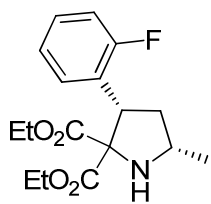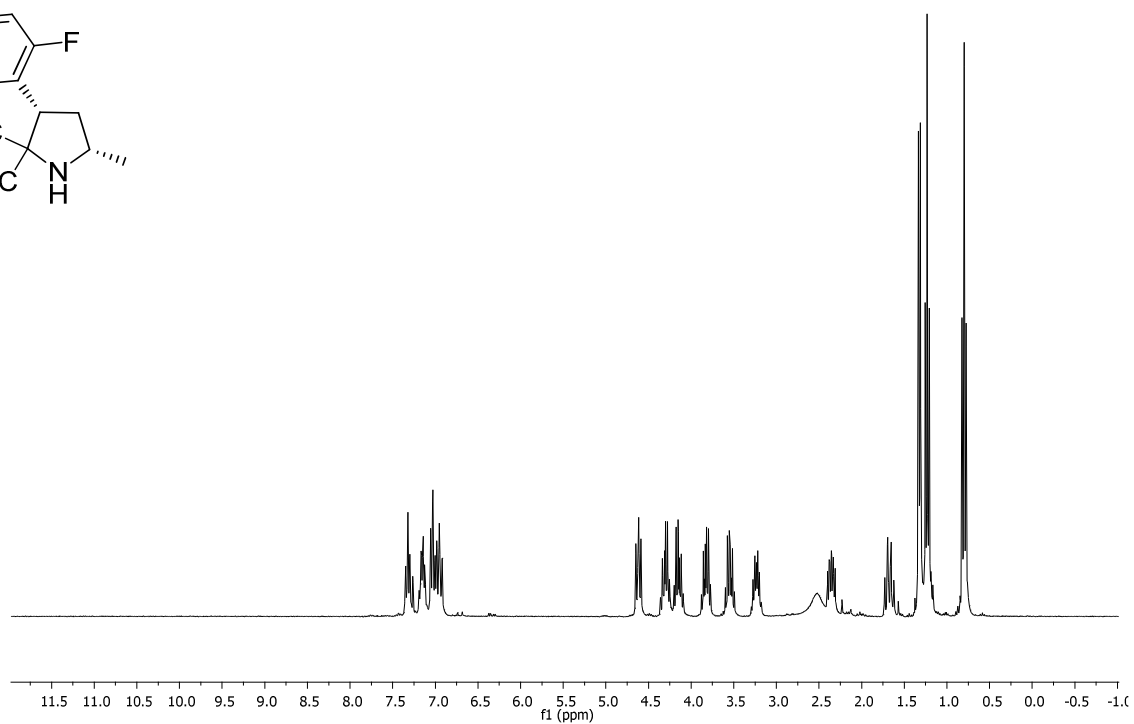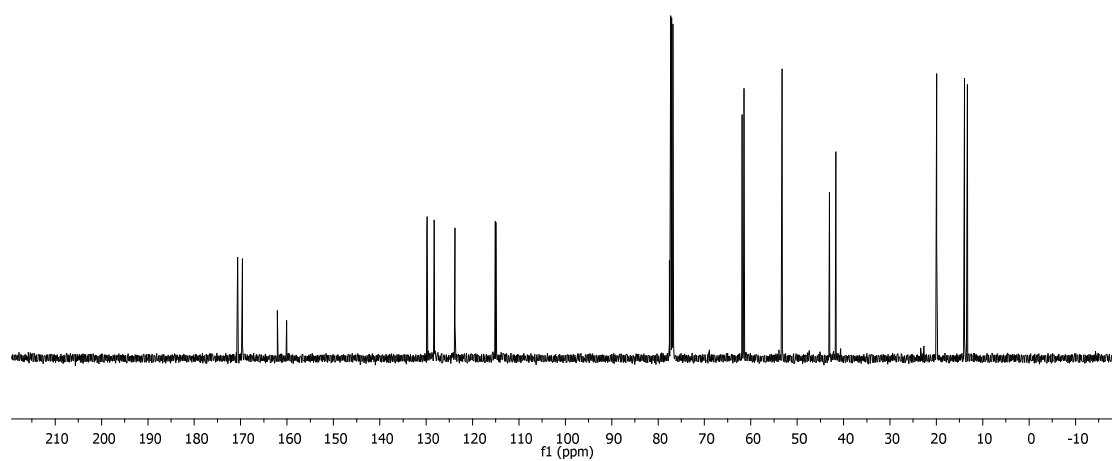

Figure 8:  $^1\text{H-NMR}$  and  $^{13}\text{C-NMR}$  spectra for compound 4h.

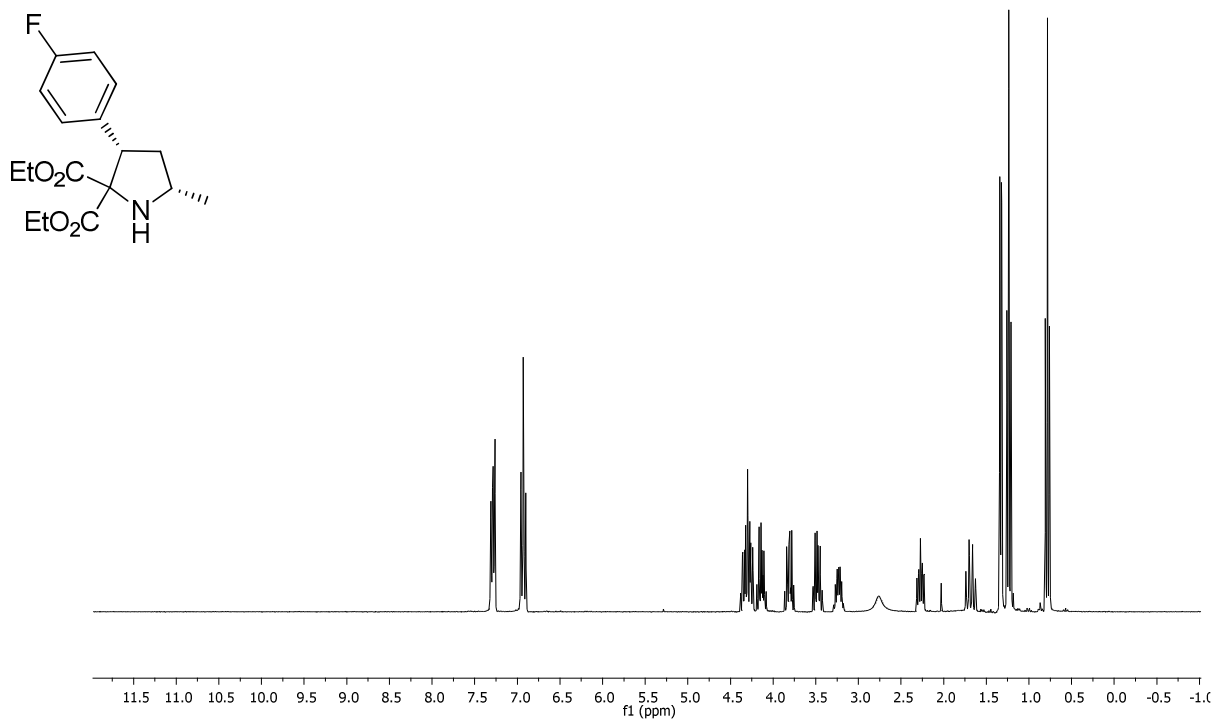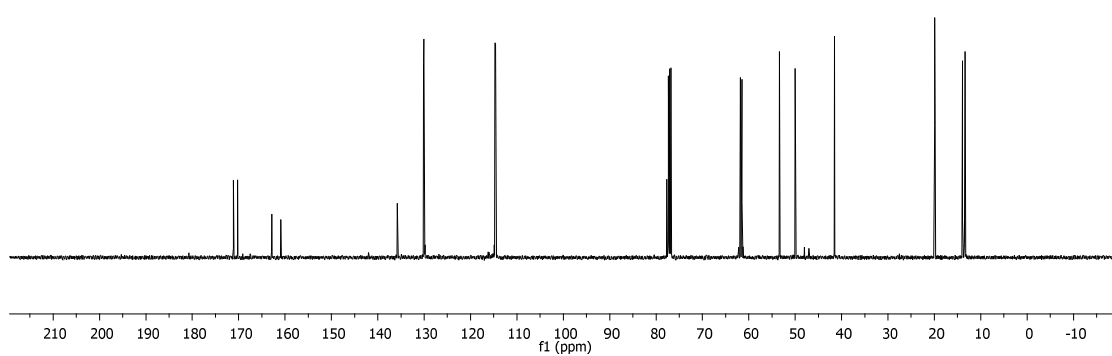

Figure 9:  $^1\text{H-NMR}$  and  $^{13}\text{C-NMR}$  spectra for compound 4i.



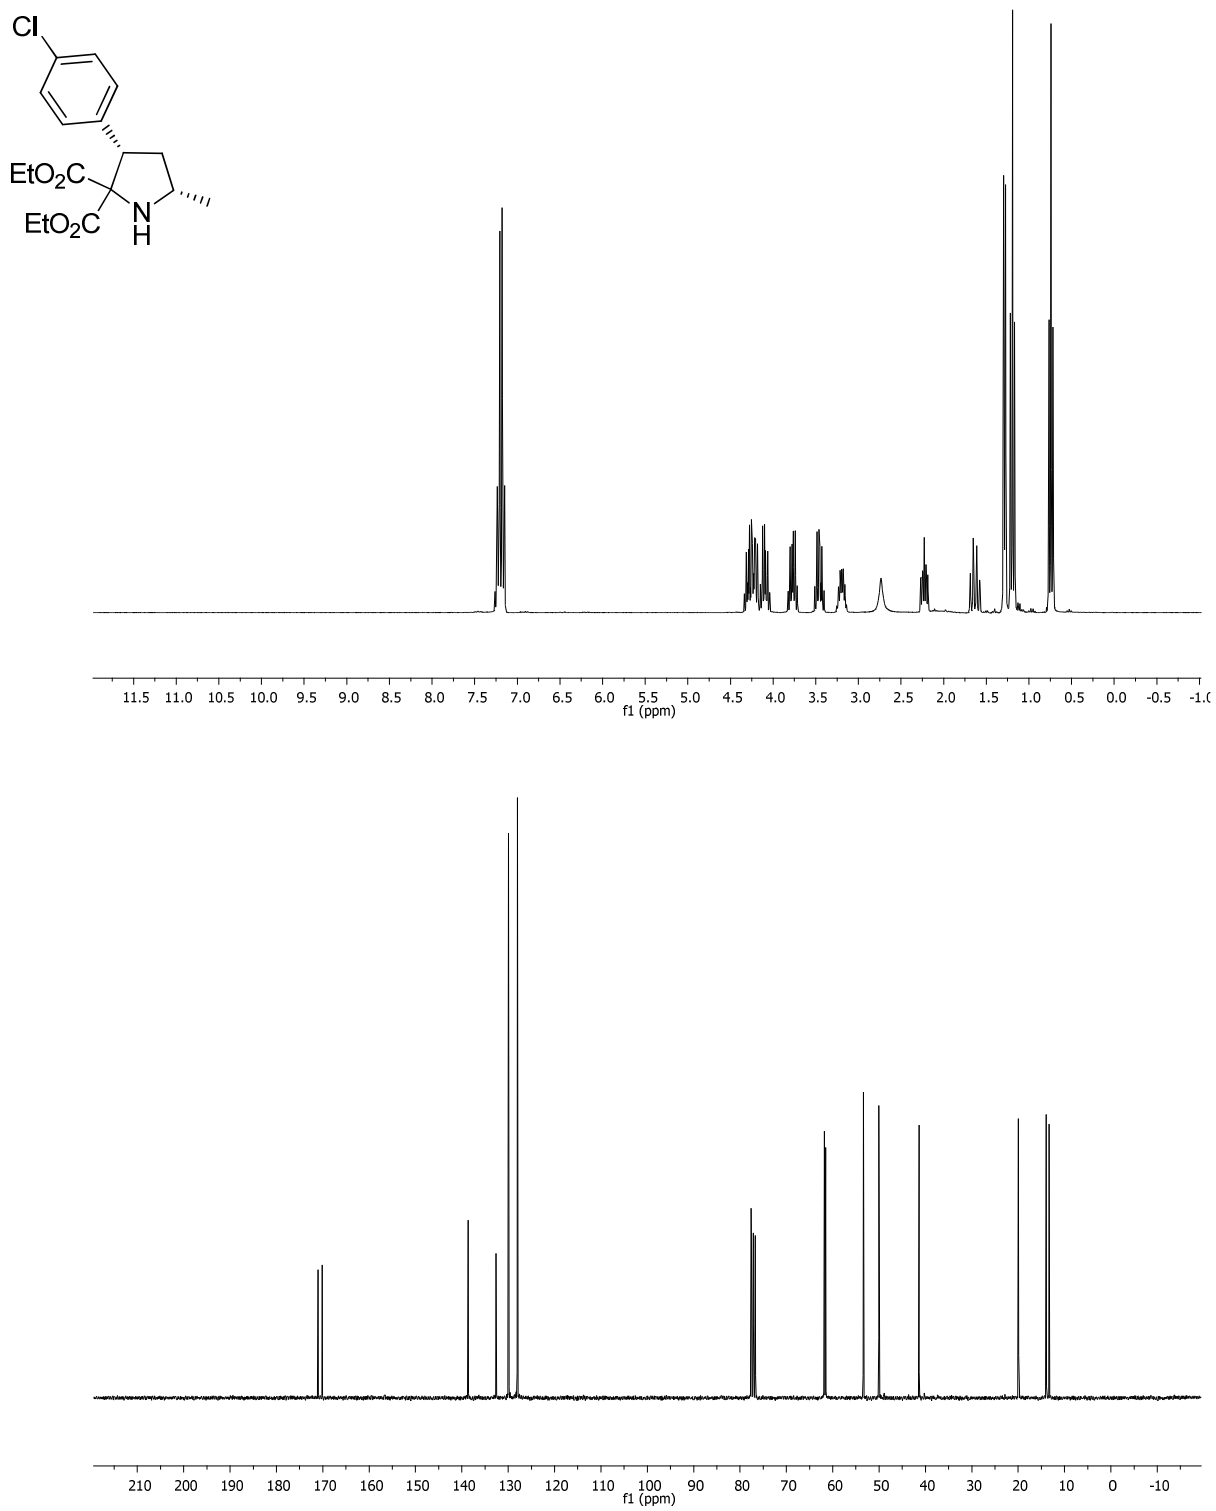

Figure 10:  $^1\text{H-NMR}$  and  $^{13}\text{C-NMR}$  spectra for compound **4j**.

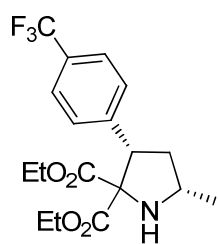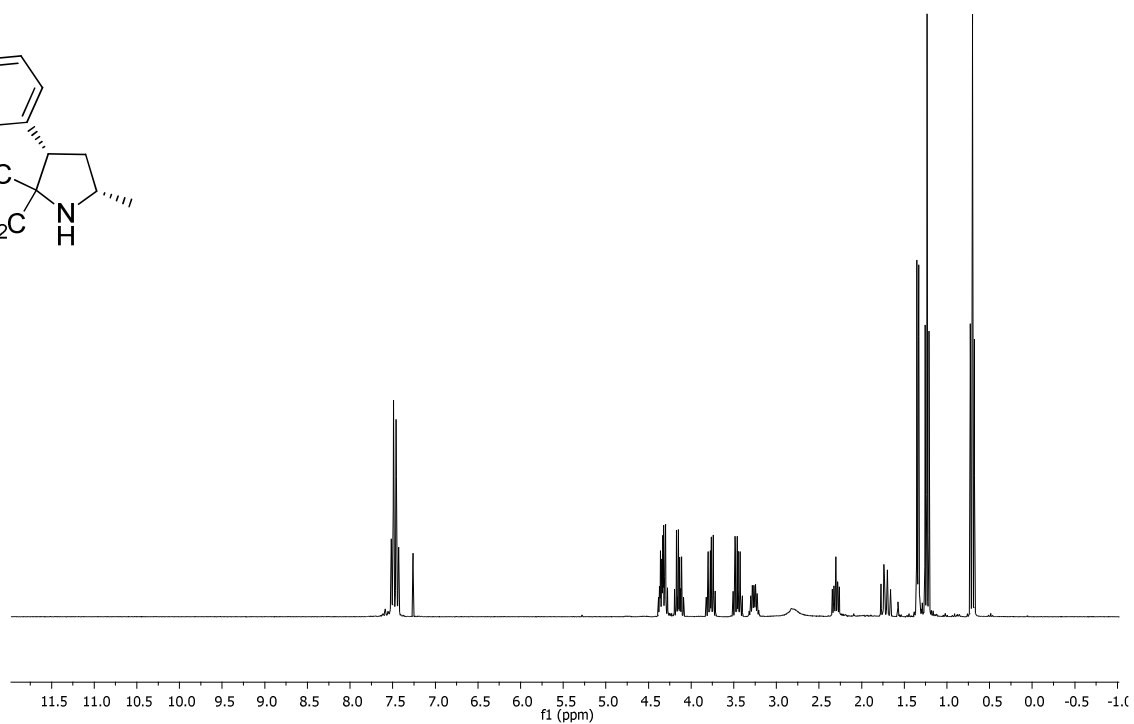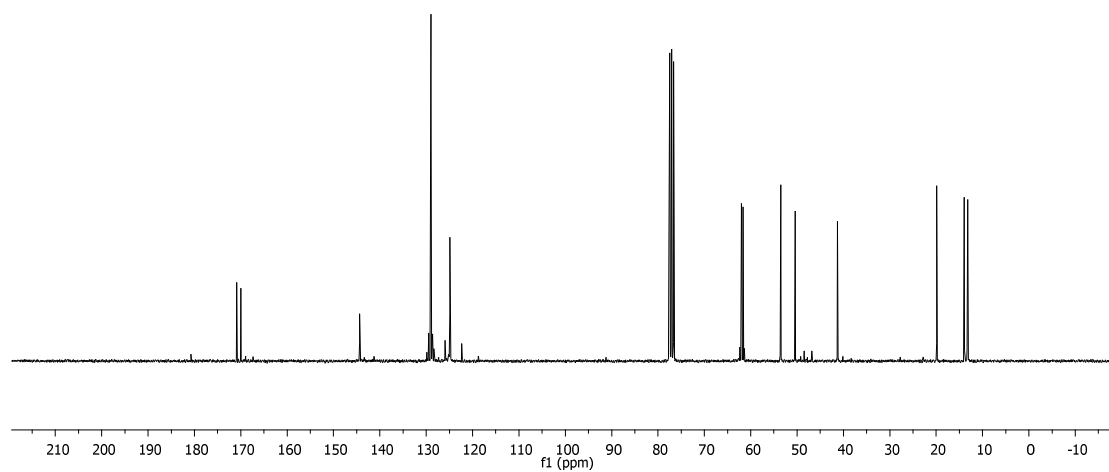

Figure 11:  $^1\text{H-NMR}$  and  $^{13}\text{C-NMR}$  spectra for compound 4k.

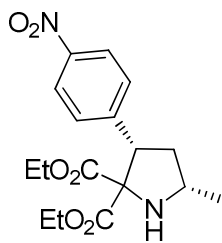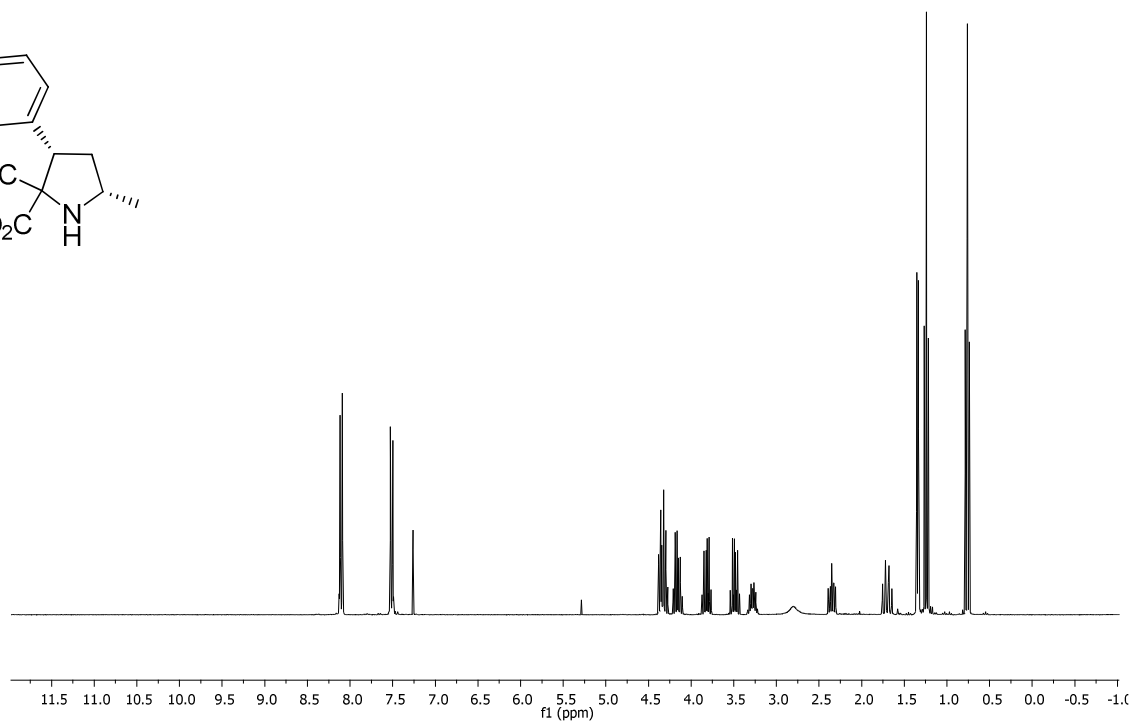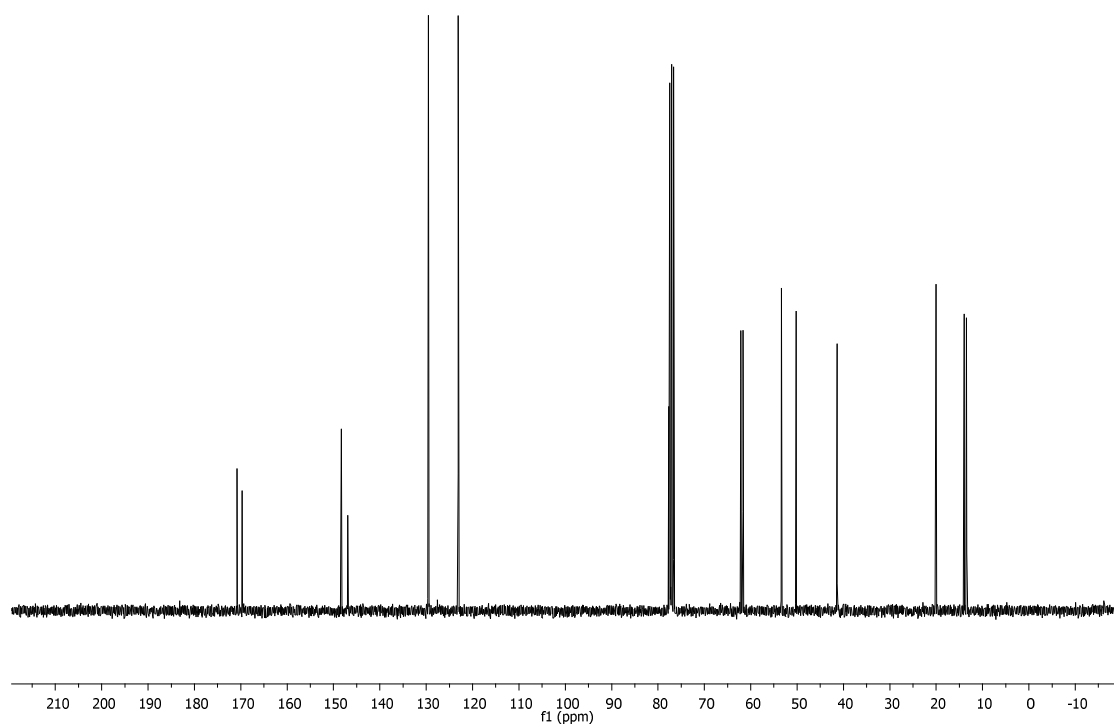

Figure 12: <sup>1</sup>H-NMR and <sup>13</sup>C-NMR spectra for compound 4I.

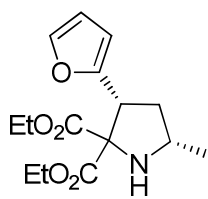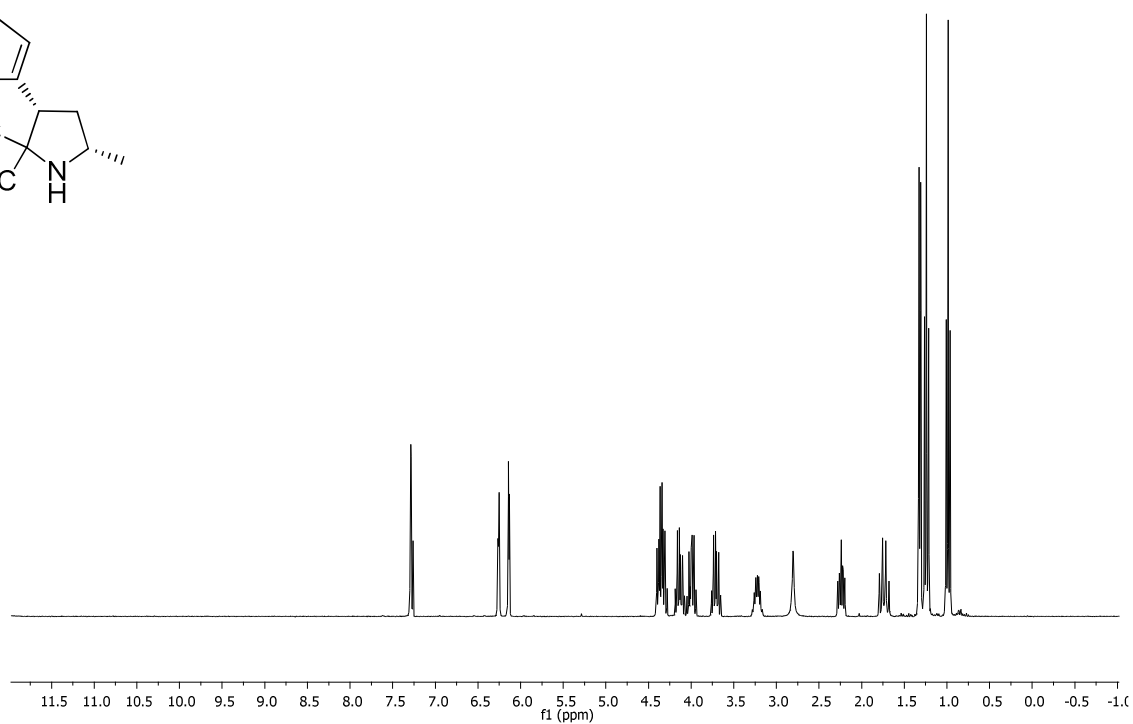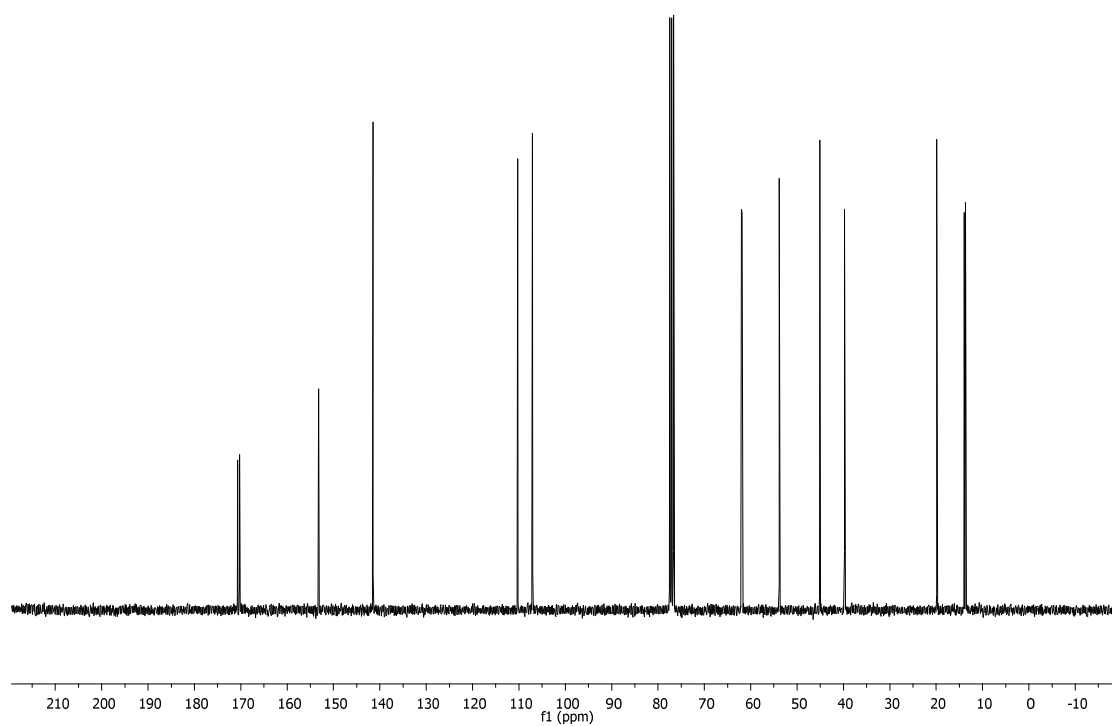

Figure 13: <sup>1</sup>H-NMR and <sup>13</sup>C-NMR spectra for compound 4m.

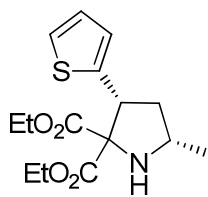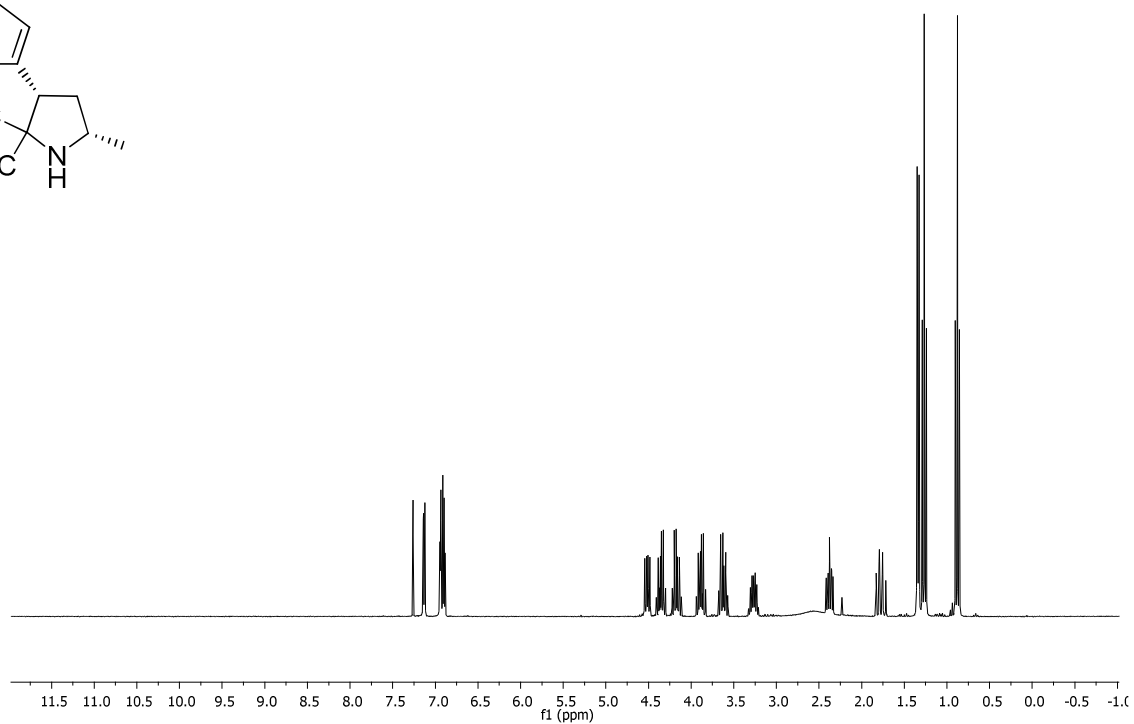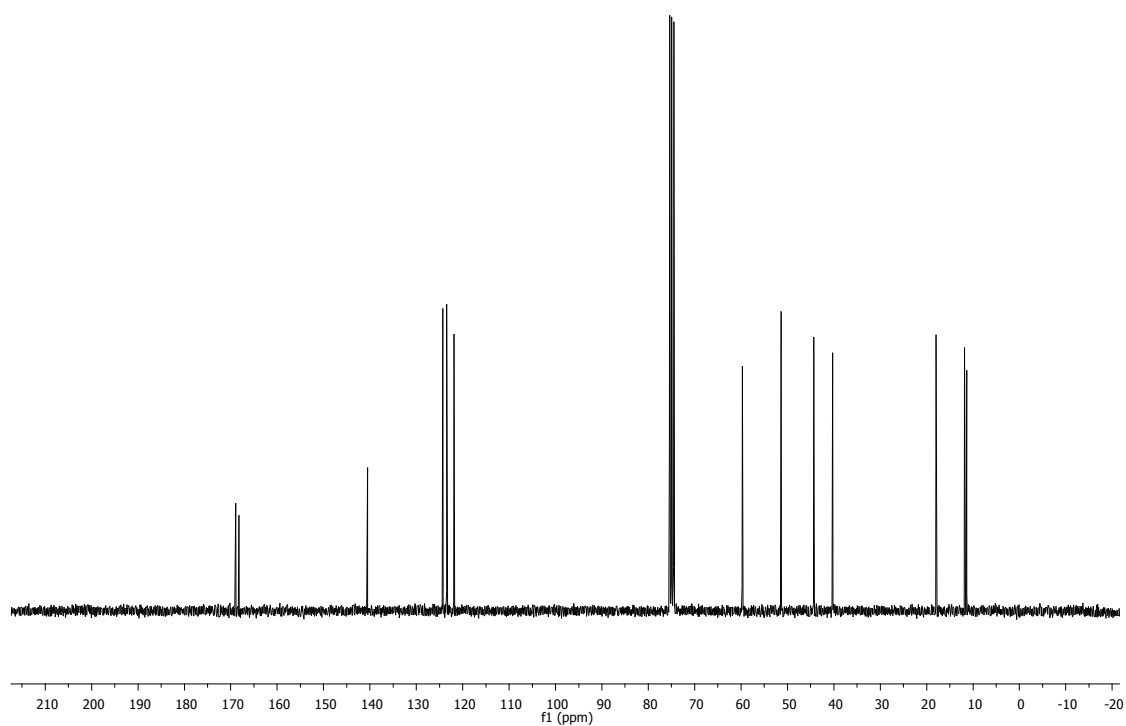

Figure 14: <sup>1</sup>H-NMR and <sup>13</sup>C-NMR spectra for compound 4n.

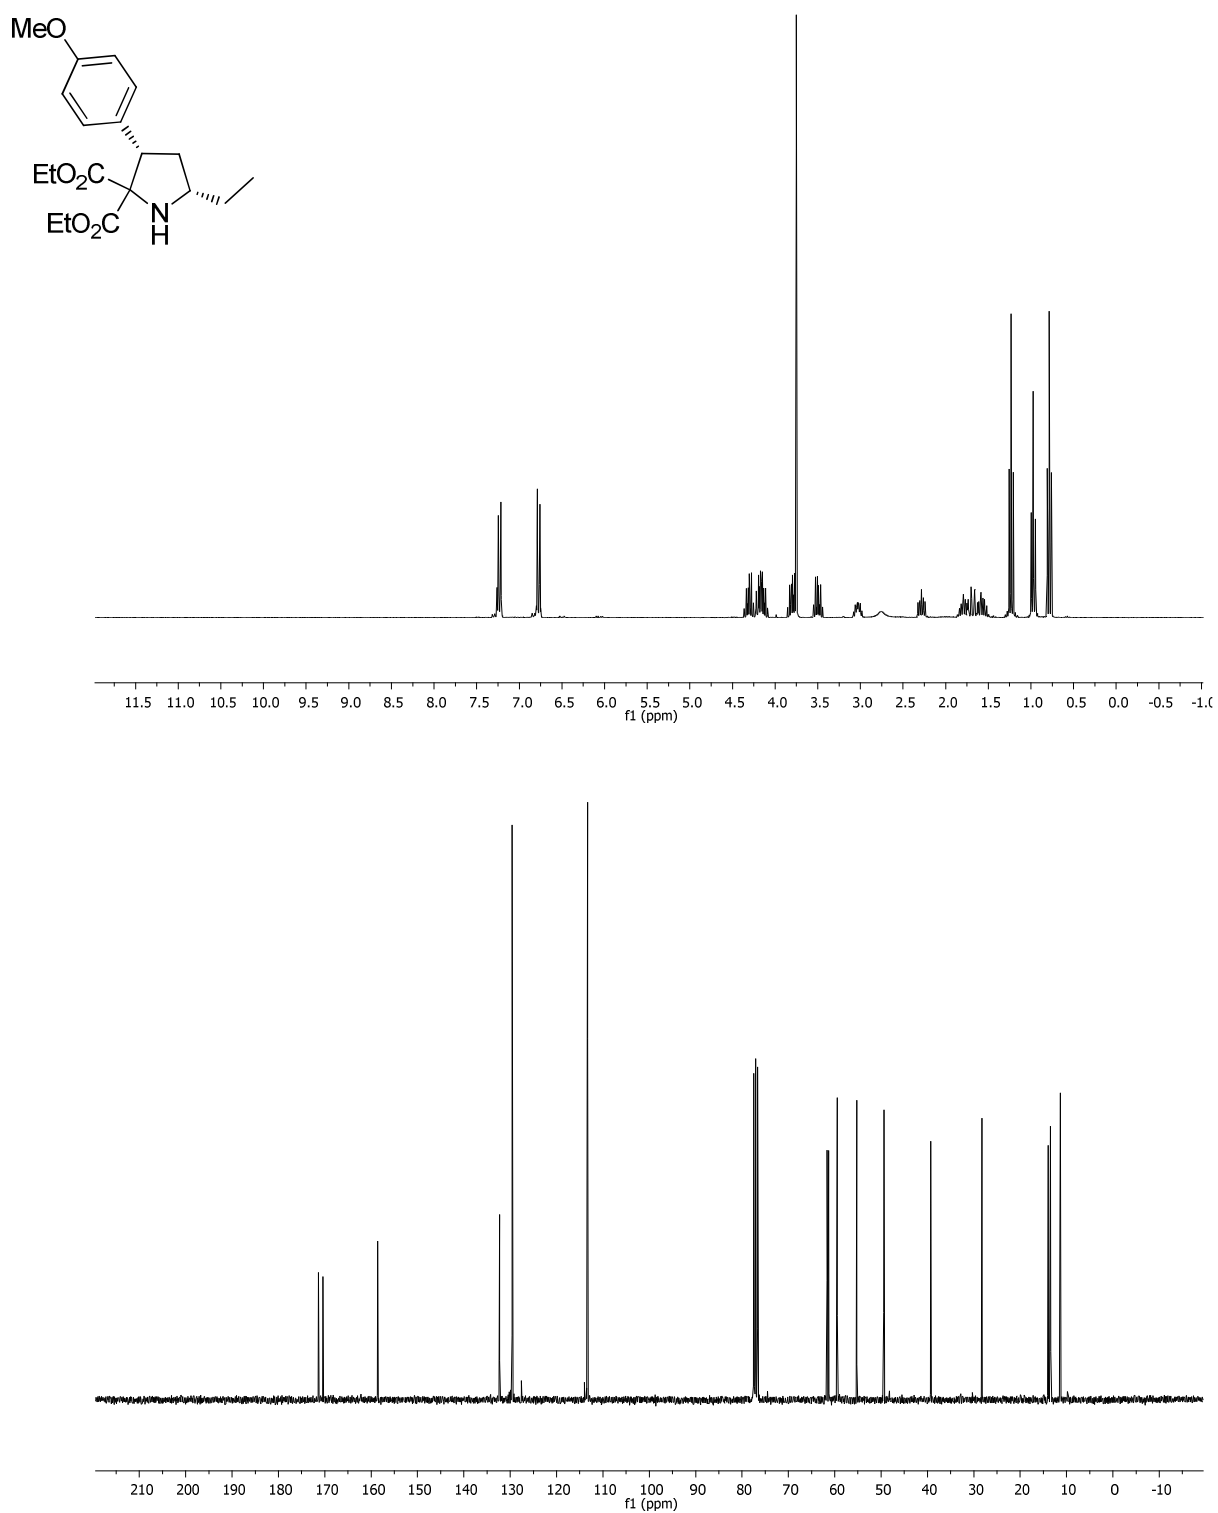

Figure 15:  $^1\text{H-NMR}$  and  $^{13}\text{C-NMR}$  spectra for compound **4o**.

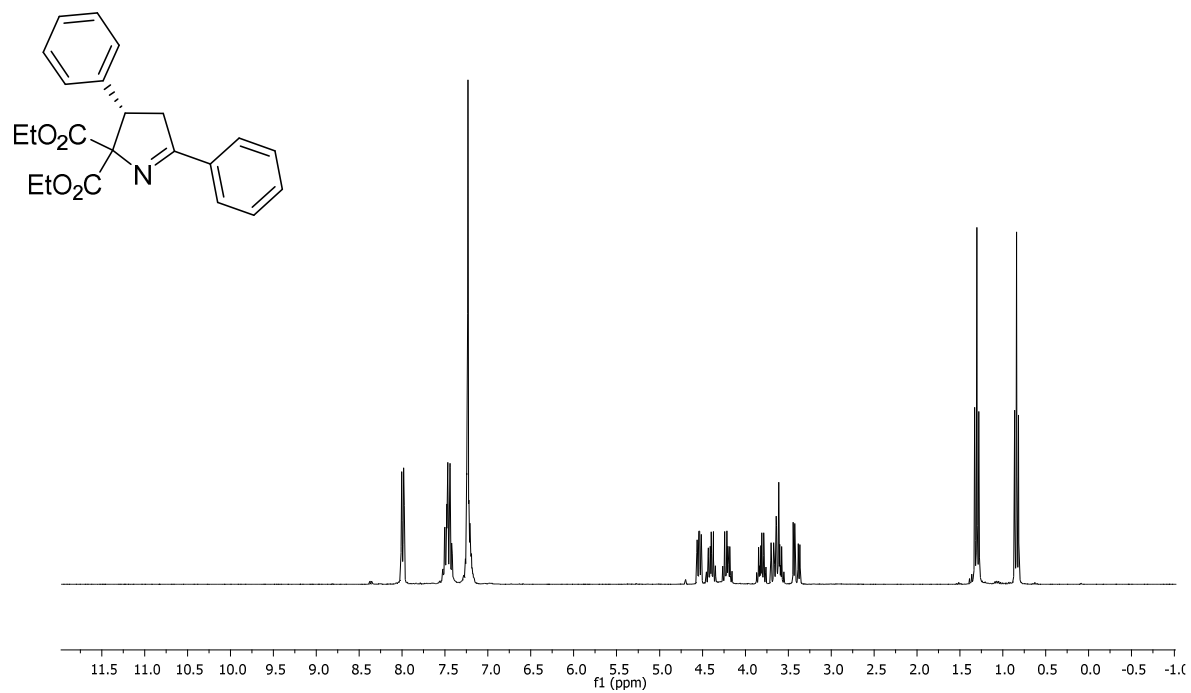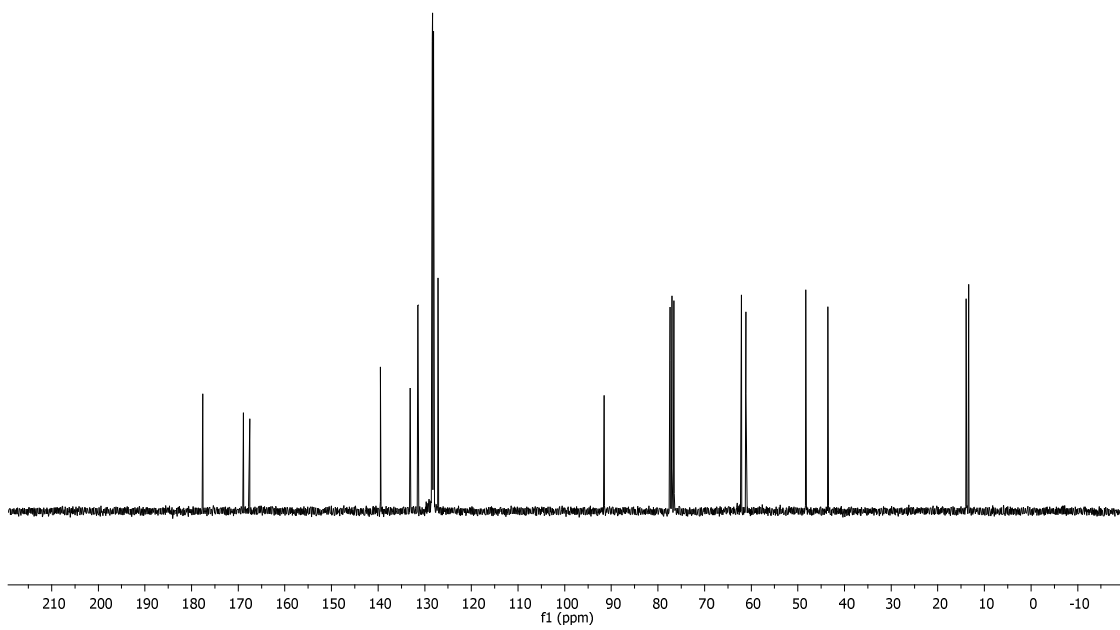

Figure 16: <sup>1</sup>H-NMR and <sup>13</sup>C-NMR spectra for compound 4p.

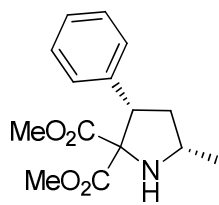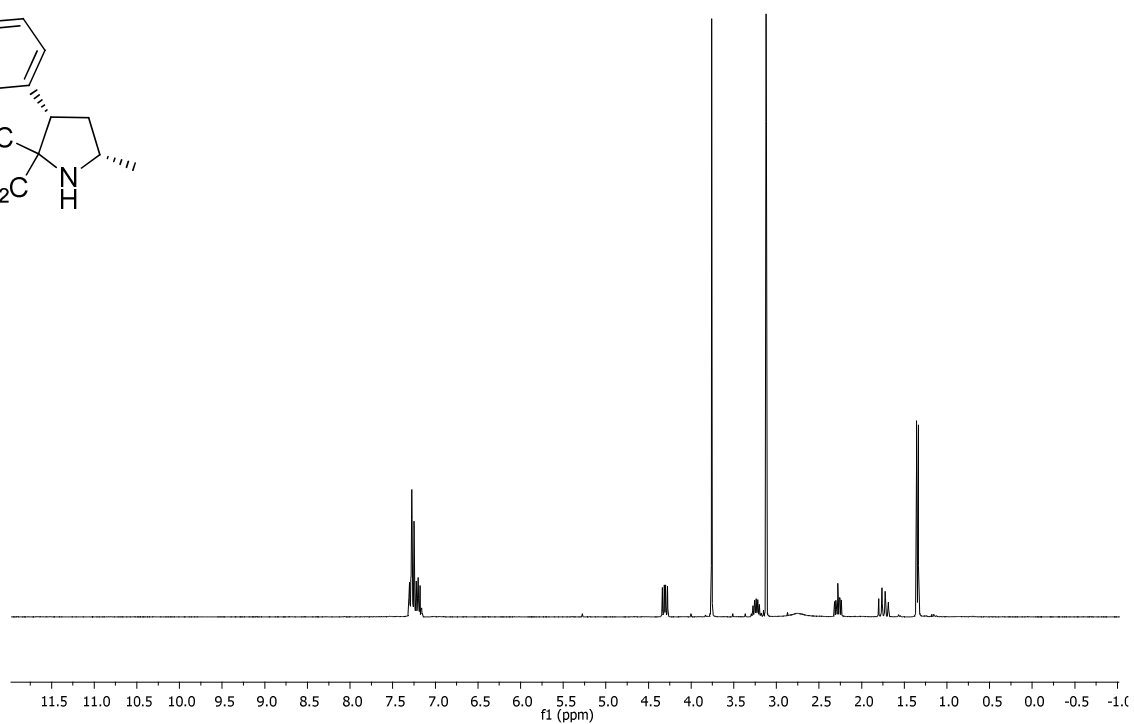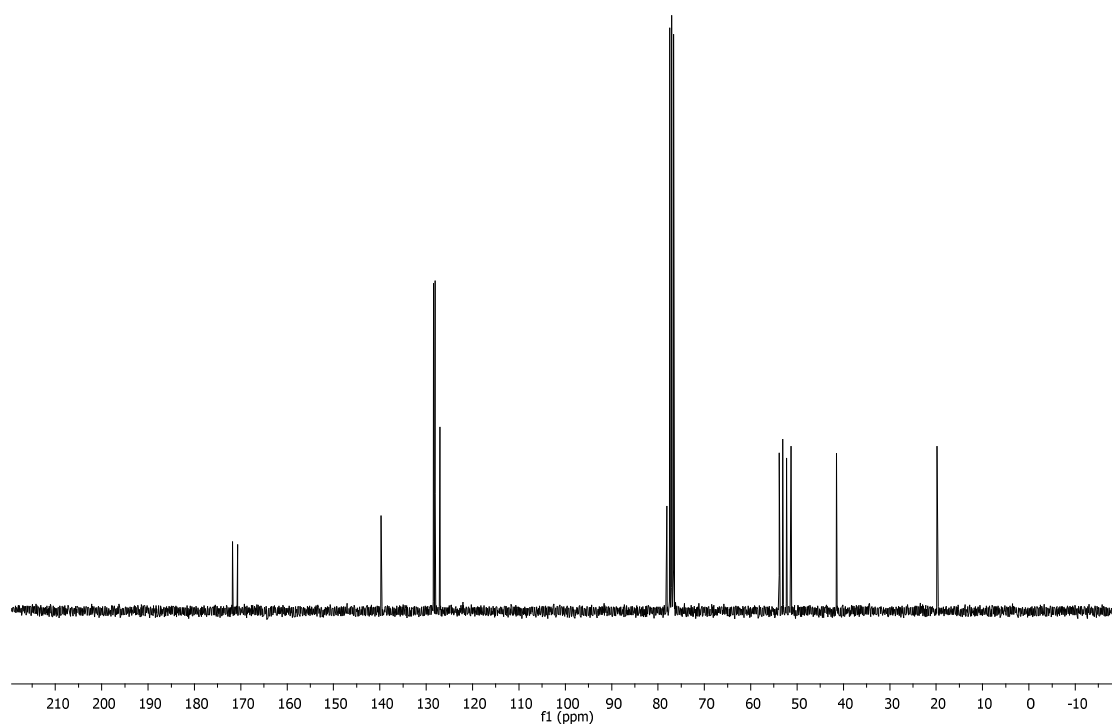

Figure 17:  $^1\text{H-NMR}$  and  $^{13}\text{C-NMR}$  spectra for 4r.



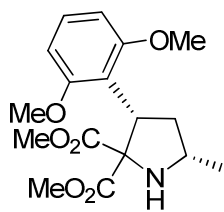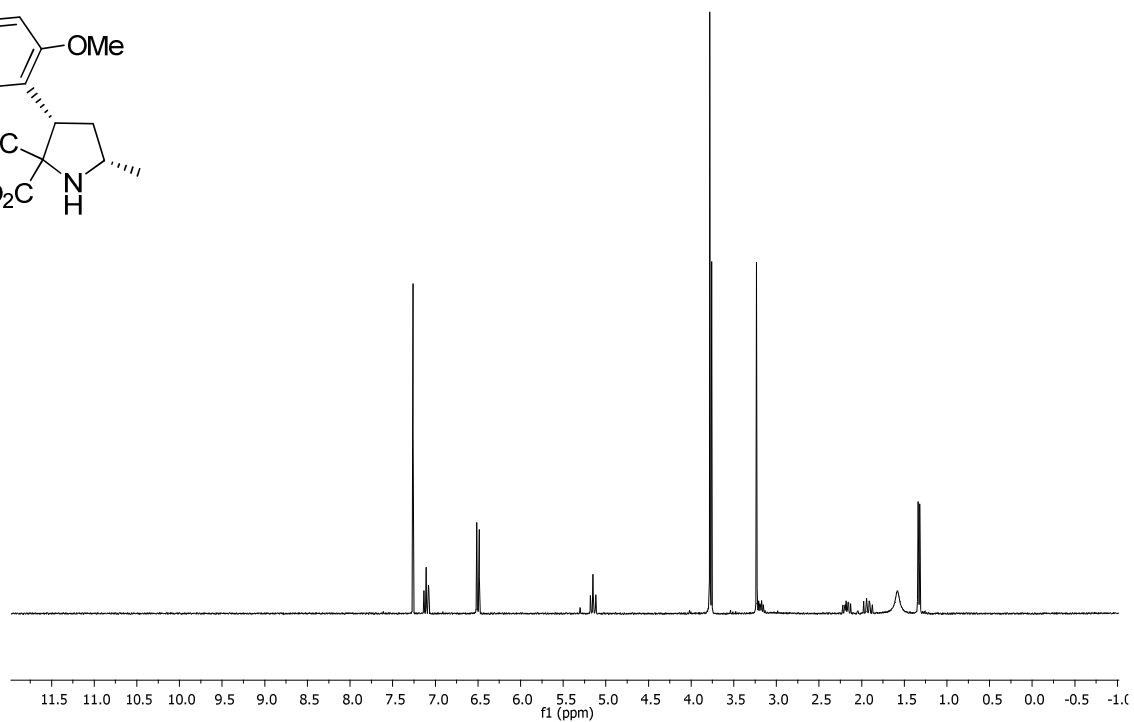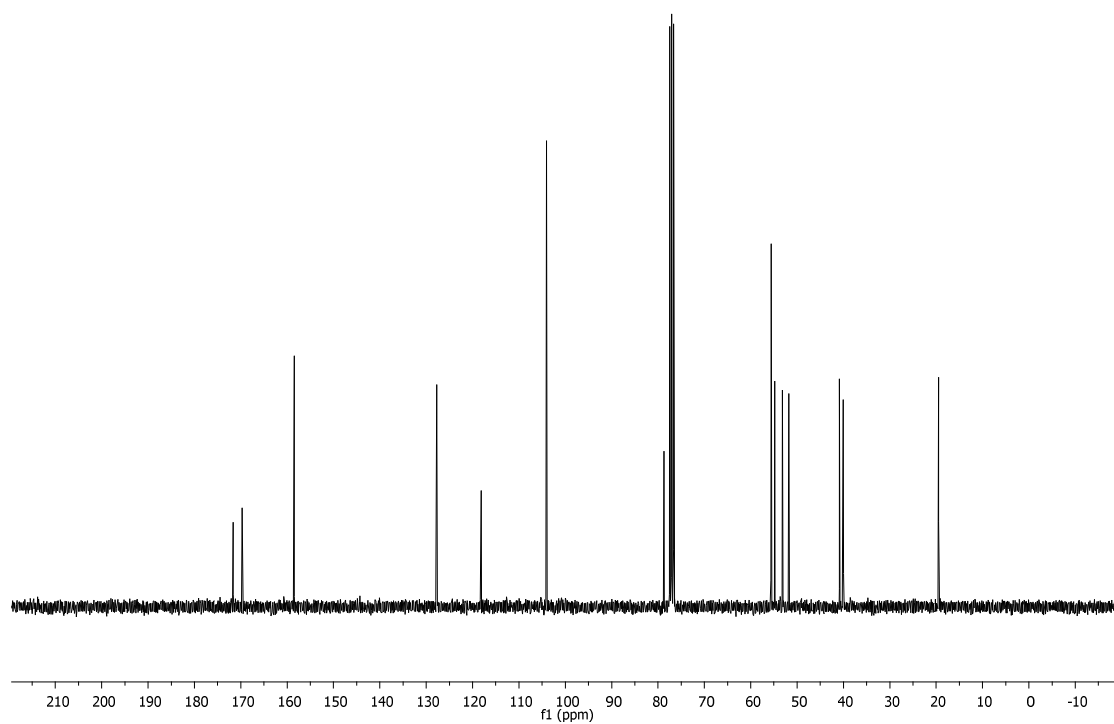

Figure 18: <sup>1</sup>H-NMR and <sup>13</sup>C-NMR spectra for compound 4s.

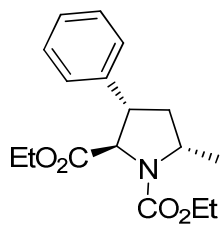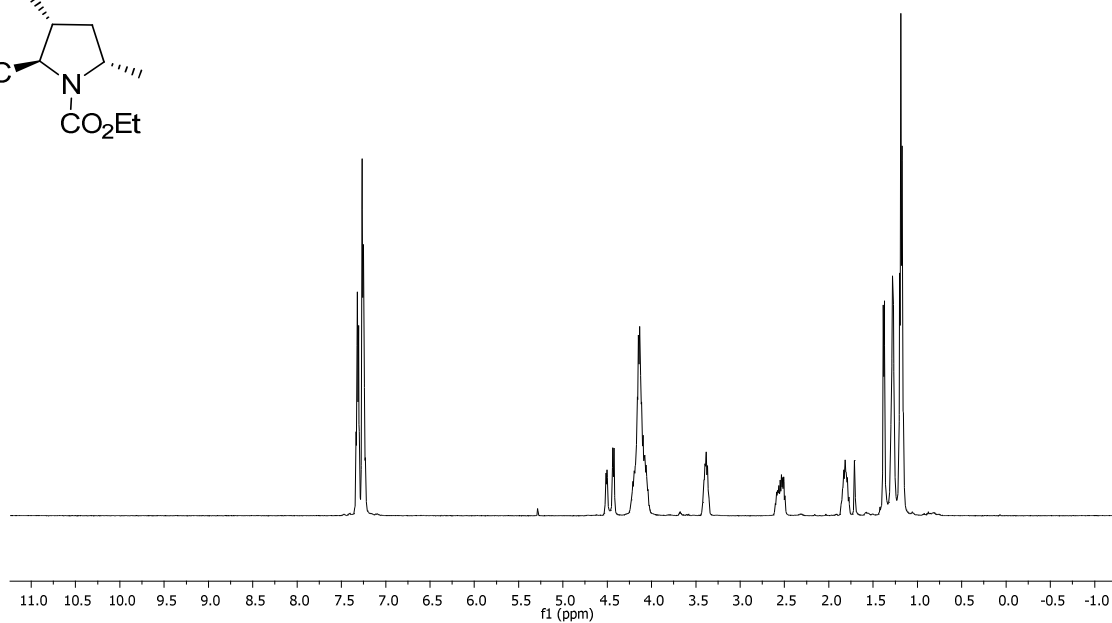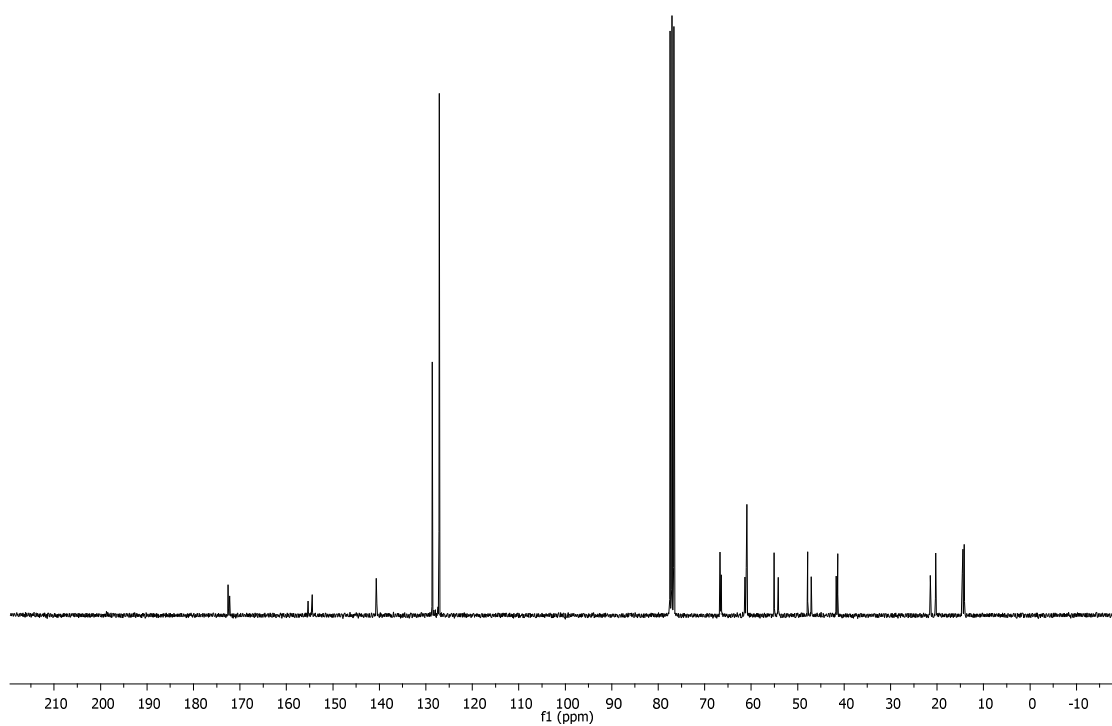

Figure 19:  $^1\text{H-NMR}$  and  $^{13}\text{C-NMR}$  spectra for compound 5a.

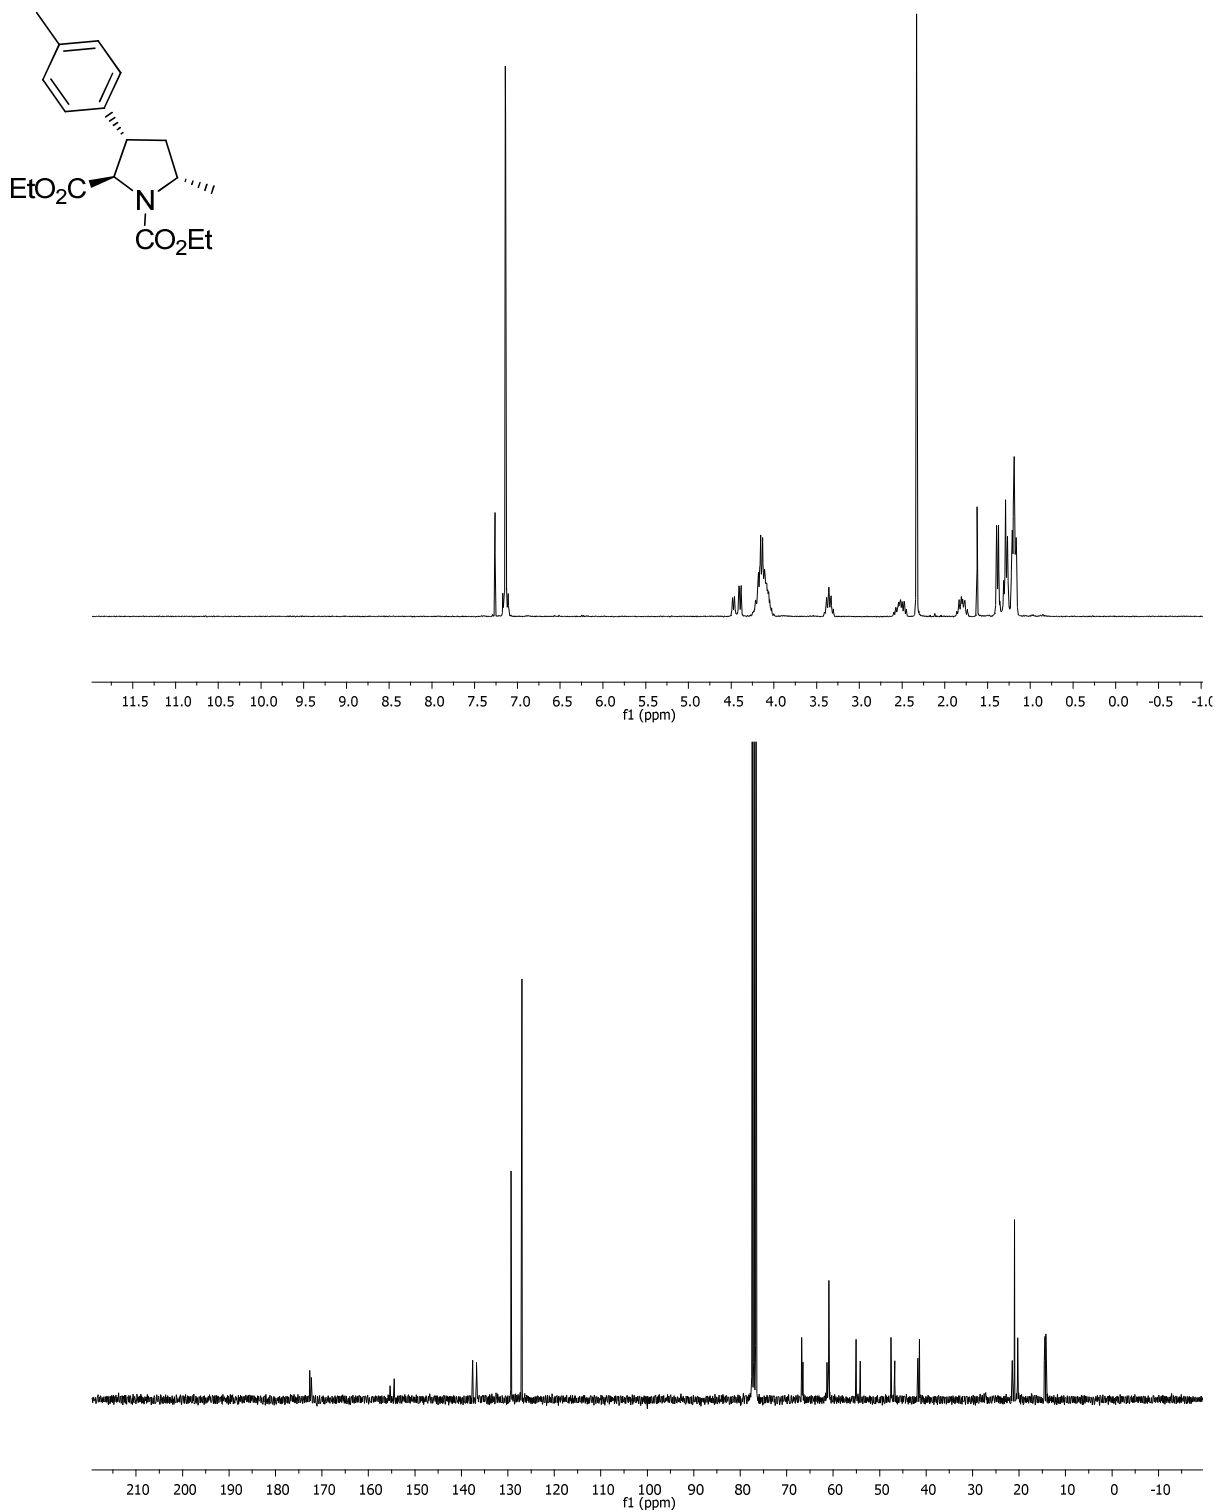

Figure 20:  $^1\text{H-NMR}$  and  $^{13}\text{C-NMR}$  spectra for compound 5b.

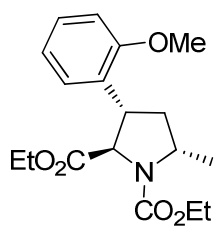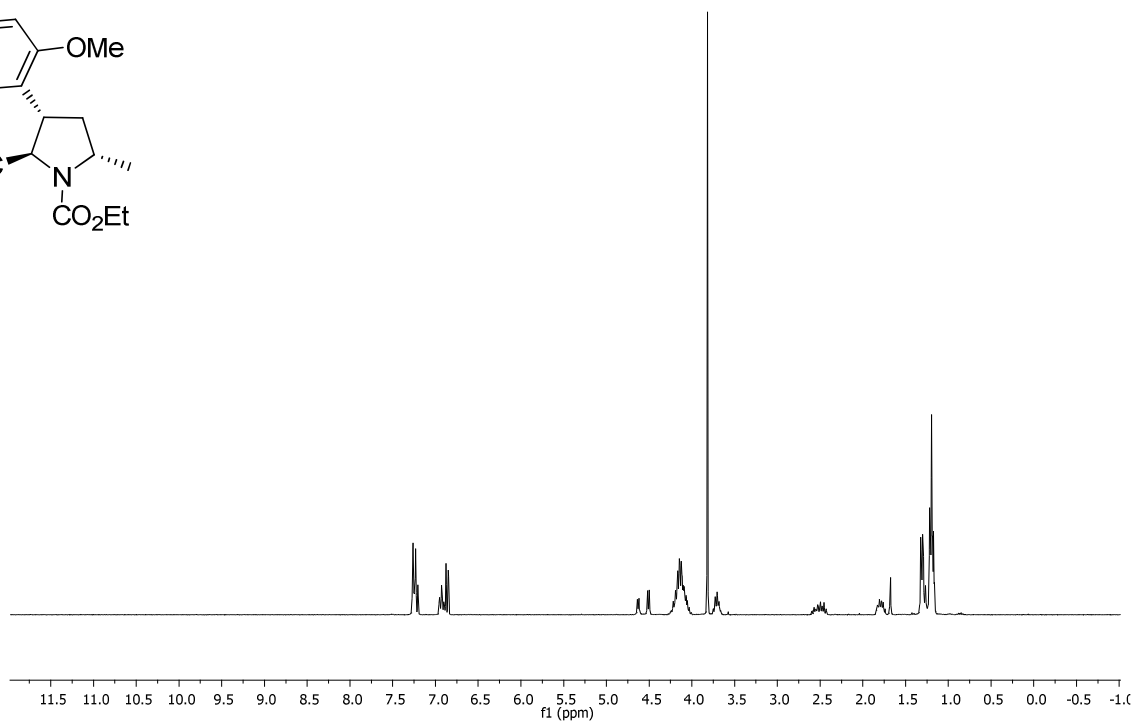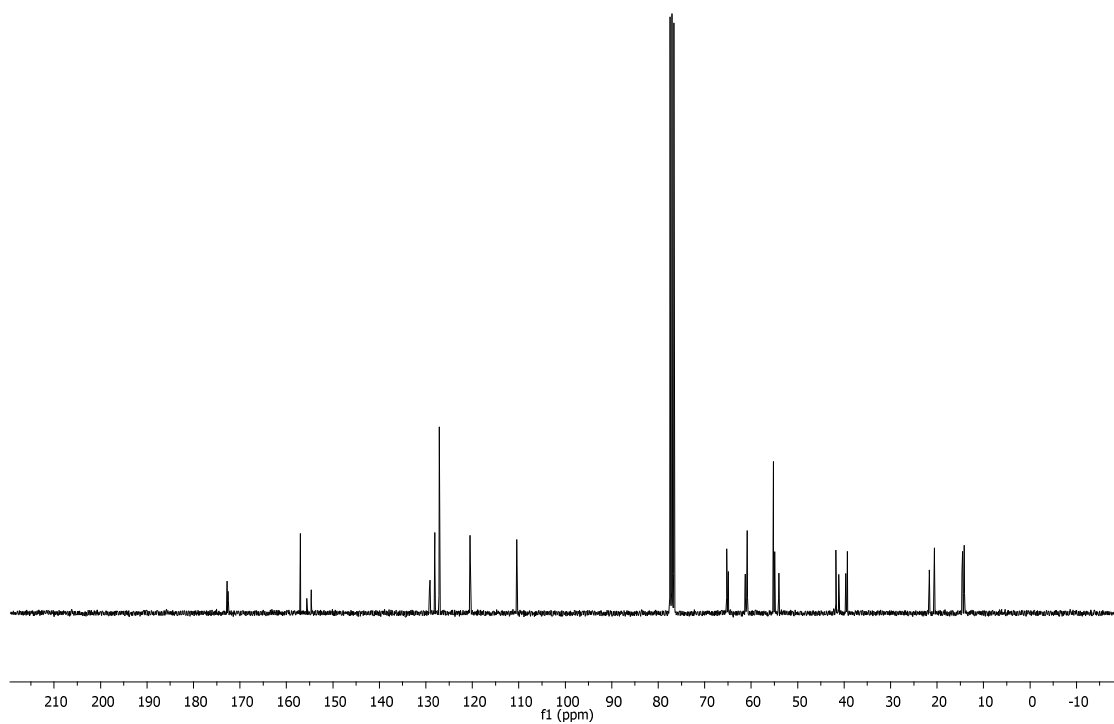

Figure 21:  $^1\text{H-NMR}$  and  $^{13}\text{C-NMR}$  spectra for compound 5c.

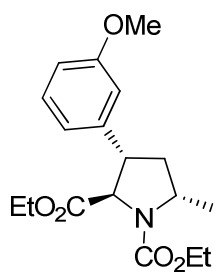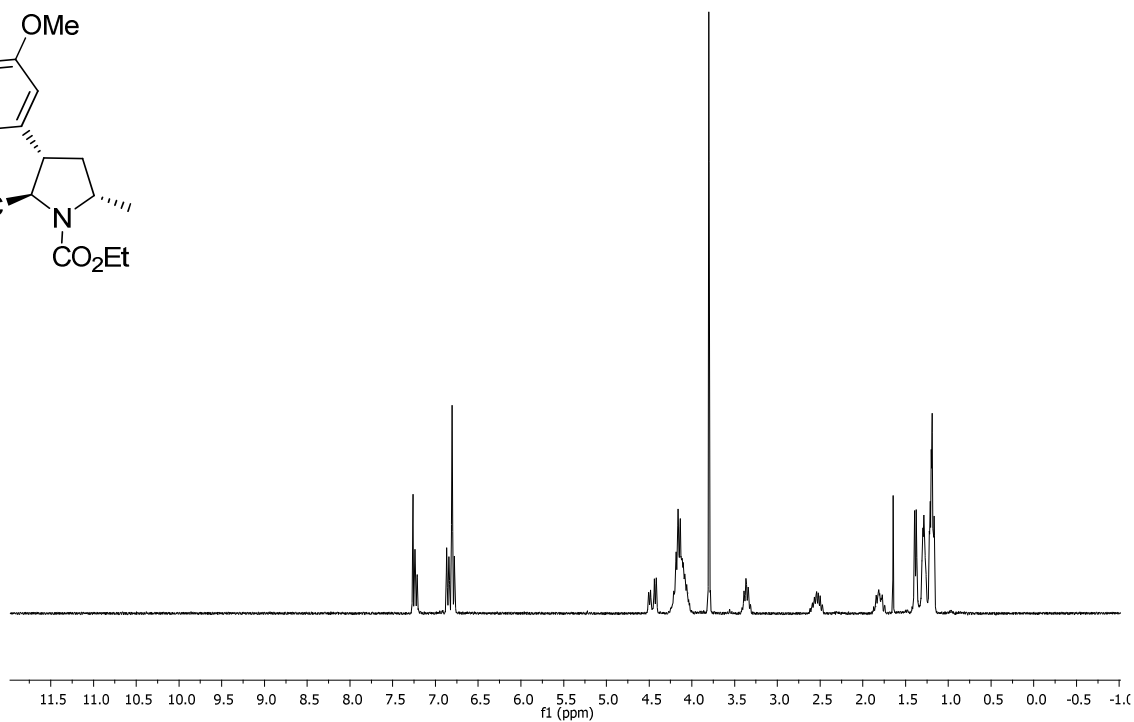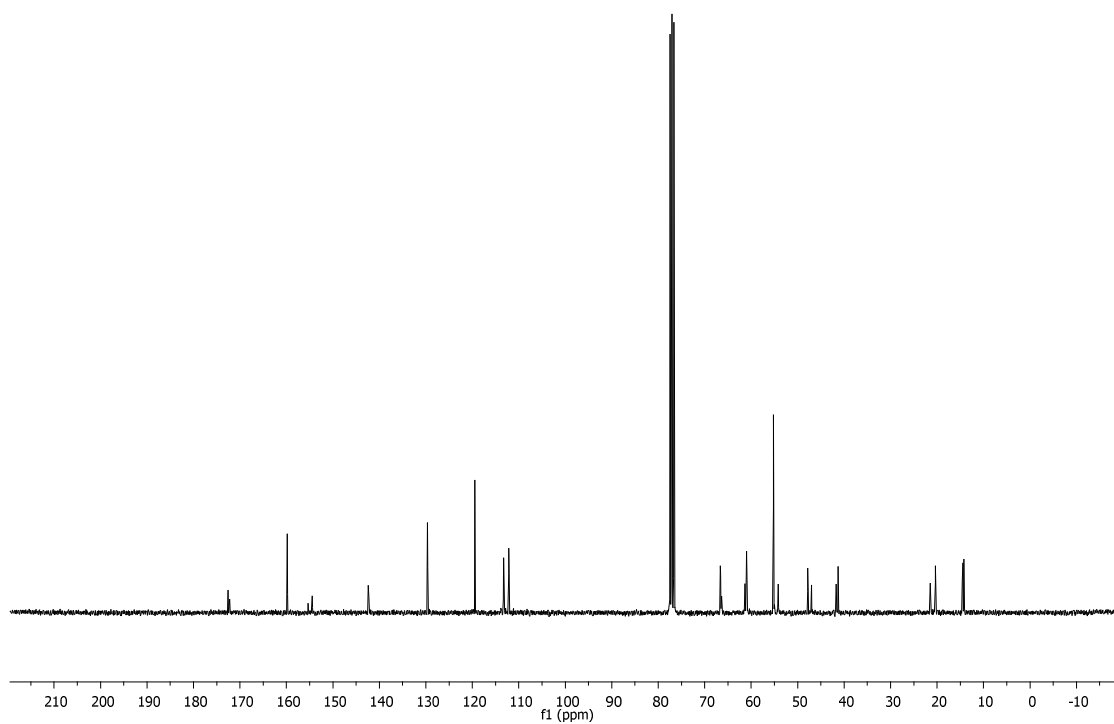

Figure 22: <sup>1</sup>H-NMR and <sup>13</sup>C-NMR spectra for compound 5d.

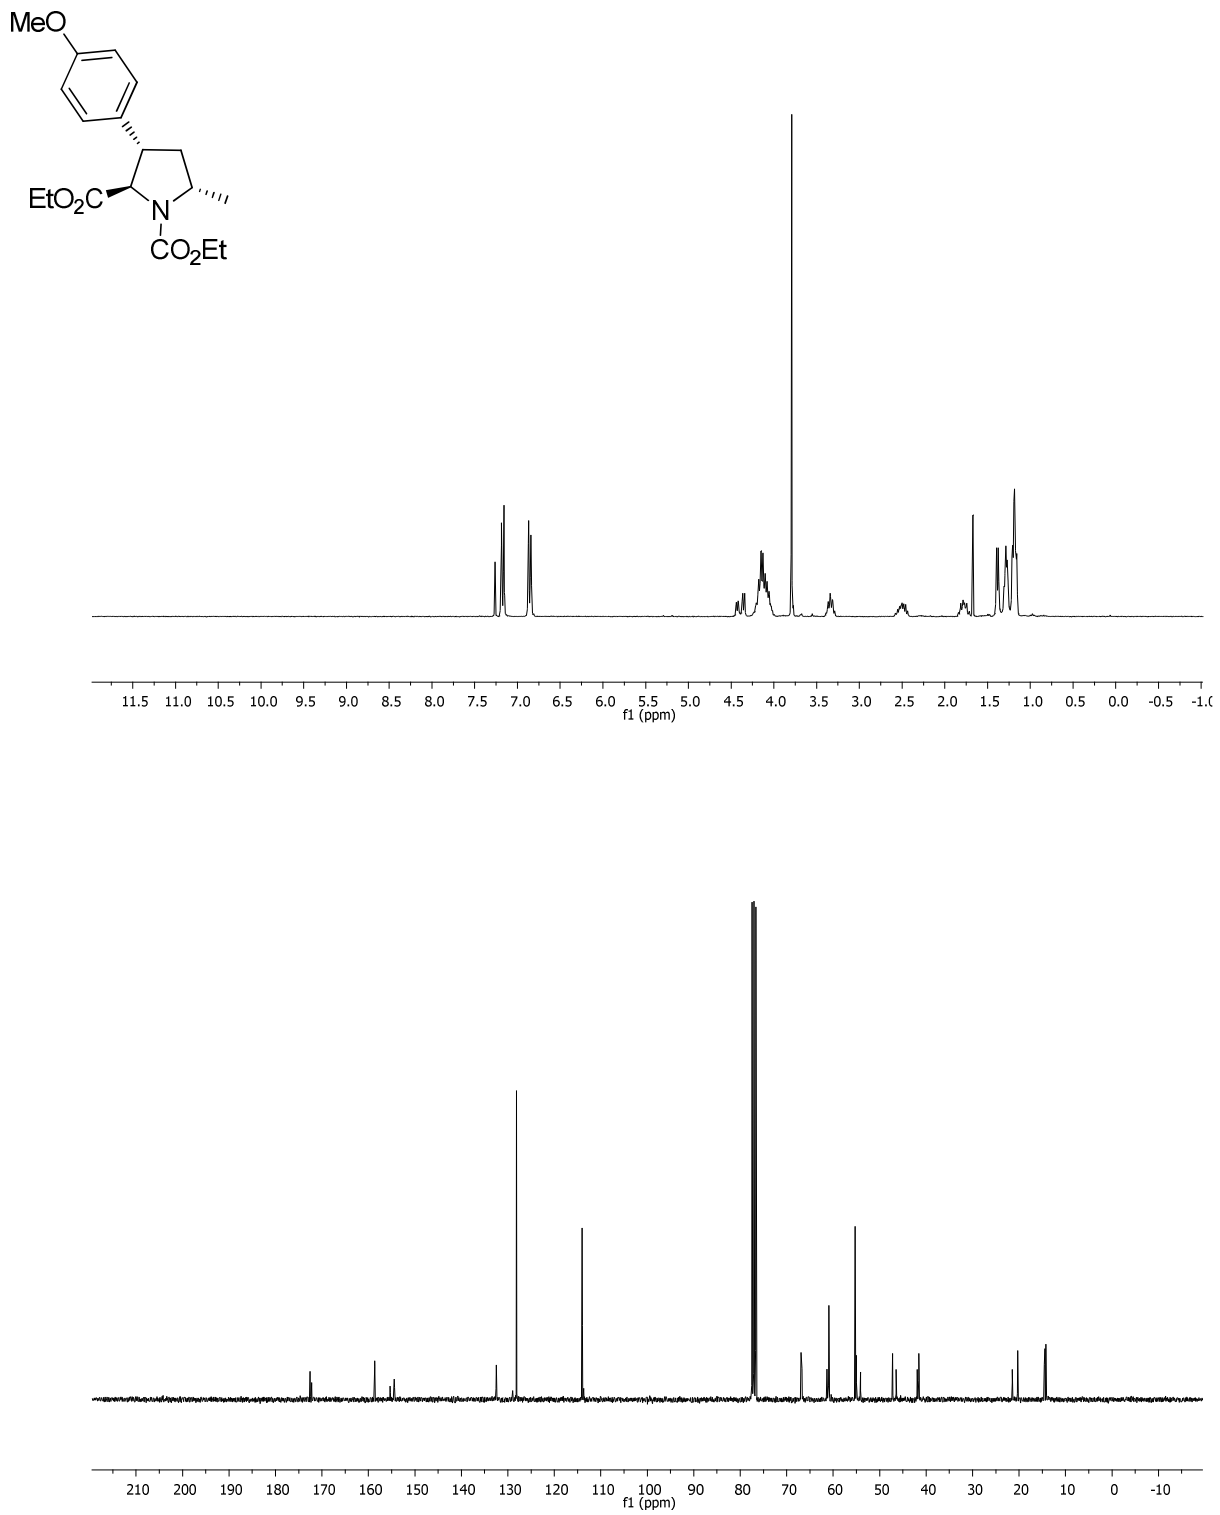

Figure 23:  $^1\text{H-NMR}$  and  $^{13}\text{C-NMR}$  spectra for compound 5e.

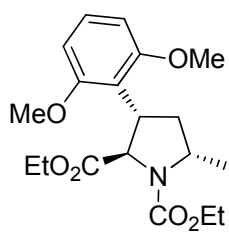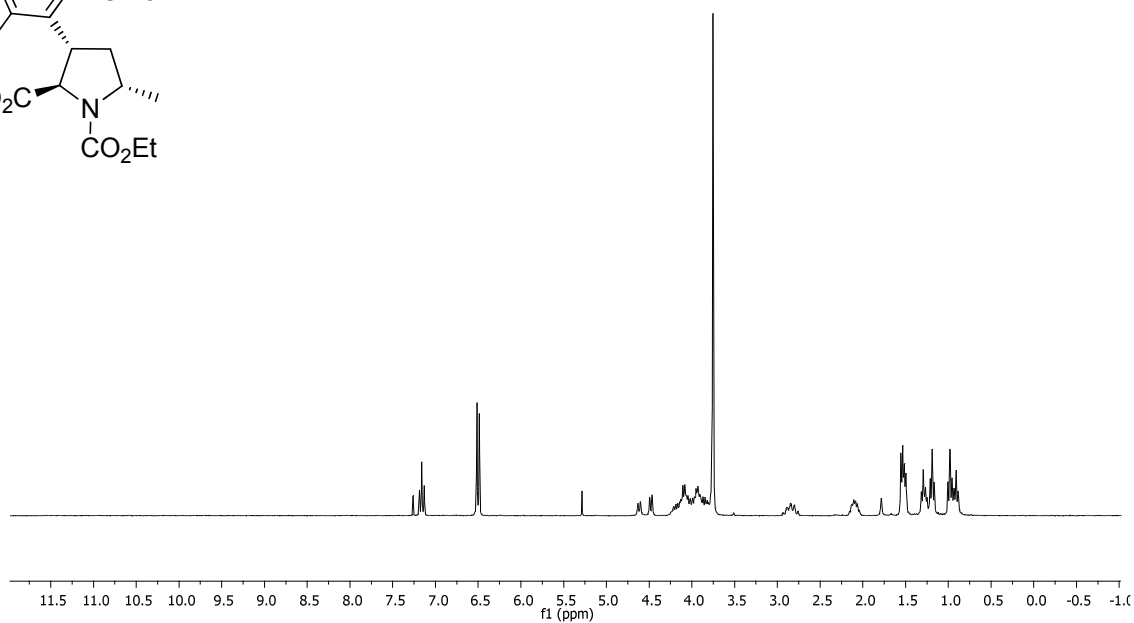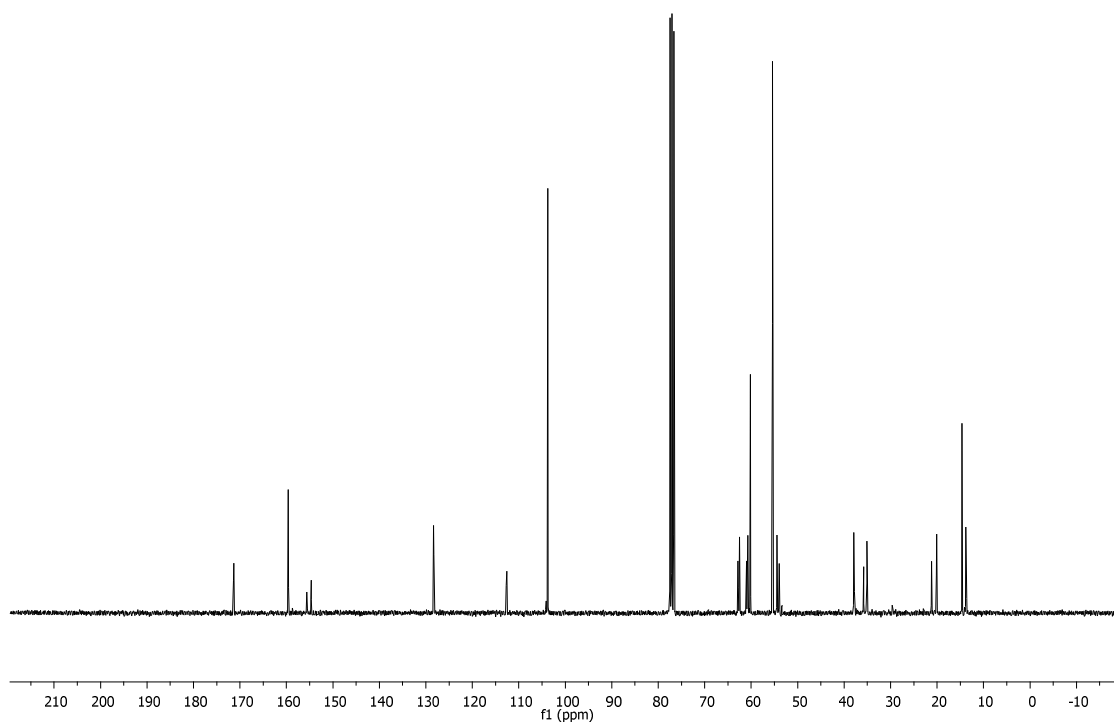

Figure 24: <sup>1</sup>H-NMR and <sup>13</sup>C-NMR spectra for compound 5f.

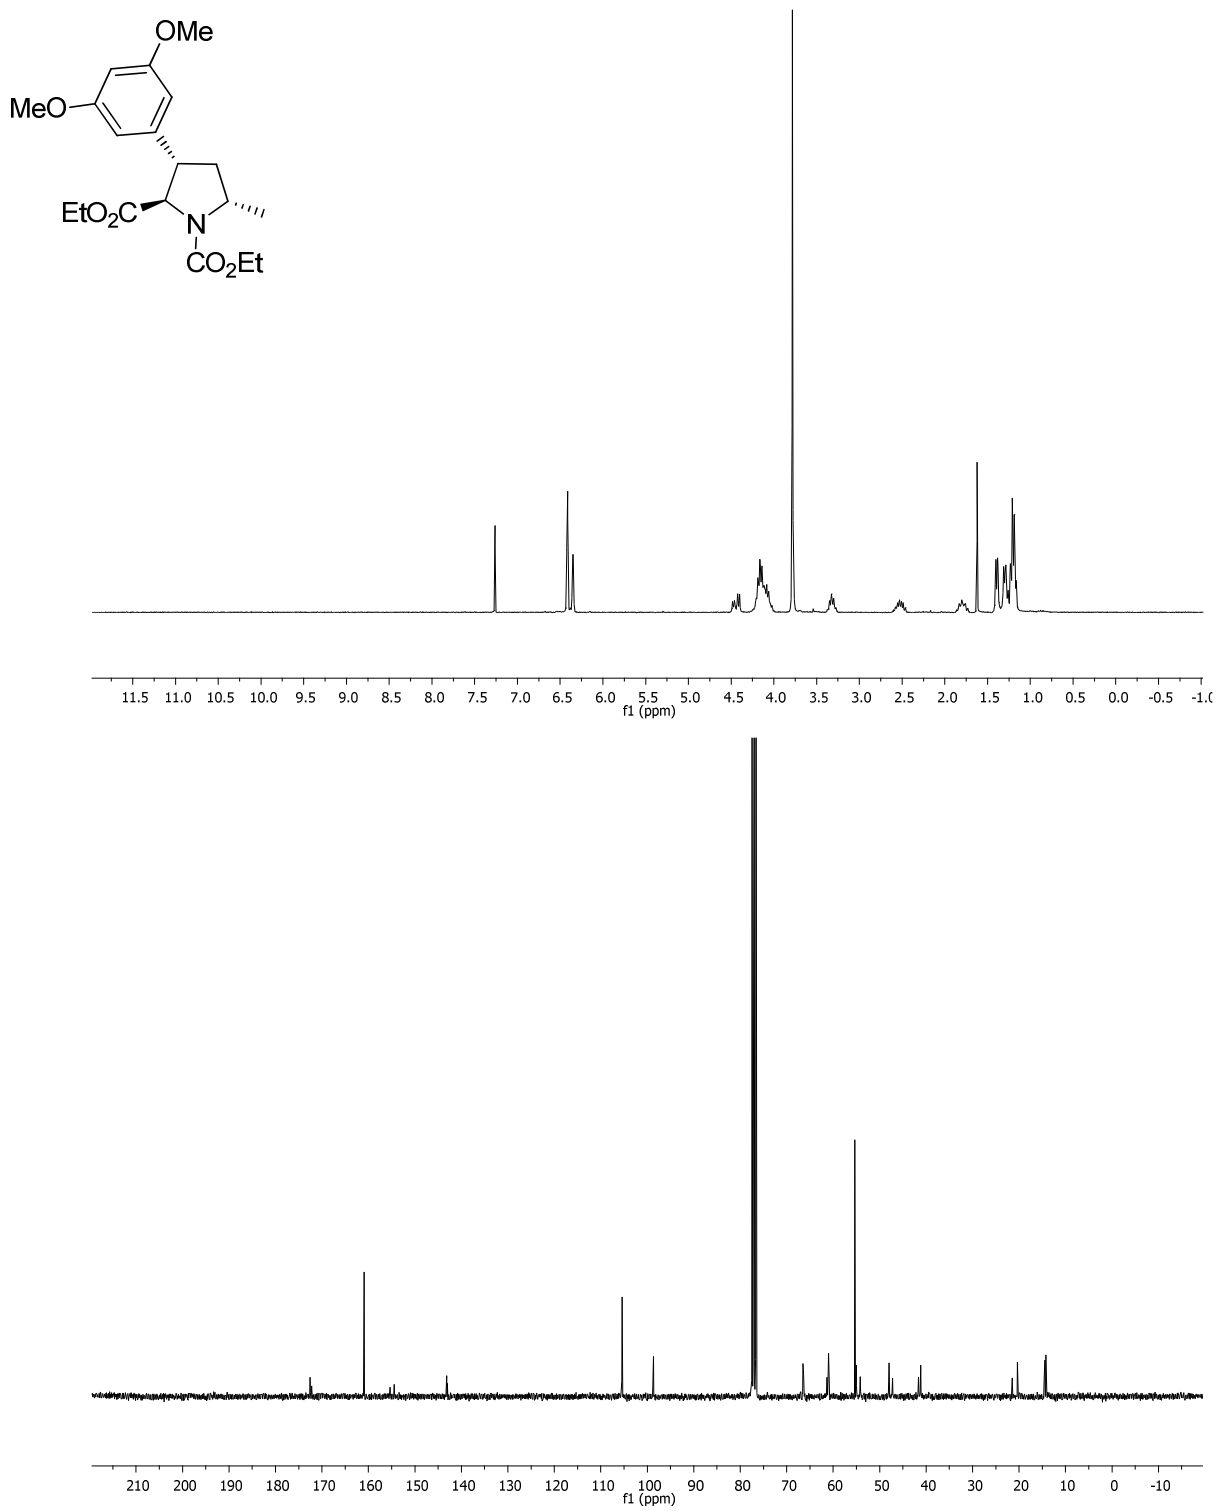

Figure 25:  $^1\text{H-NMR}$  and  $^{13}\text{C-NMR}$  spectra for compound **5g**.



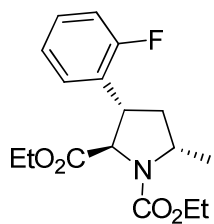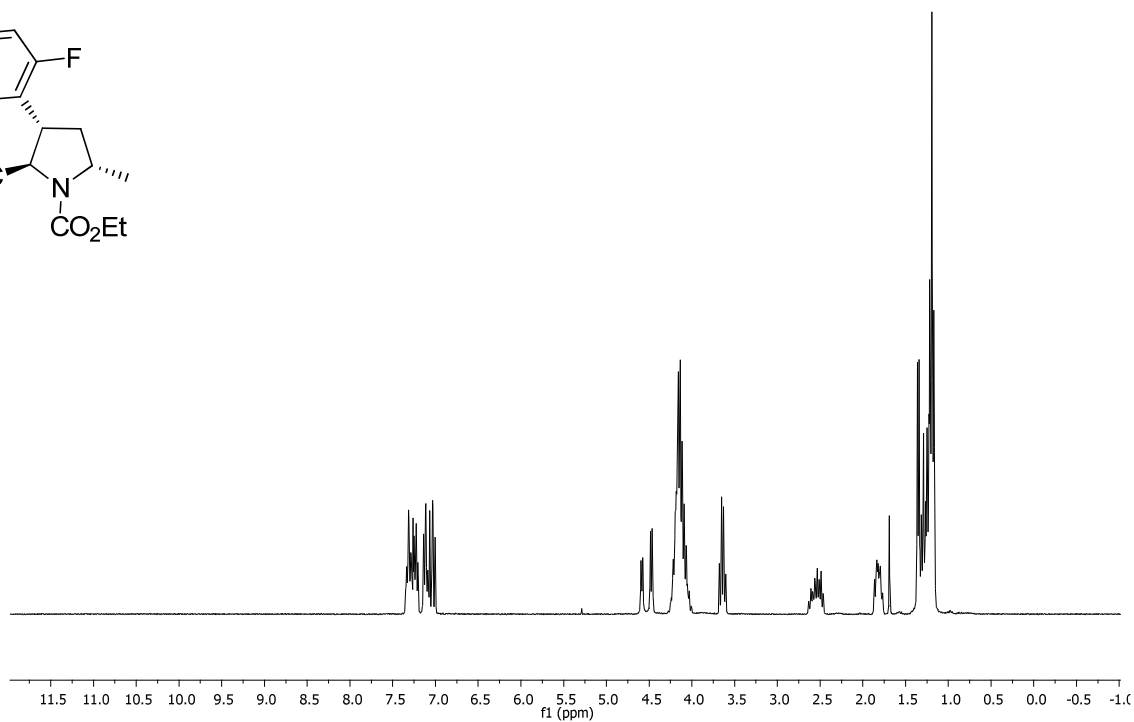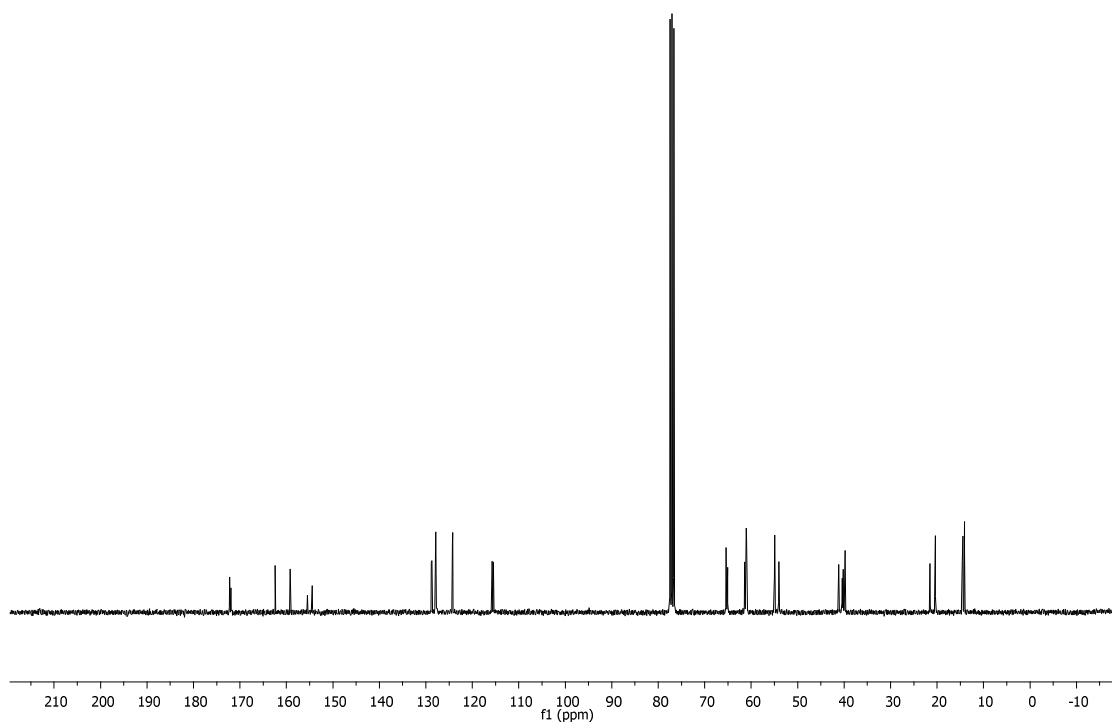

Figure 26:  $^1\text{H-NMR}$  and  $^{13}\text{C-NMR}$  spectra for compound 5h.

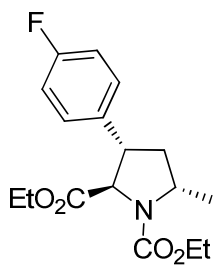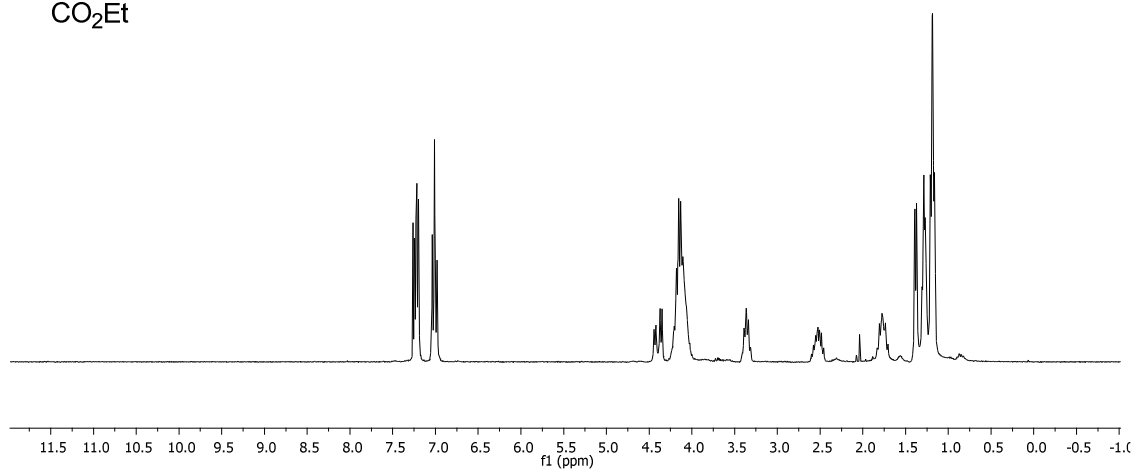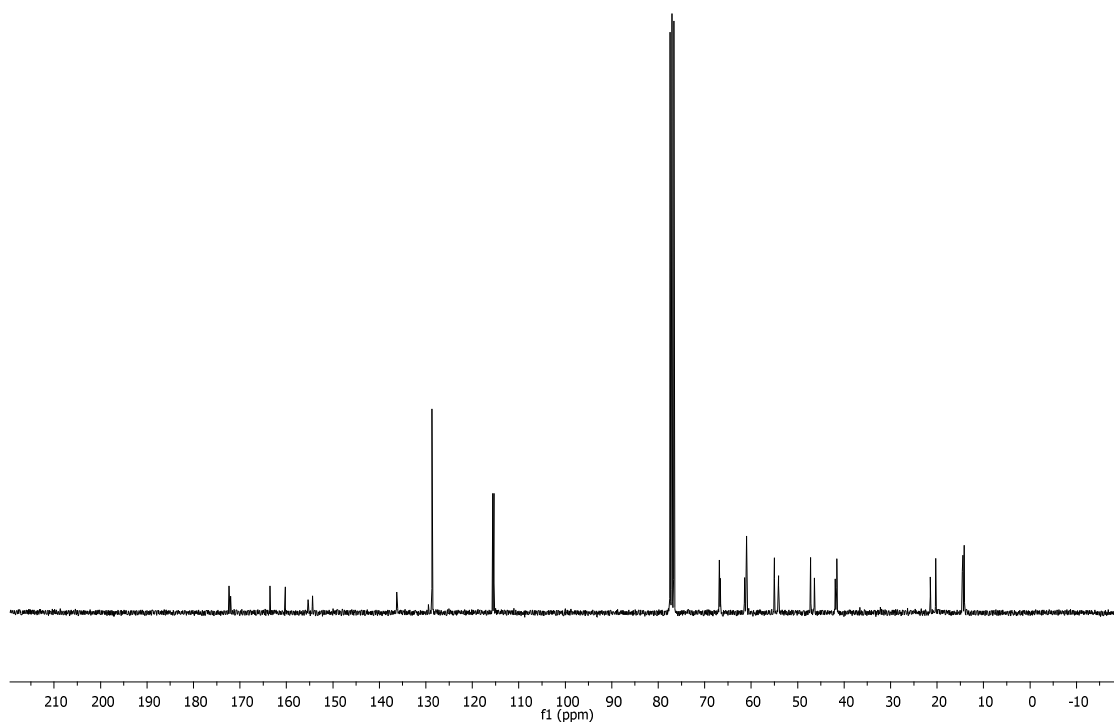

Figure 27: <sup>1</sup>H-NMR and <sup>13</sup>C-NMR spectra for compound 5i.

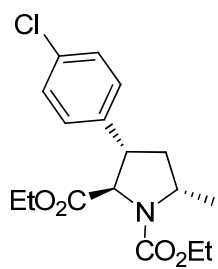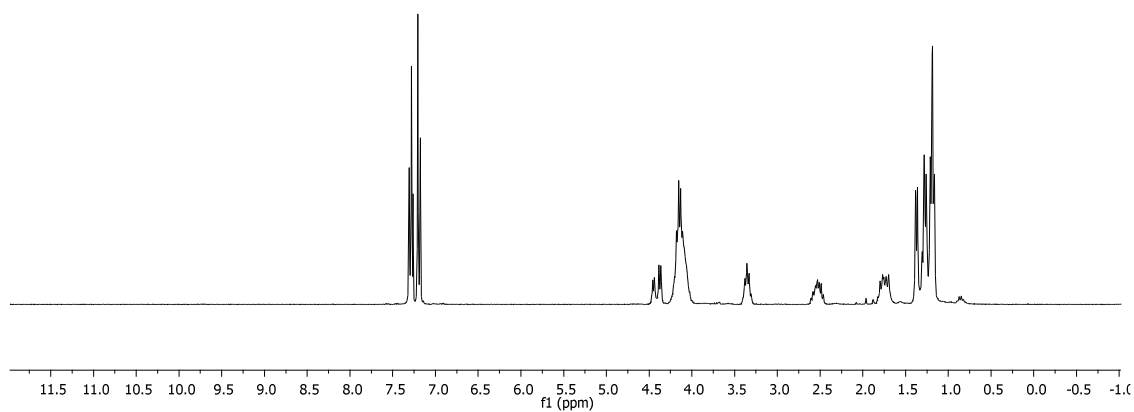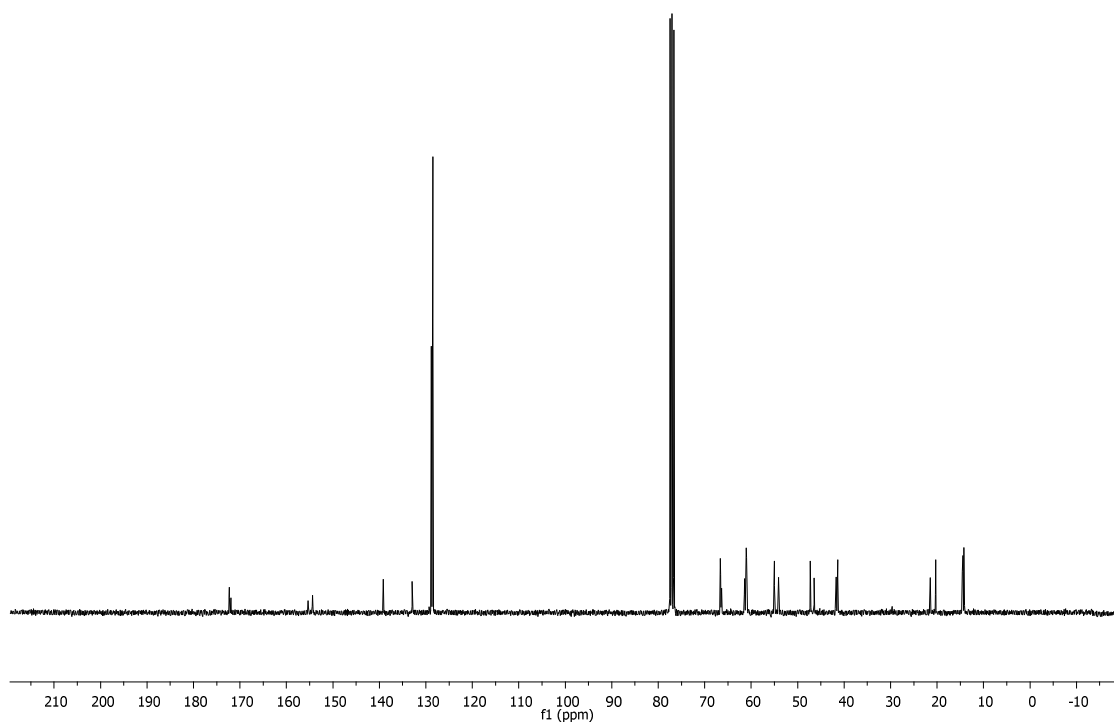

Figure 28: <sup>1</sup>H-NMR and <sup>13</sup>C-NMR spectra for compound 5j.

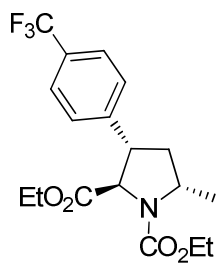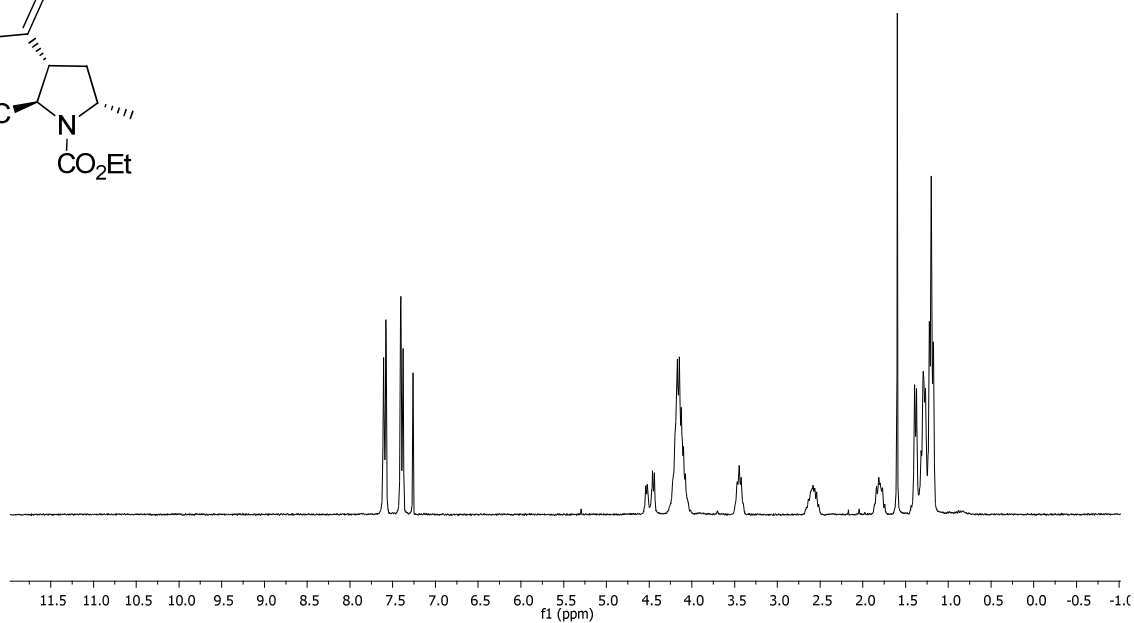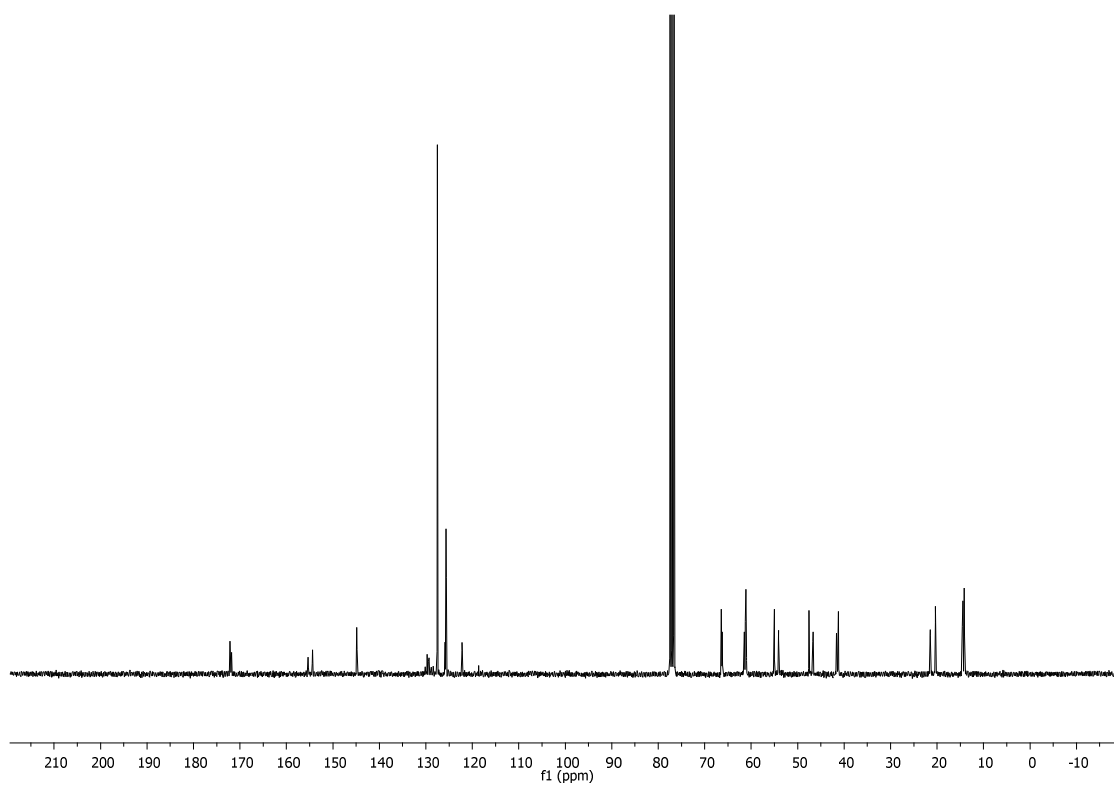

Figure 29:  $^1\text{H-NMR}$  and  $^{13}\text{C-NMR}$  spectra for compound 5k.

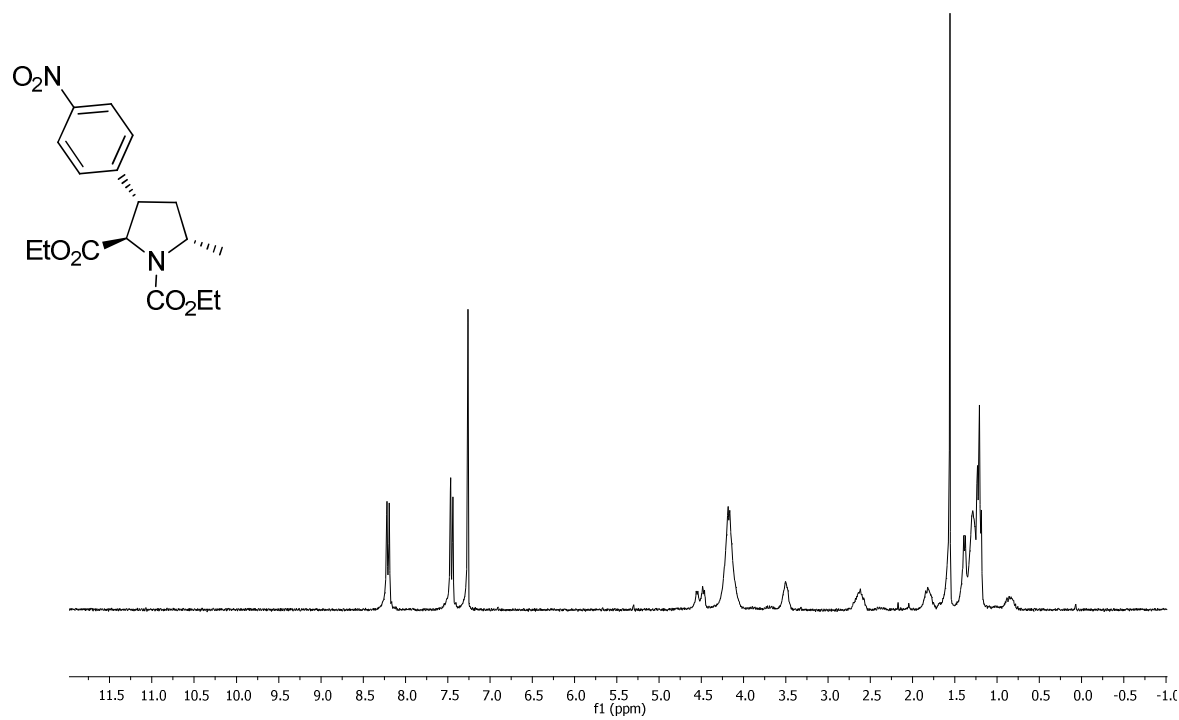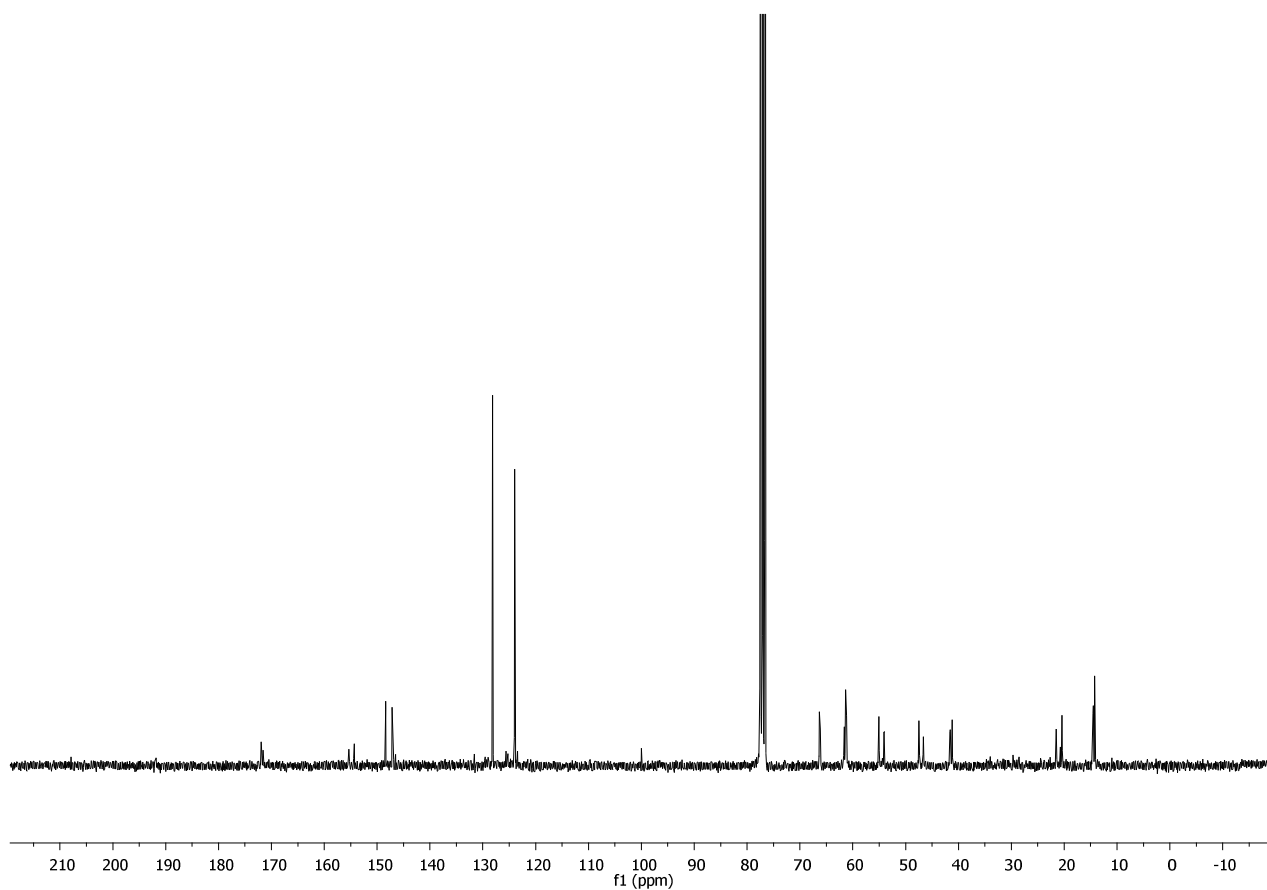

Figure 30:  $^1\text{H-NMR}$  and  $^{13}\text{C-NMR}$  spectra for compound **5I**.

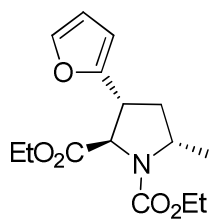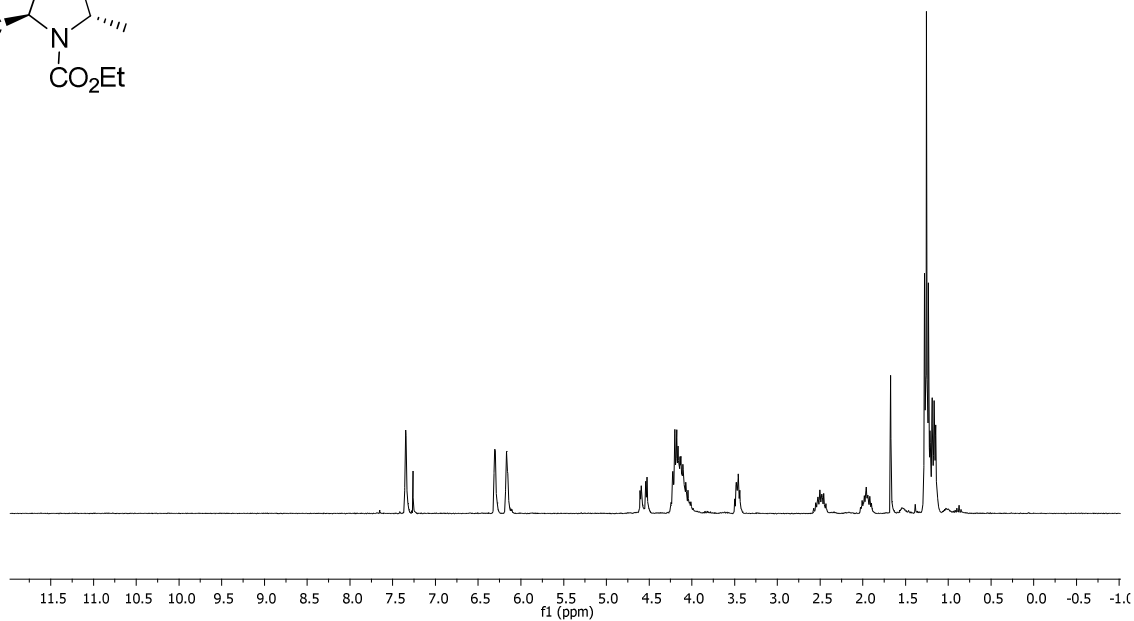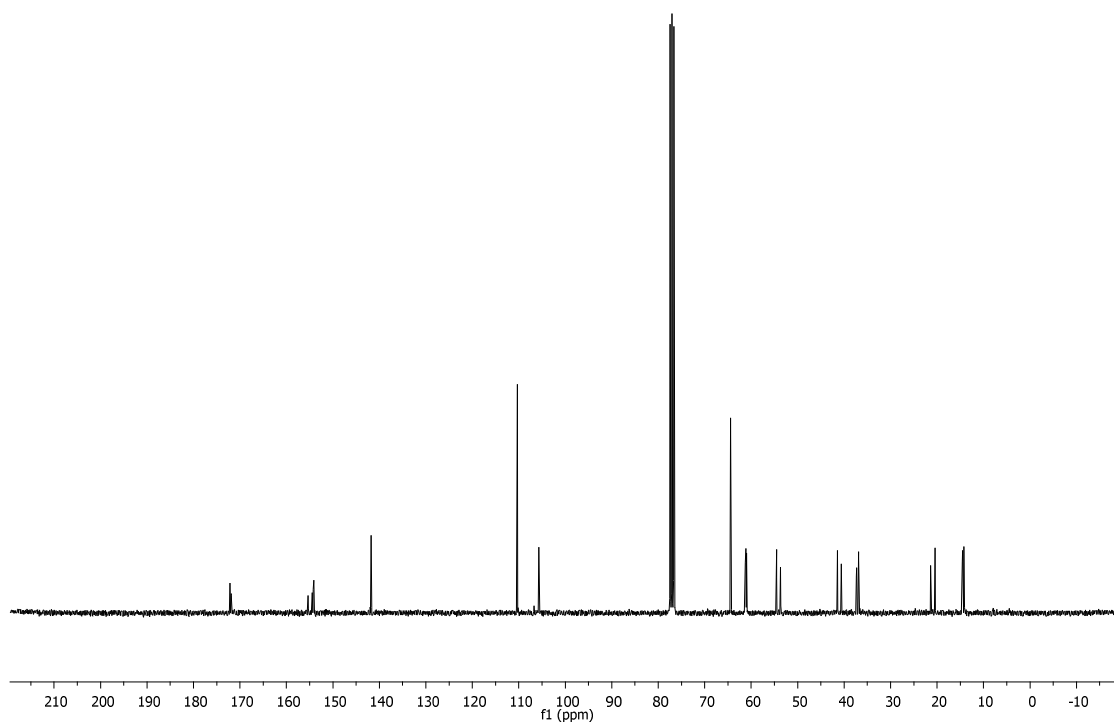

Figure 31: <sup>1</sup>H-NMR and <sup>13</sup>C-NMR spectra for compound 5m.

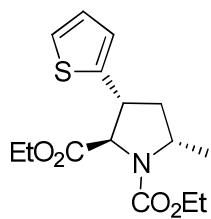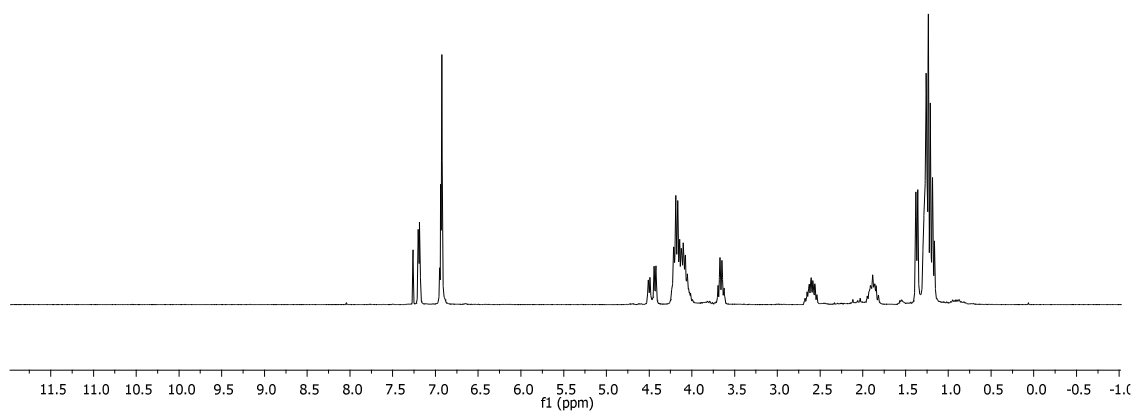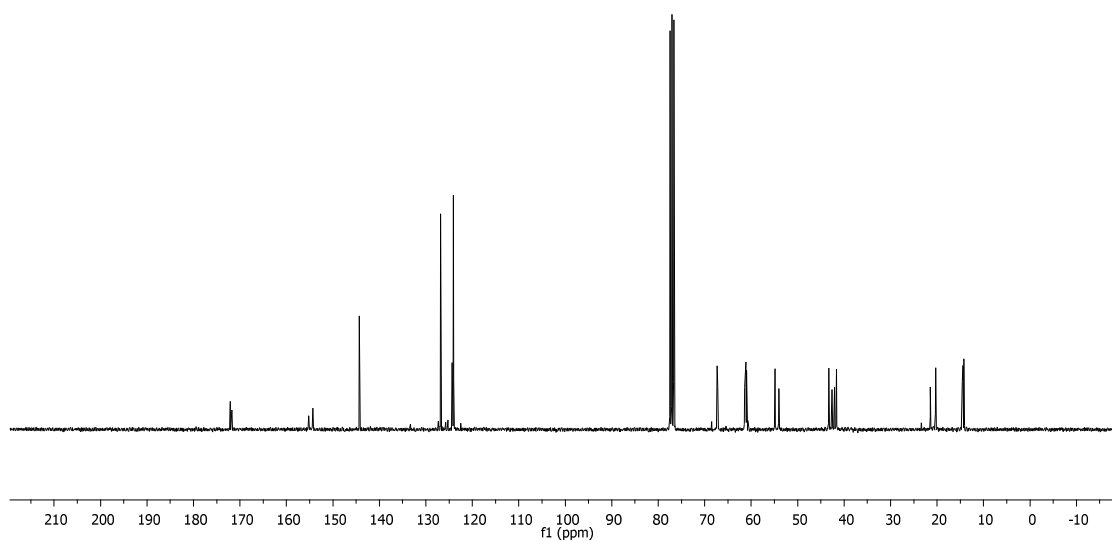

Figure 32:  $^1\text{H-NMR}$  and  $^{13}\text{C-NMR}$  spectra for compound 5n.

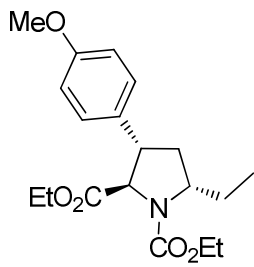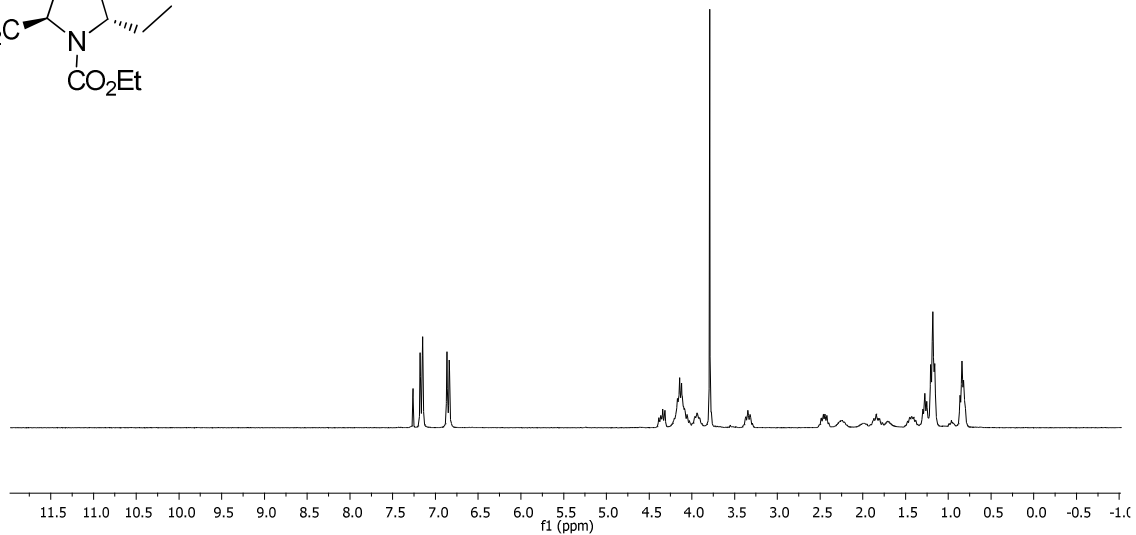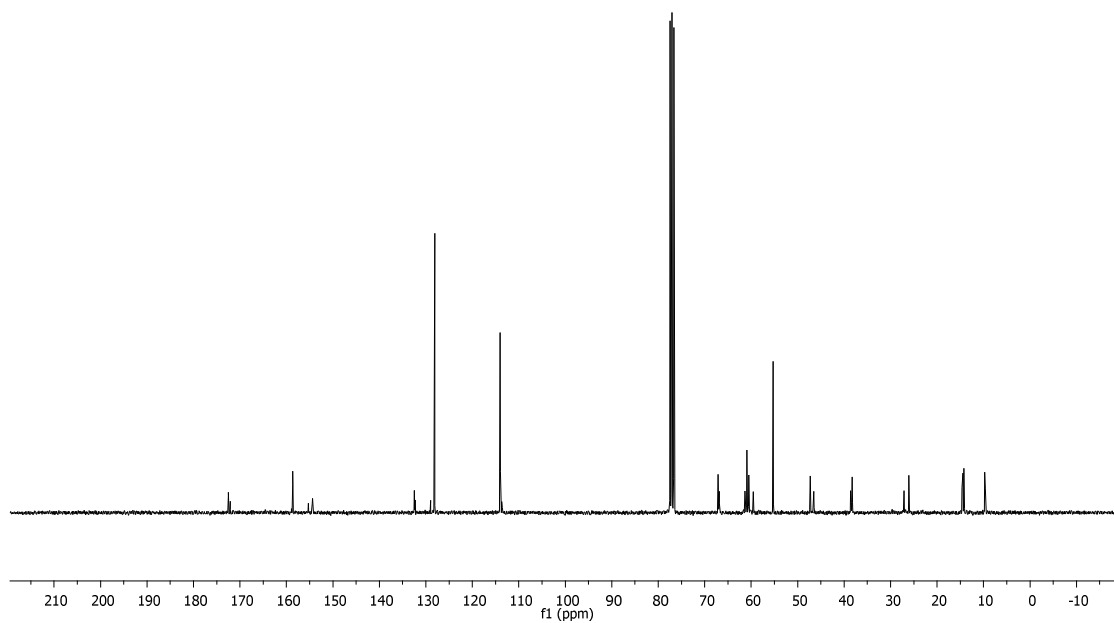

Figure 33:  $^1\text{H-NMR}$  and  $^{13}\text{C-NMR}$  spectra for compound **5o**.



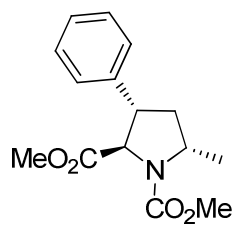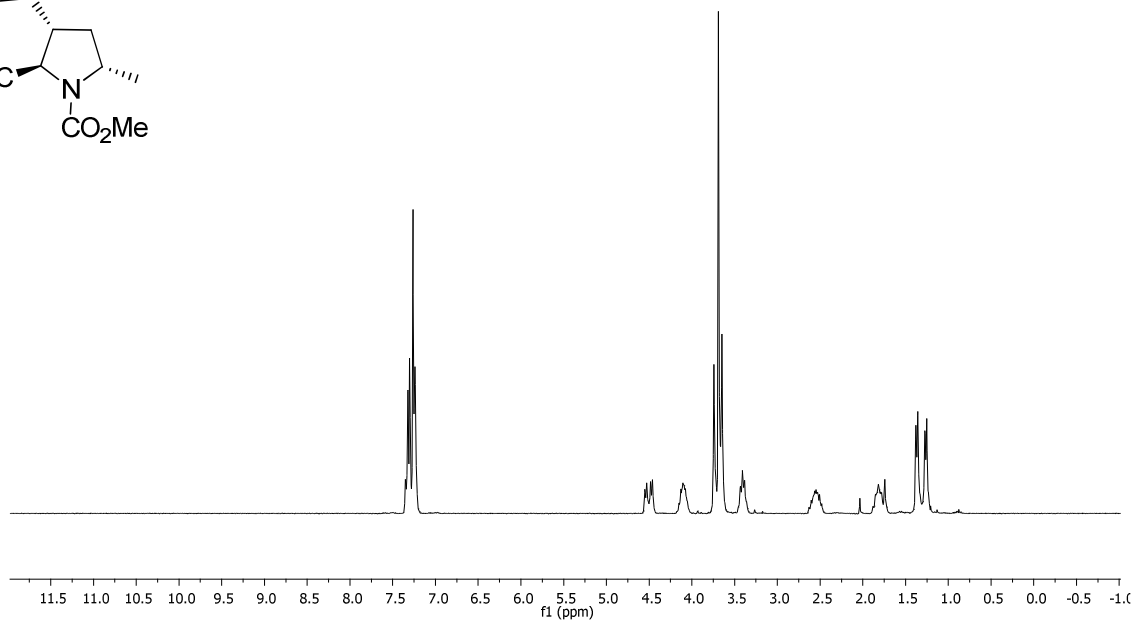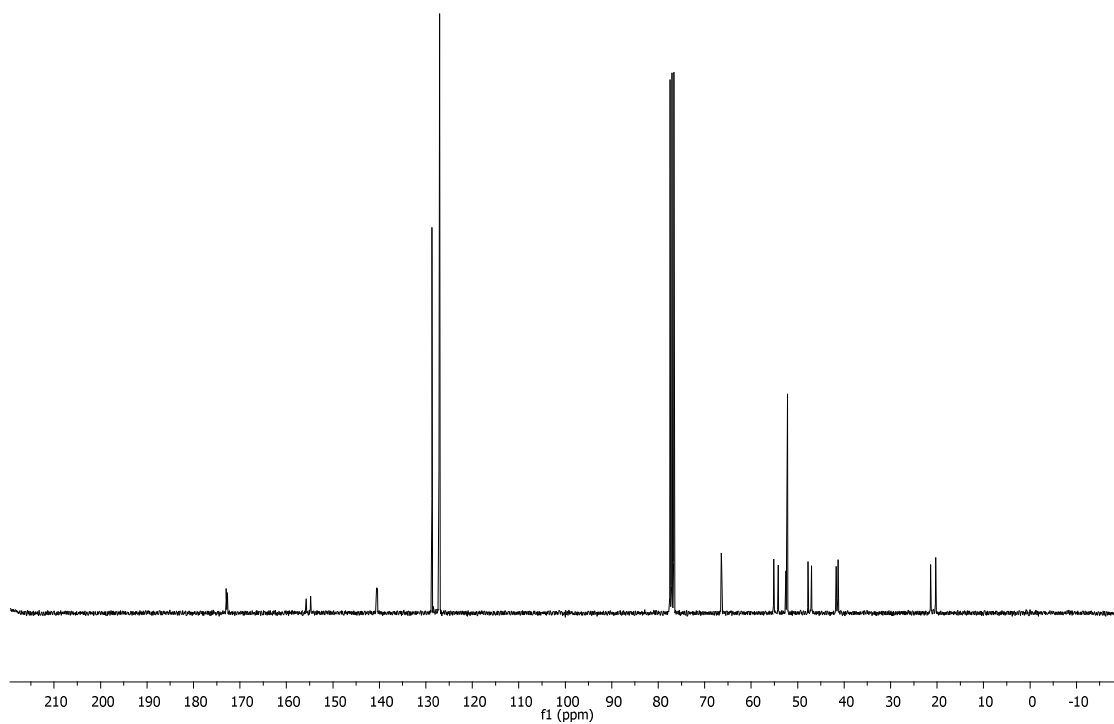

Figure 34: <sup>1</sup>H-NMR and <sup>13</sup>C-NMR spectra for compound 5r.

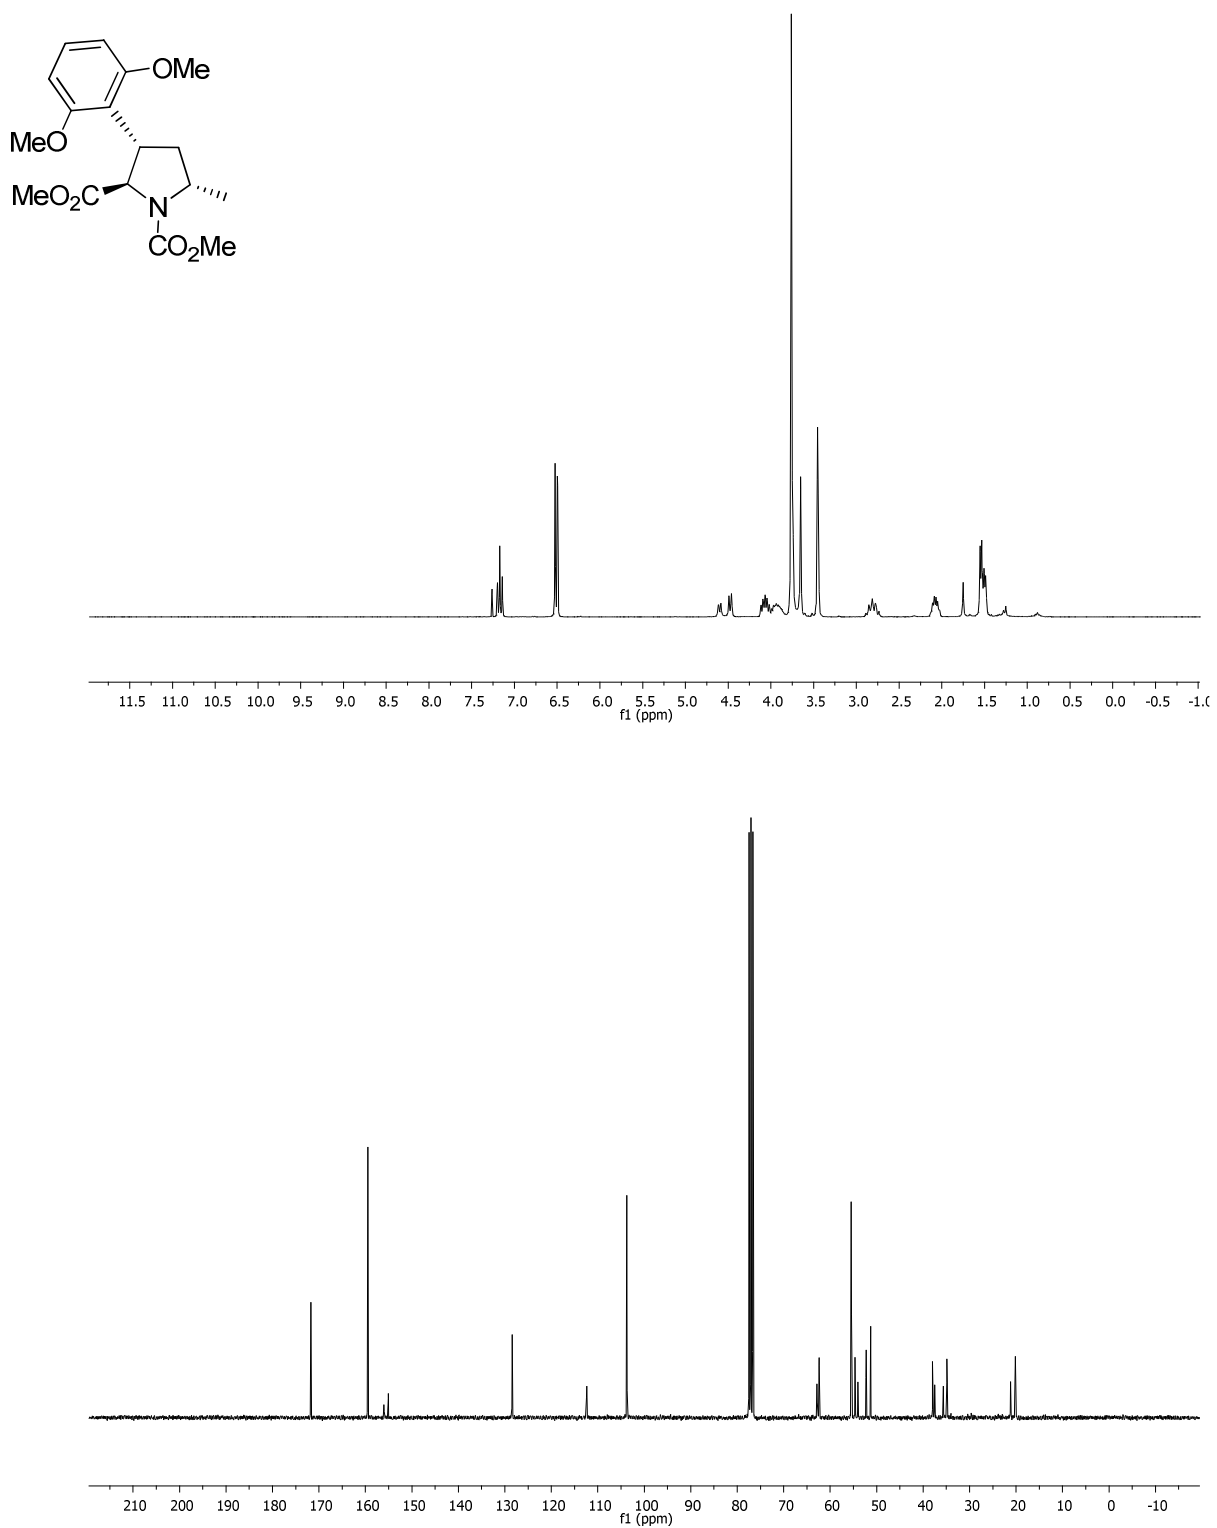

Figure 35:  $^1\text{H-NMR}$  and  $^{13}\text{C-NMR}$  spectra for compound **5s**.

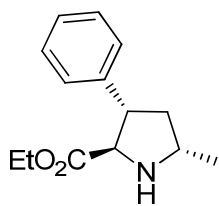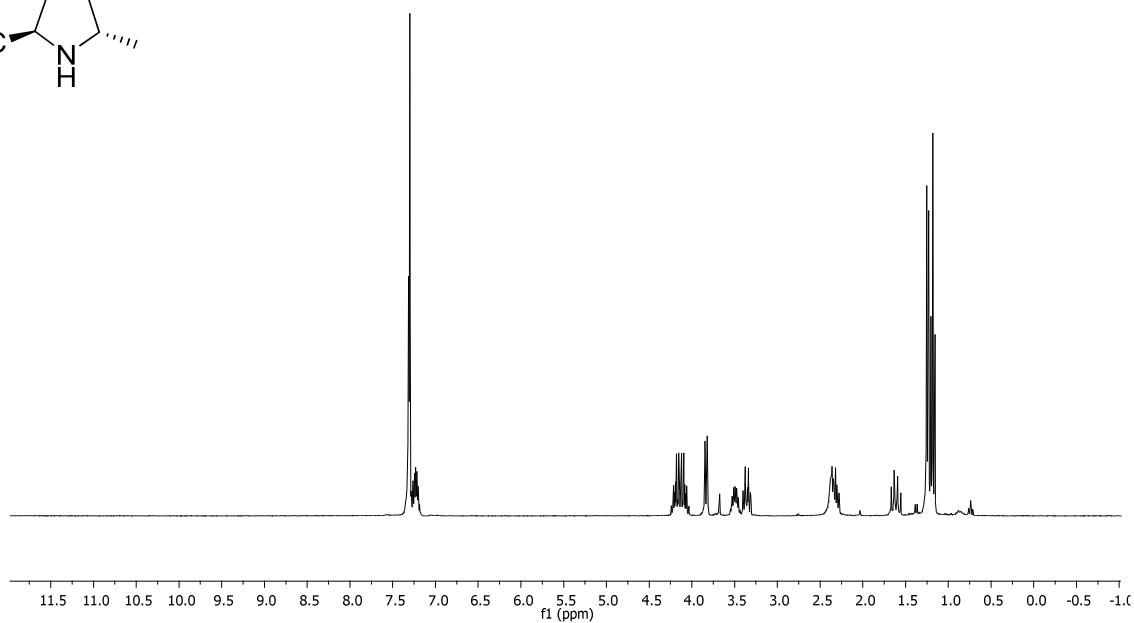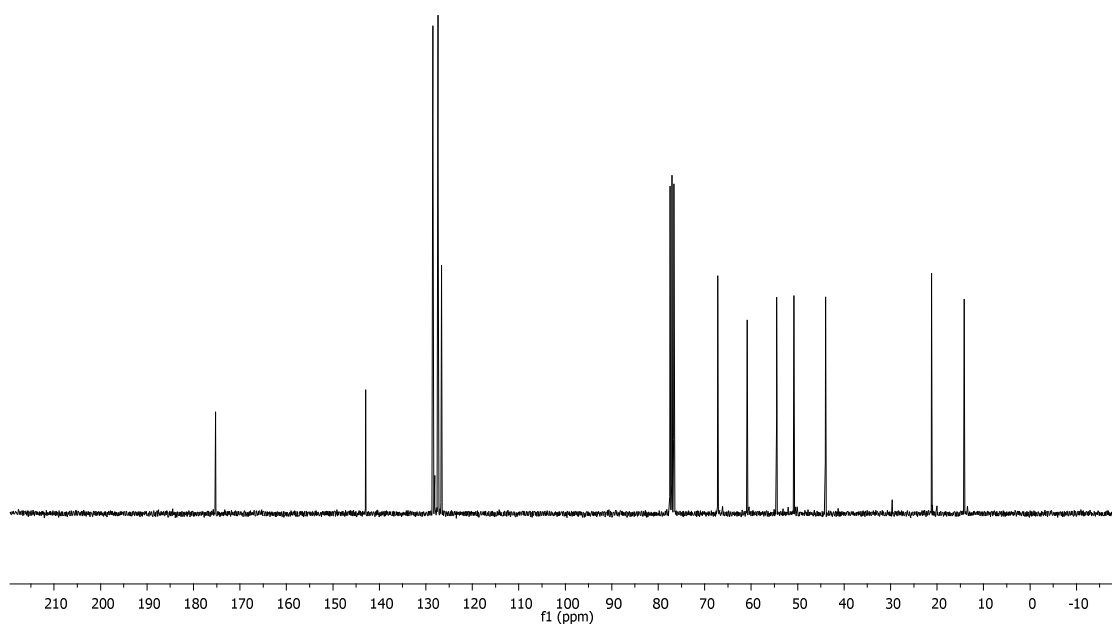

Figure 36:  $^1\text{H-NMR}$  and  $^{13}\text{C-NMR}$  spectra for compound 6a.

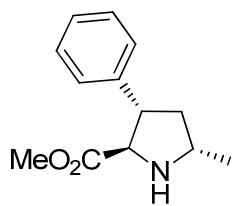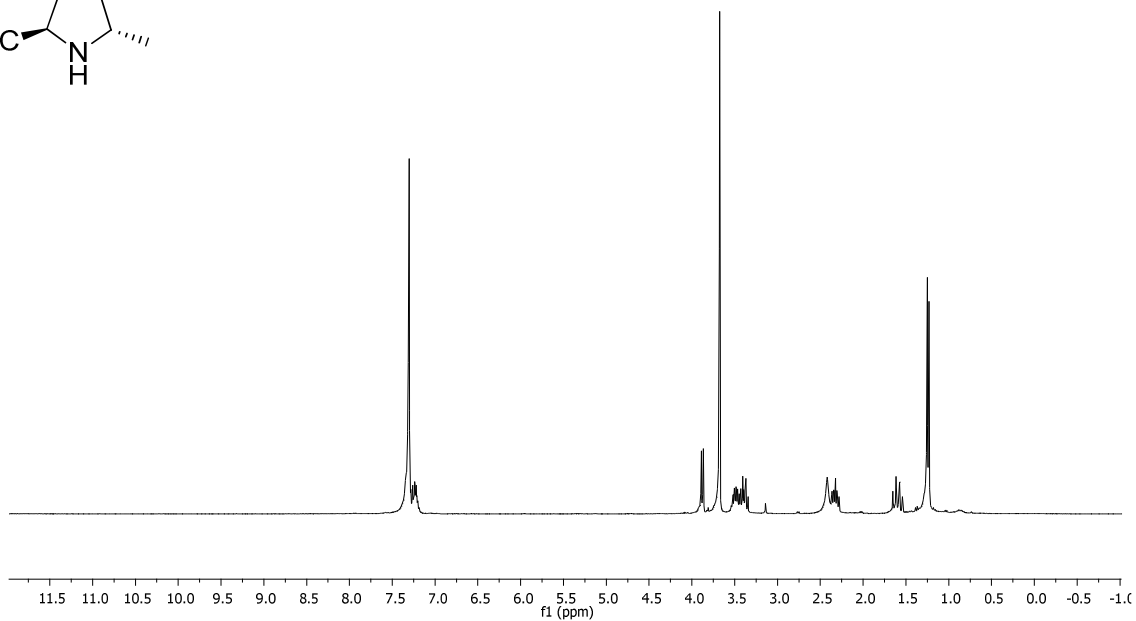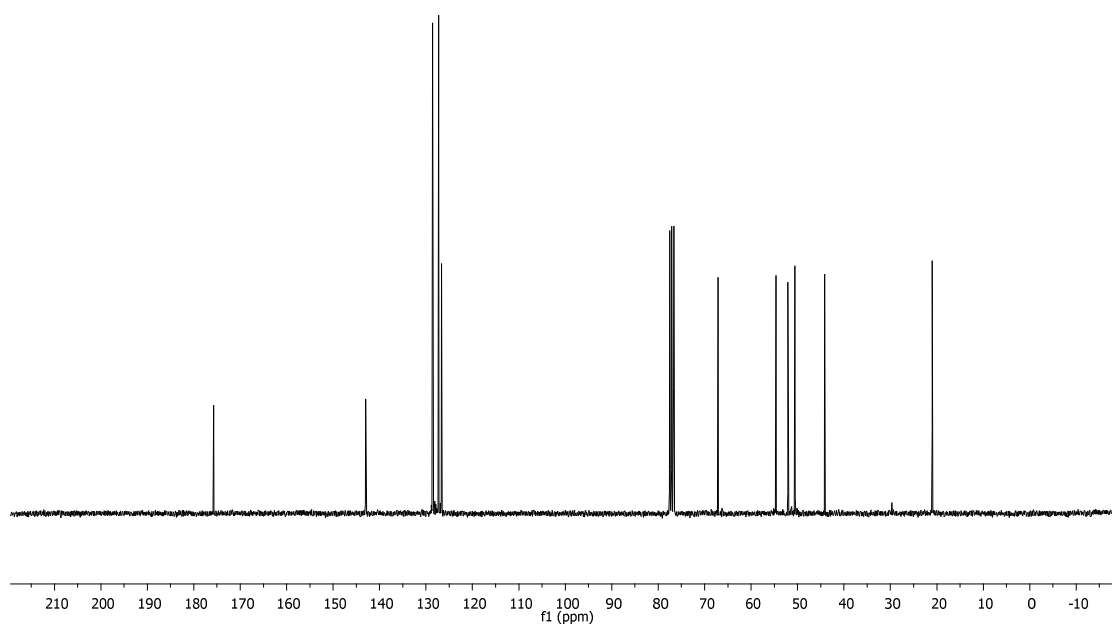

Figure 37: <sup>1</sup>H-NMR and <sup>13</sup>C-NMR spectra for compound 6r.

## HPLC Chromatograms

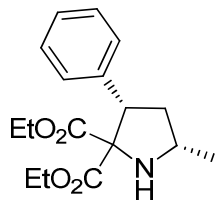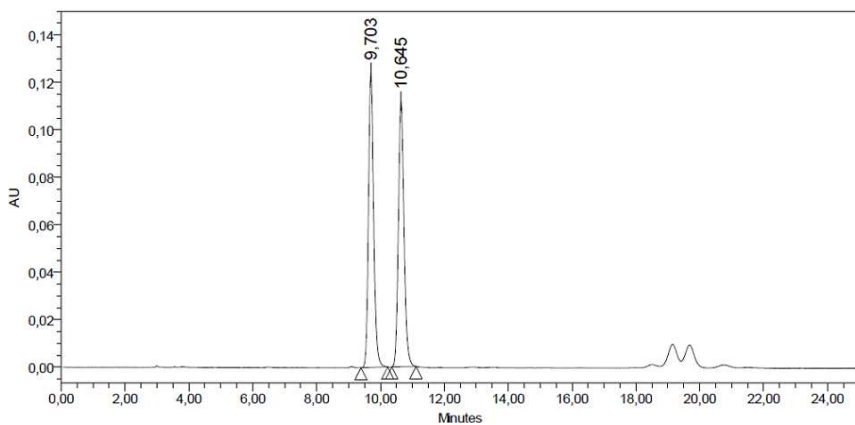

|   | RT     | % Area |
|---|--------|--------|
| 1 | 9,703  | 50,20  |
| 2 | 10,645 | 49,80  |

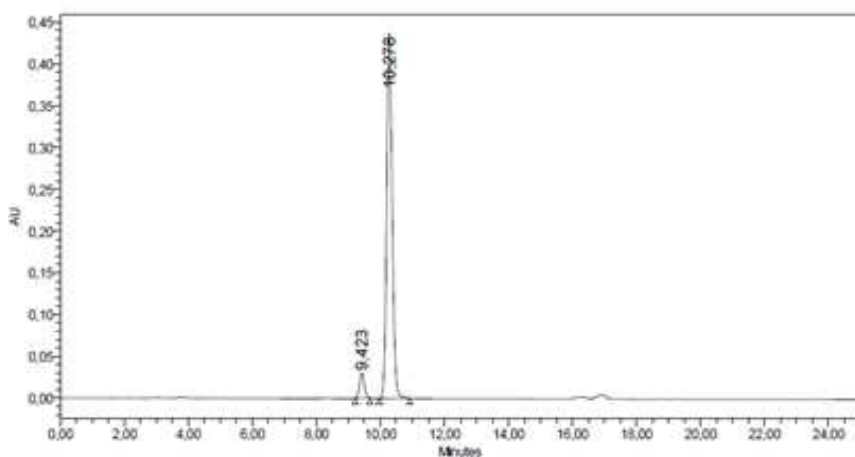

|   | RT     | % Area |
|---|--------|--------|
| 1 | 9,423  | 5,61   |
| 2 | 10,278 | 94,39  |

Figure 38: HPLC chromatogram for compounds *rac-4a* and *4a*.

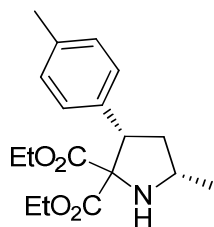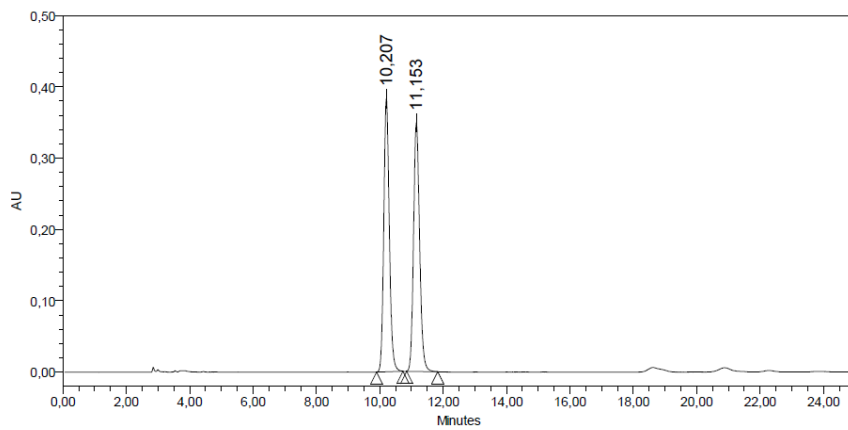

|   | RT     | % Area |
|---|--------|--------|
| 1 | 10,207 | 50,02  |
| 2 | 11,153 | 49,98  |

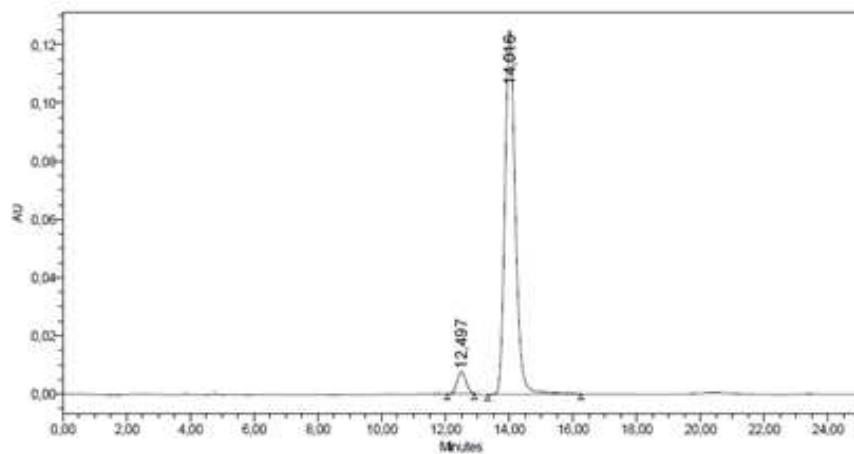

|   | RT     | % Area |
|---|--------|--------|
| 1 | 12,497 | 4,79   |
| 2 | 14,016 | 95,21  |

Figure 39: HPLC chromatogram for compounds **rac-4b** and **4b**.

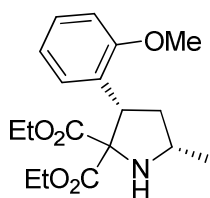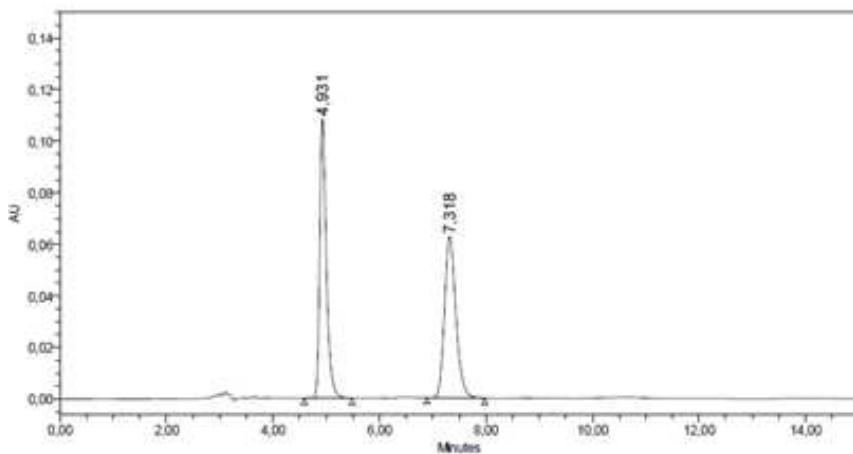

|   | RT    | % Area |
|---|-------|--------|
| 1 | 4,931 | 50,06  |
| 2 | 7,318 | 49,94  |

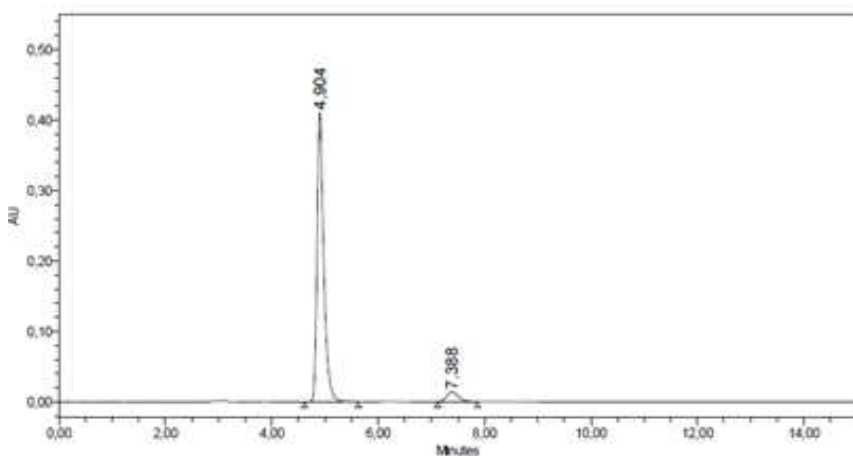

|   | RT    | % Area |
|---|-------|--------|
| 1 | 4,904 | 94,40  |
| 2 | 7,388 | 5,60   |

Figure 40: HPLC chromatogram for compounds *rac-4c* and *4c*.

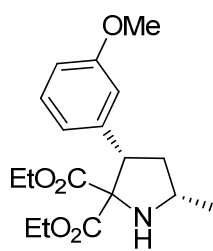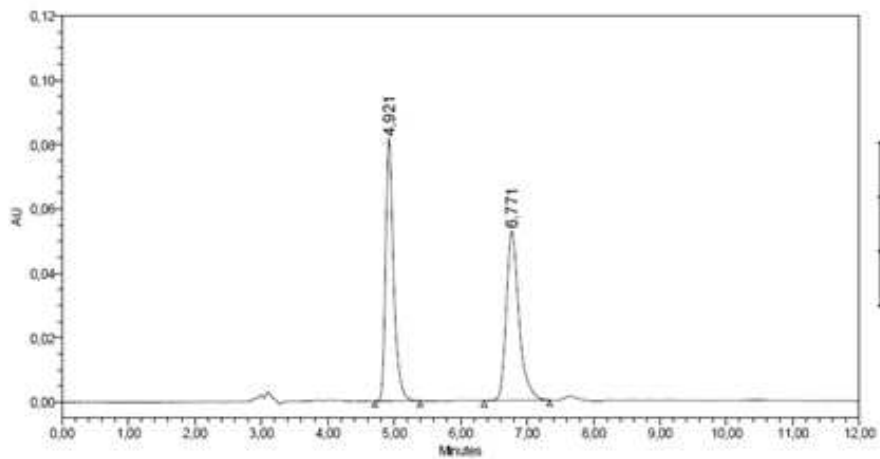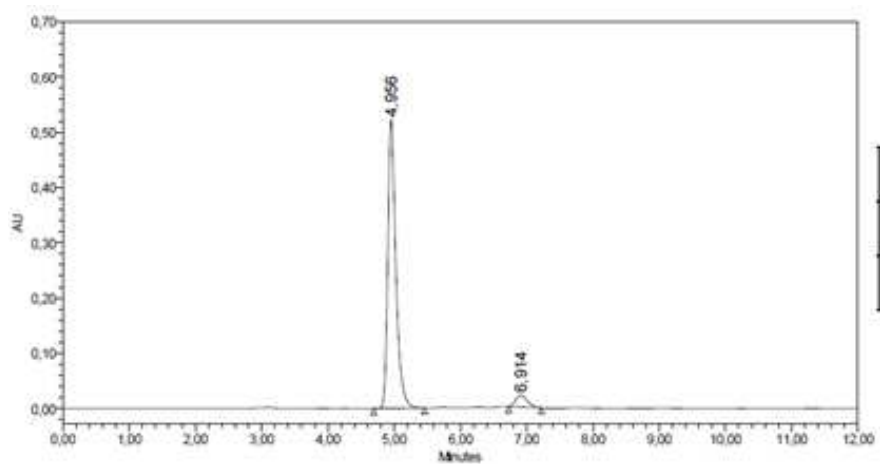

Figure 41: HPLC chromatogram for compounds **rac-4d** and **4d**.



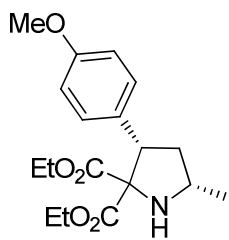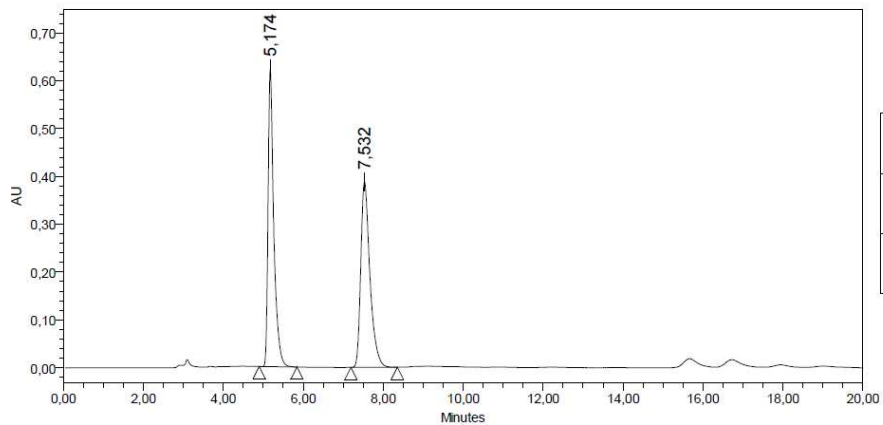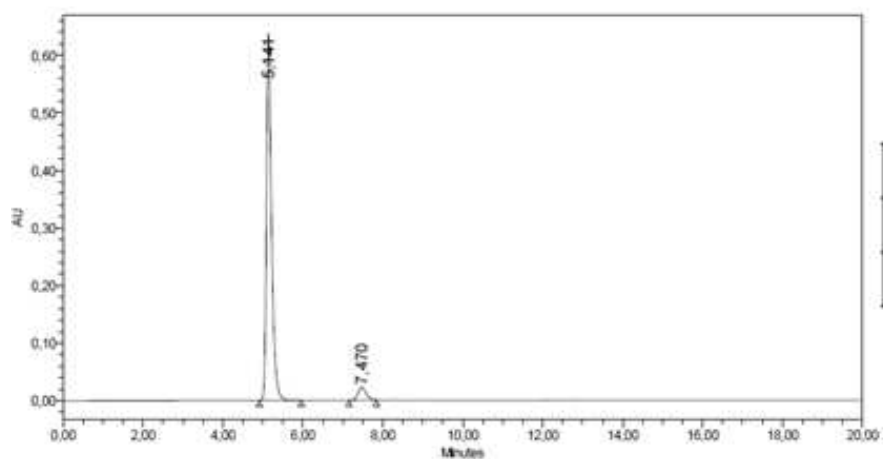

Figure 42: HPLC chromatogram for compounds **rac-4e** and **4e**.

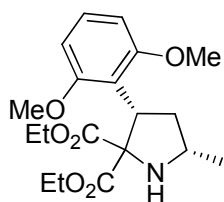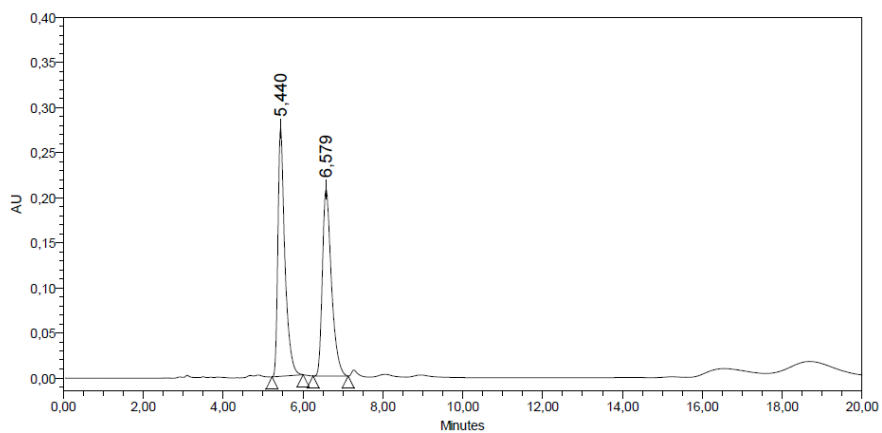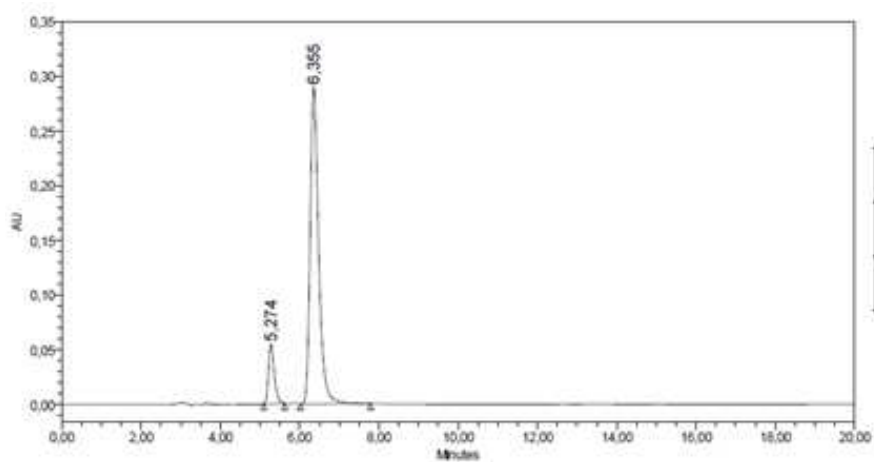

Figure 43: HPLC chromatogram for compounds *rac-4f* and *4f*.

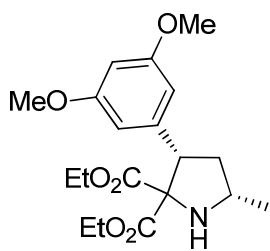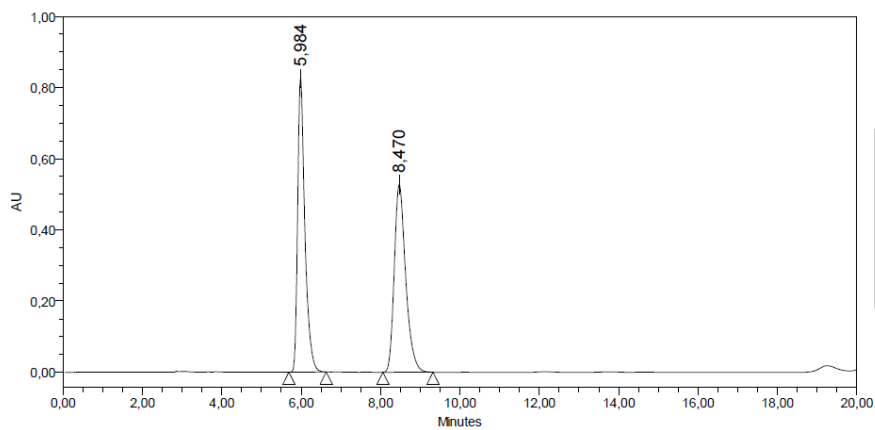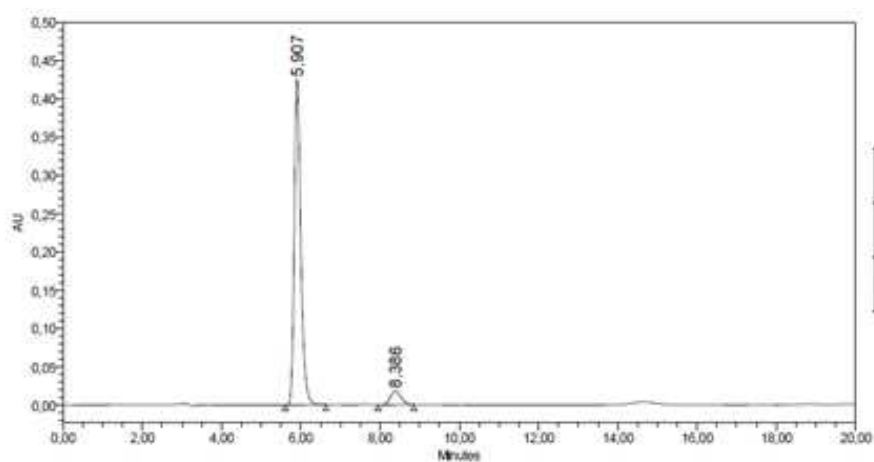

Figure 44: HPLC chromatogram for compounds **rac-4g** and **4g**.

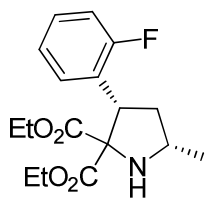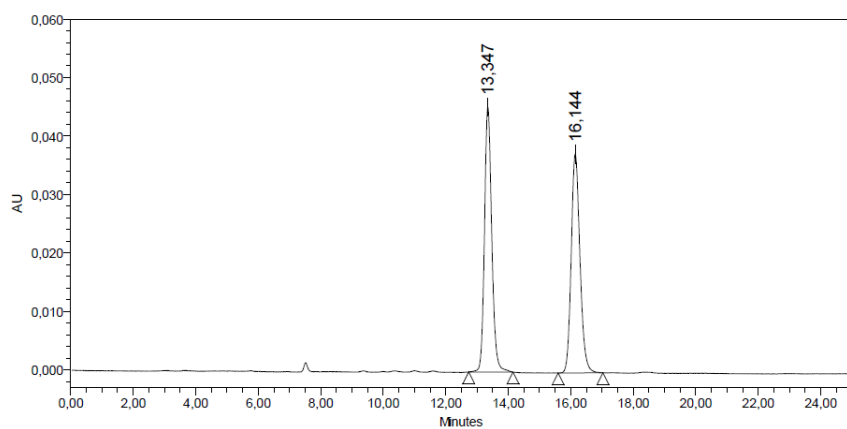

|   | RT     | % Area |
|---|--------|--------|
| 1 | 13,347 | 50,18  |
| 2 | 16,144 | 49,82  |

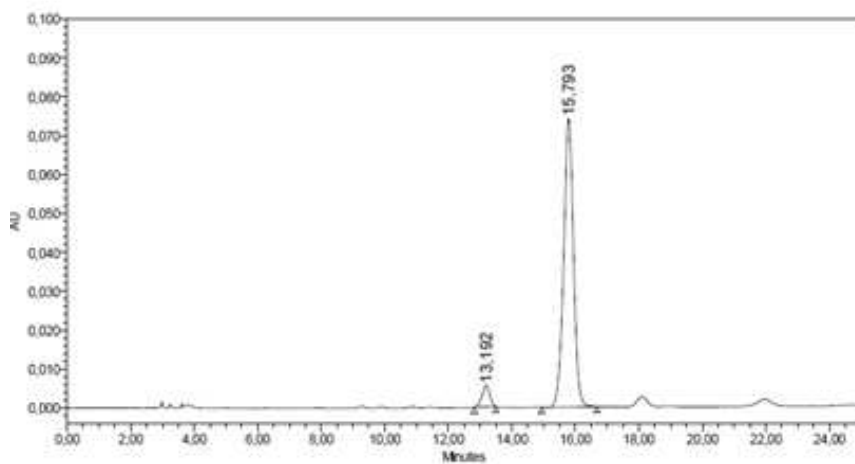

|   | RT     | % Area |
|---|--------|--------|
| 1 | 13,192 | 5,40   |
| 2 | 15,793 | 94,60  |

Figure 45: HPLC chromatogram for compounds **rac-4h** and **4h**.

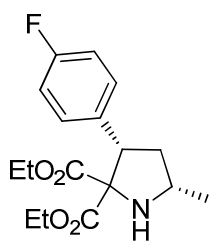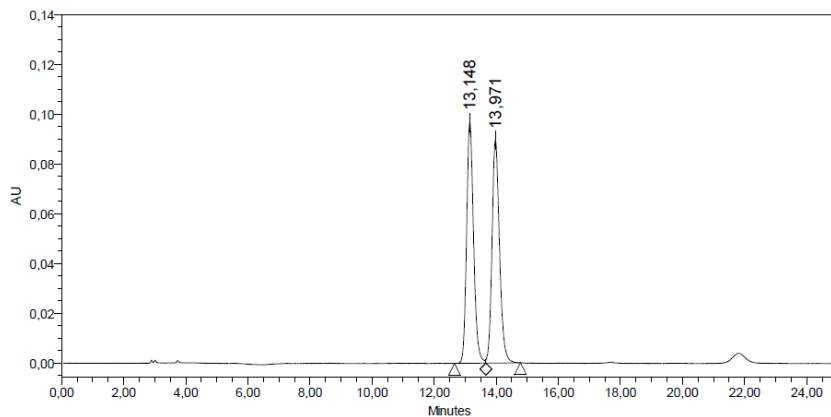

|   | RT     | % Area |
|---|--------|--------|
| 1 | 13,148 | 49,95  |
| 2 | 13,971 | 50,05  |

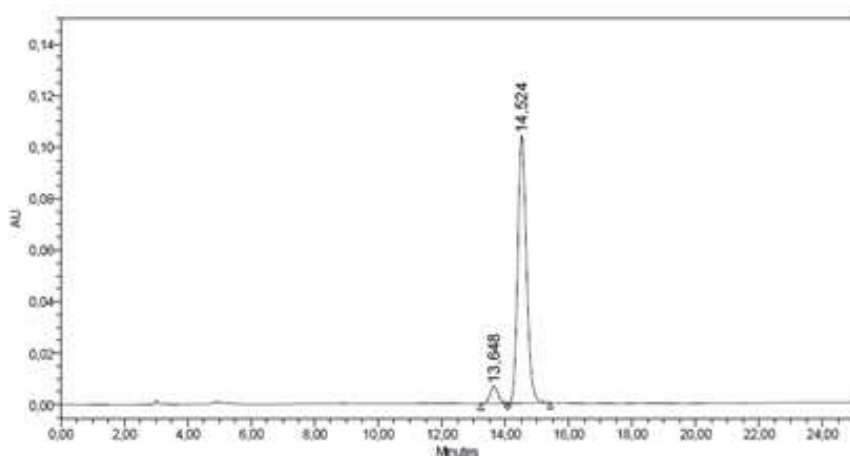

|   | RT     | % Area |
|---|--------|--------|
| 1 | 13,648 | 5,71   |
| 2 | 14,524 | 94,29  |

Figure 46: HPLC chromatogram for compounds *rac-4i* and *4i*.

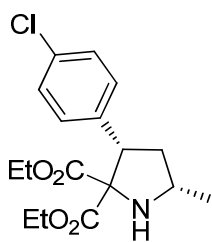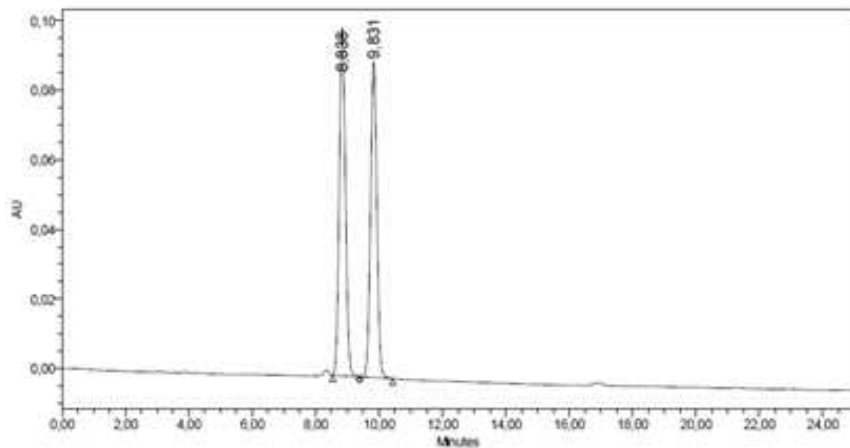

|   | RT    | % Area |
|---|-------|--------|
| 1 | 8,838 | 51,86  |
| 2 | 9,831 | 48,14  |

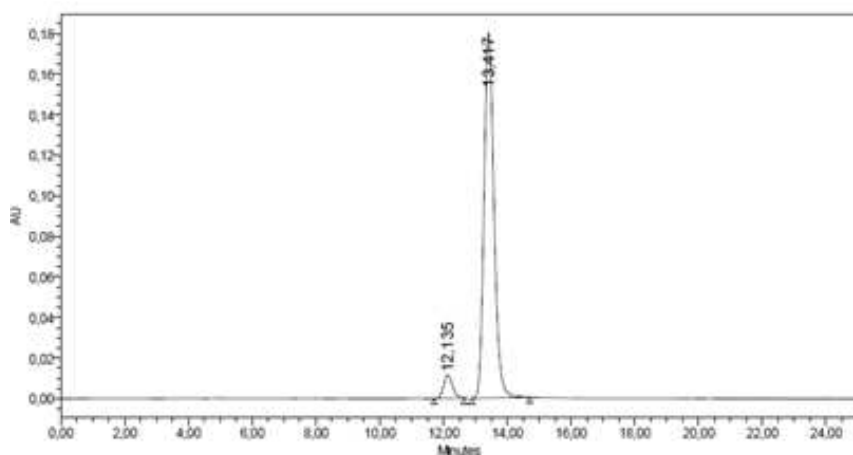

|   | RT     | % Area |
|---|--------|--------|
| 1 | 12,135 | 5,48   |
| 2 | 13,417 | 94,52  |

Figure 47: HPLC chromatogram for compounds *rac-4j* and **4j**.

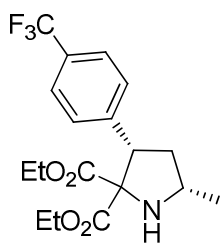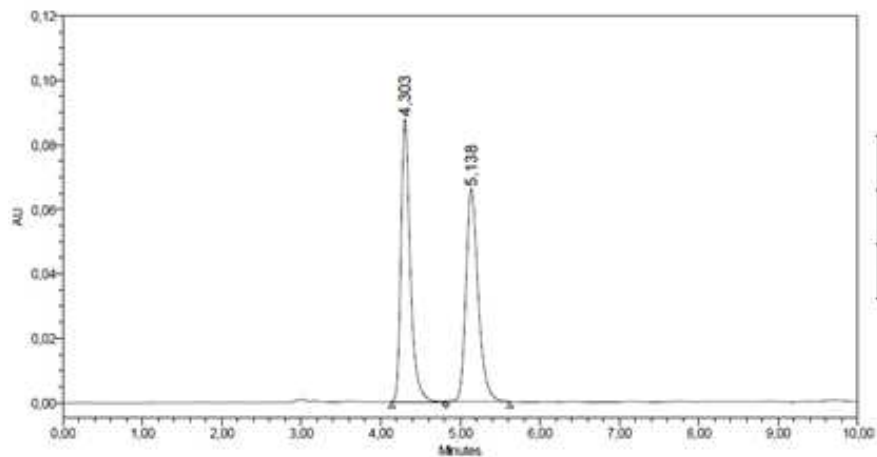

|   | RT    | % Area |
|---|-------|--------|
| 1 | 4,303 | 50,09  |
| 2 | 5,138 | 49,91  |

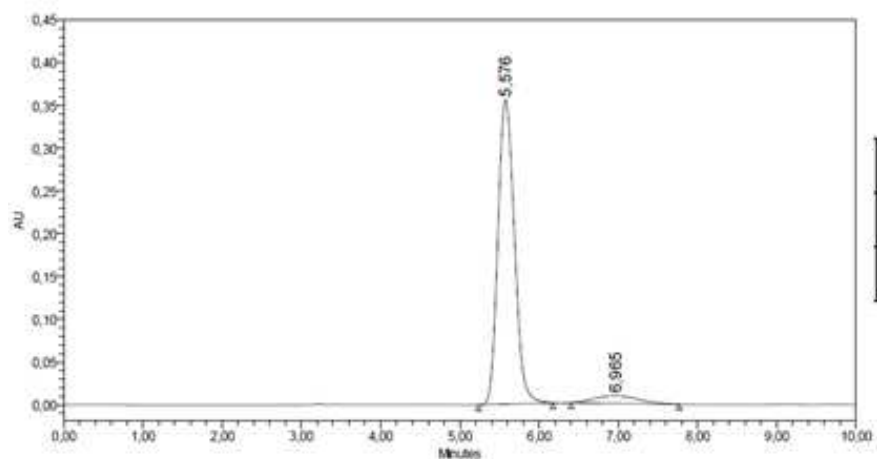

|   | RT    | % Area |
|---|-------|--------|
| 1 | 5,576 | 93,61  |
| 2 | 6,965 | 6,39   |

Figure 48: HPLC chromatogram for compounds **rac-4k** and **4k**.

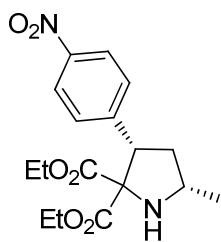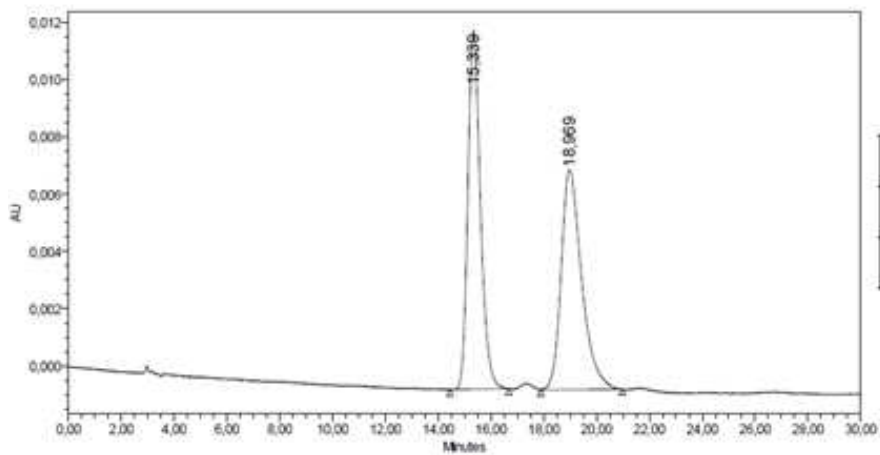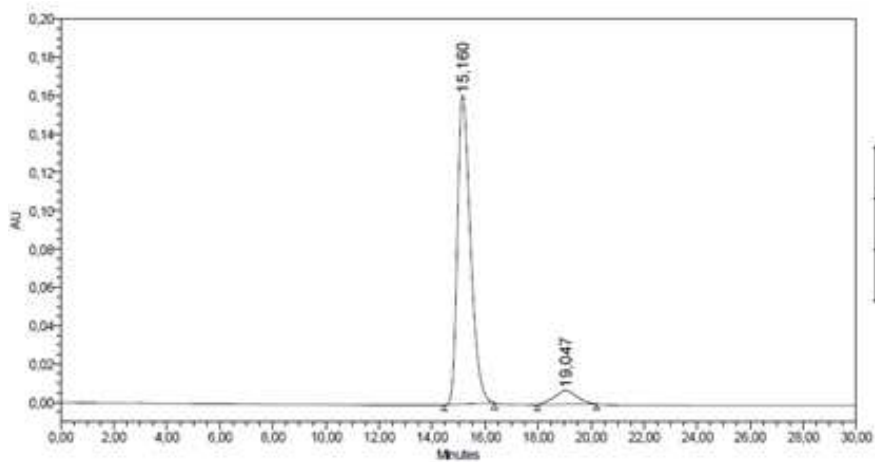

Figure 49: HPLC chromatogram for compounds **rac-4I** and **4I**.



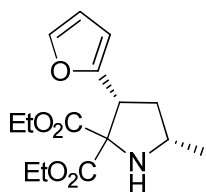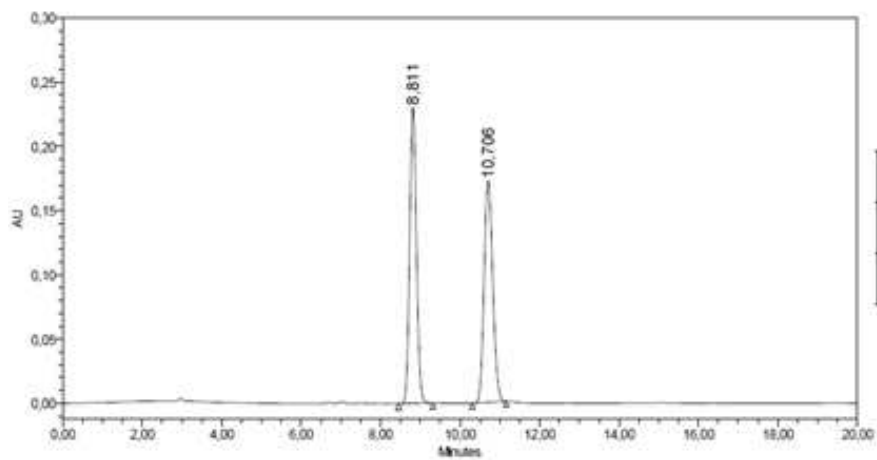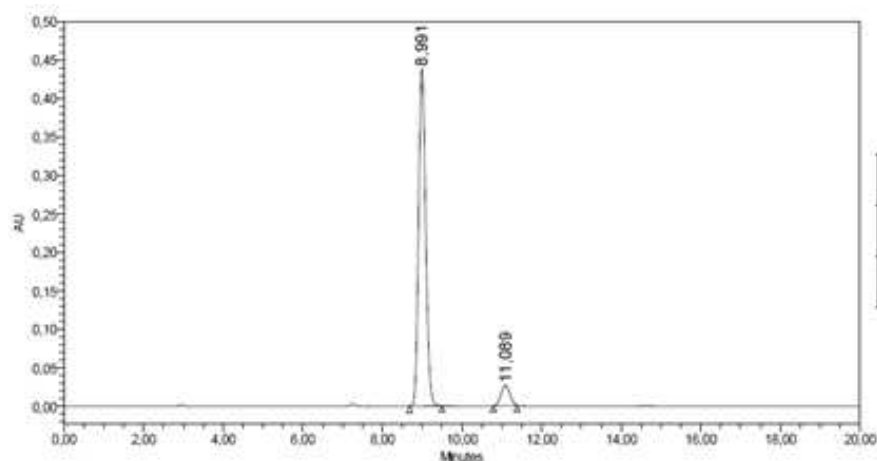

Figure 50: HPLC chromatogram for compounds *rac-4m* and *4m*.

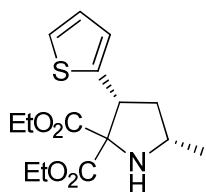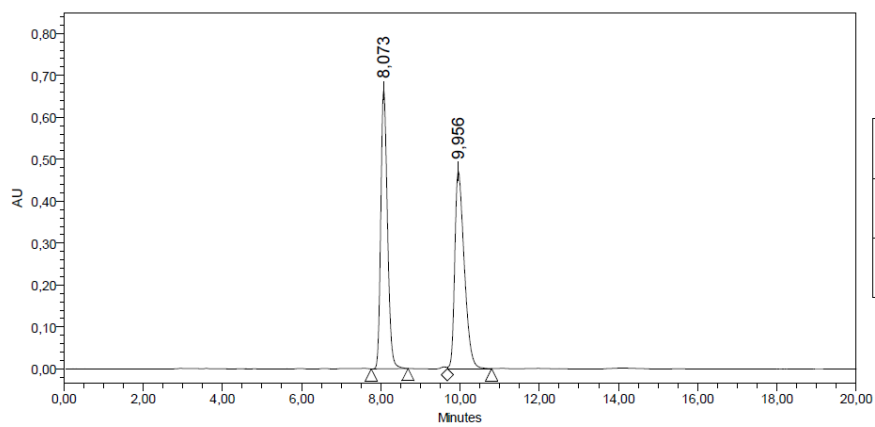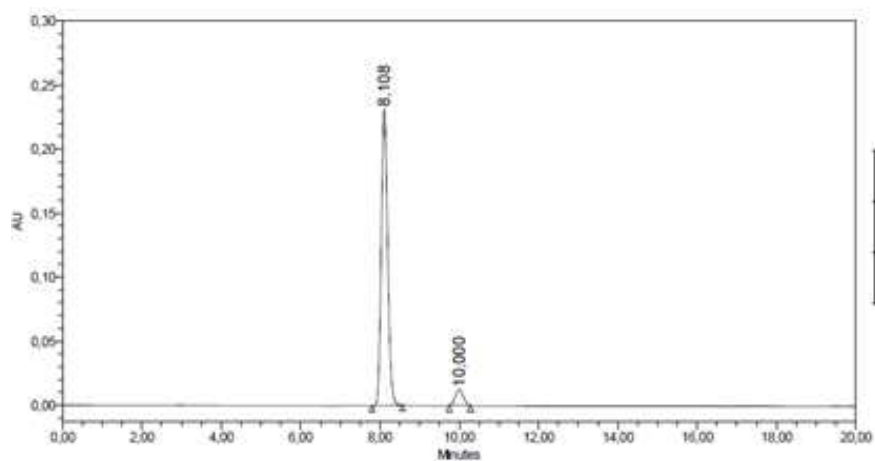

Figure 51: HPLC chromatogram for compounds *rac-4n* and *4n*.

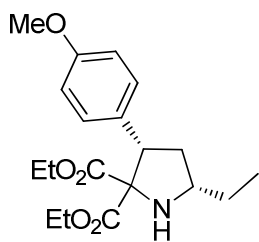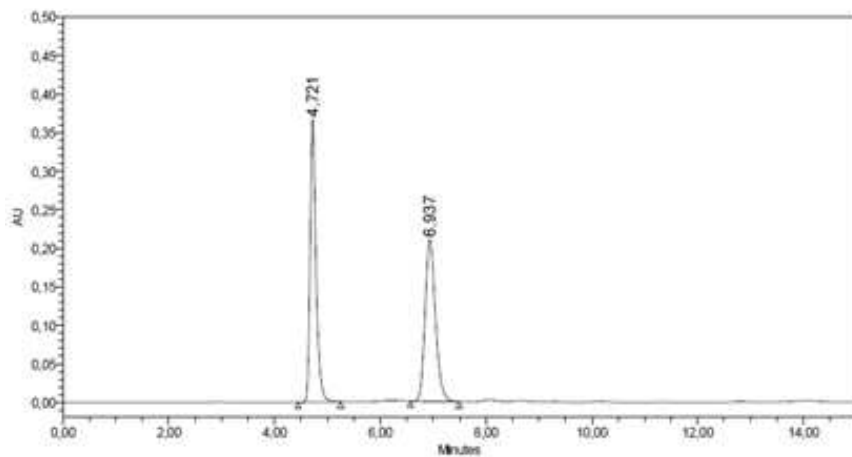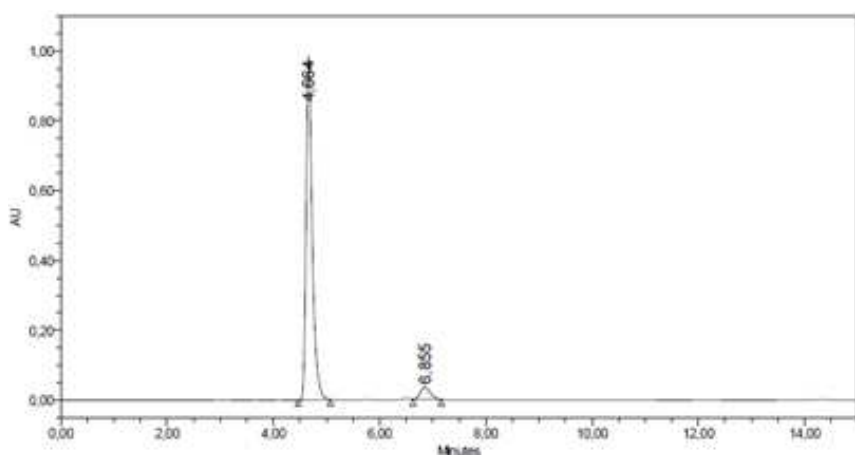

Figure 52: HPLC chromatogram for compounds *rac-4o* and **4o**.

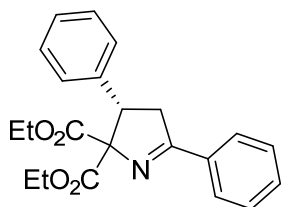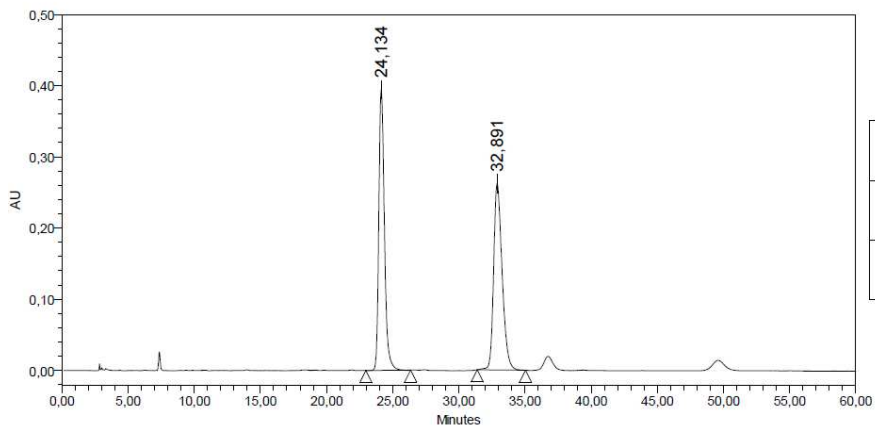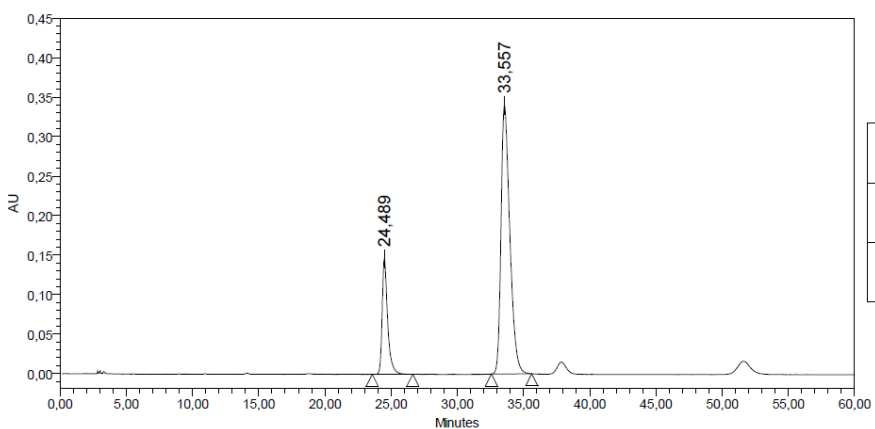

Figure 53: HPLC chromatogram for compounds **rac-4p** and **4p**.

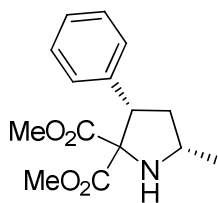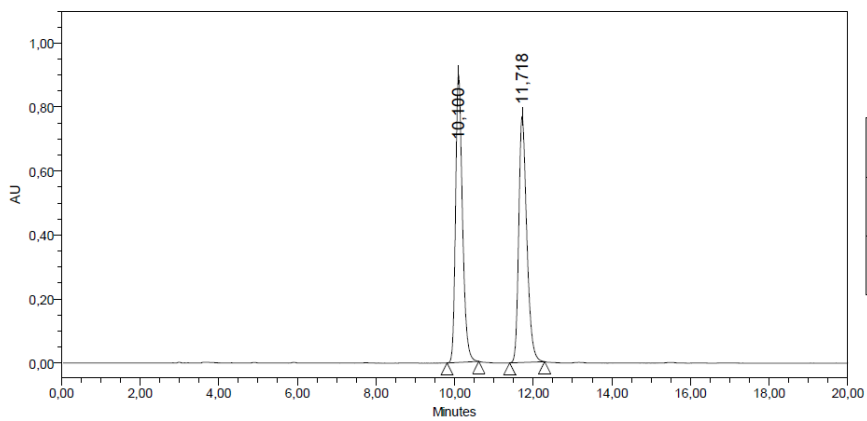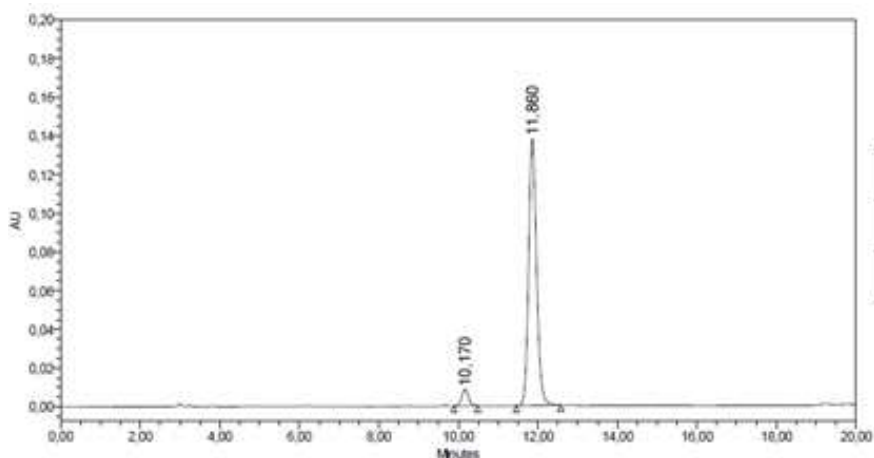

Figure 54: HPLC chromatogram for compounds *rac-4r* and *4r*.

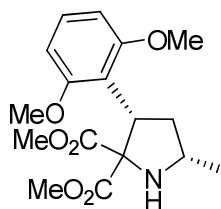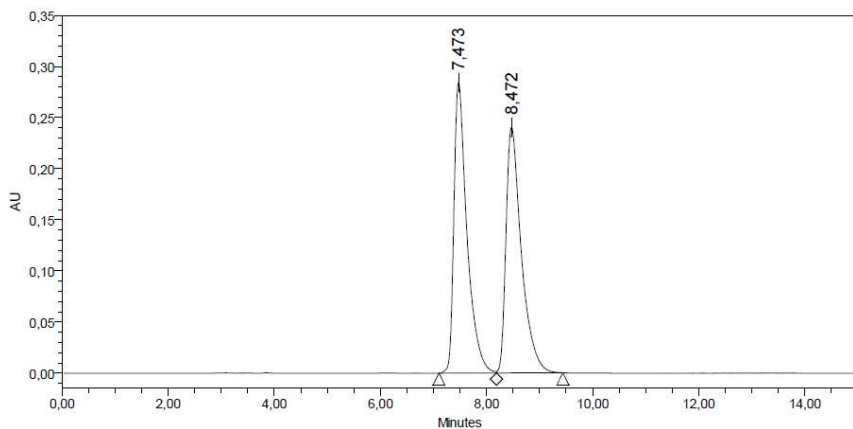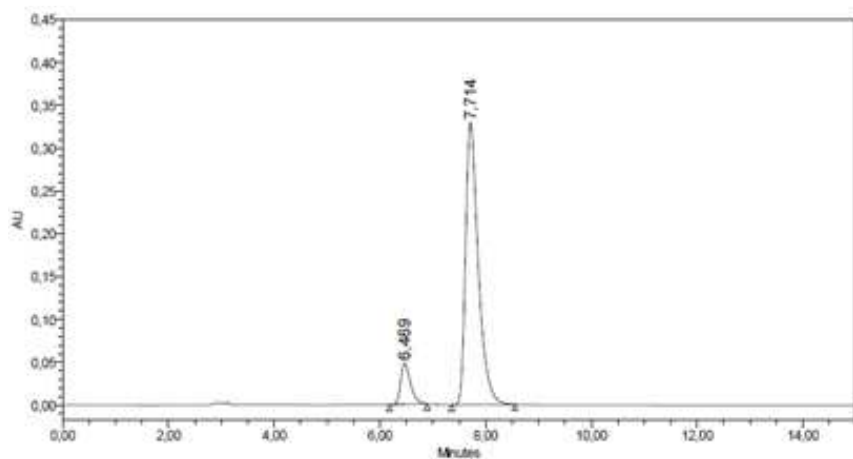

Figure 55: HPLC chromatogram for compounds *rac-4s* and *4s*.
